# Supplementary material for: Metal-free cascade oxidative decarbonylative alkylarylation of acrylamides with aliphatic aldehydes: a convenient approach to oxindoles via dual C(sp2)–H bond functionalization
Source: Royal Society of Chemistry journal article supplement (doi:10.1039/c6gc00362a), 2016-01-01

Electronic Supplementary Information

**Metal-free cascade oxidative decarbonylative alkylarylation of acrylamides with aliphatic aldehydes: a convenient approach to oxindoles via dual C(sp<sup>2</sup>)-H bonds functionalization**

Luo Yang\*,<sup>a</sup> Wen Lu,<sup>a</sup> Wang Zhou<sup>a</sup> and Feng Zhang\*,<sup>b</sup>

**Table of Contents**

|                                                                                    |               |
|------------------------------------------------------------------------------------|---------------|
| <b>I. General information .....</b>                                                | <b>S1</b>     |
| <b>II. General experimental procedures .....</b>                                   | <b>S1</b>     |
| <b>III. Condition optimization .....</b>                                           | <b>S2-4</b>   |
| <b>Table S1. Optimization of the oxidants .....</b>                                | <b>S2</b>     |
| <b>Table S2. Optimization of the temperature .....</b>                             | <b>S2</b>     |
| <b>Table S3. Optimization of the reactants ratio .....</b>                         | <b>S3</b>     |
| <b>Table S4. Optimization of the solvents .....</b>                                | <b>S3</b>     |
| <b>Table S4. Optimization of the additives .....</b>                               | <b>S4</b>     |
| <b>IV. Spectra data of products 3a-3r, 4b-4i .....</b>                             | <b>S5-13</b>  |
| <b>V. Copies of <sup>1</sup>H and <sup>13</sup>C NMR spectra of products .....</b> | <b>S14-67</b> |

## I. General information

Unless otherwise noted, all commercially available compounds were used as provided without further purification. Dry solvents (toluene, benzene, chlorobenzene *o*-dichlorobenzene, 1,2-dichloroethane) were used as commercially available;

Thin-layer chromatography (TLC) was performed using E. Merck silica gel 60 F254 precoated plates (0.25 mm) or Sorbent Silica Gel 60 F254 plates. The developed chromatography was analyzed by UV lamp (254 nm). High-resolution mass spectra (HRMS) were obtained from a JEOL JMS-700 instrument (ESI). Melting points are uncorrected. Nuclear magnetic resonance (NMR) spectra were recorded on a Bruker Avance 400 spectrometer at ambient temperature. Chemical shifts for <sup>1</sup>H NMR spectra are reported in parts per million (ppm) from tetramethylsilane with the solvent resonance as the internal standard (chloroform:  $\delta$  7.26 ppm). Chemical shifts for <sup>13</sup>C NMR spectra are reported in parts per million (ppm) from tetramethylsilane with the solvent as the internal standard (CDCl<sub>3</sub>:  $\delta$  77.16 ppm). Data are reported as following: chemical shift, multiplicity (s = singlet, d = doublet, dd = doublet of doublets, t = triplet, q = quartet, m = multiplet, br = broad signal), coupling constant (Hz), and integration.

## II. General experimental procedures

A general experimental procedure is described as following:

To a solution of N-methyl-N-phenylmethacrylamide (**1a**, 0.2 mmol, 1 equiv.) and pivalaldehyde (**2a**, 0.6 mmol, 3 equiv.) in chlorobenzene (1.5 mL) at ambient temperature, DTBP (0.4mmol, 2.0 equiv.) was added with vigorous stirring. The reaction mixture was stirred at 140°C (oil bath temperature) for 12 h. Afterwards The resulting mixture was cooled to room temperature, transferred to silica gel column directly and purified by column chromatography on silica gel with a mixture of EtOAc in petroleum ether as eluent to afford the pure product **3a**.

### III. Condition optimization

Table S1. Optimization of the oxidants<sup>[a]</sup>

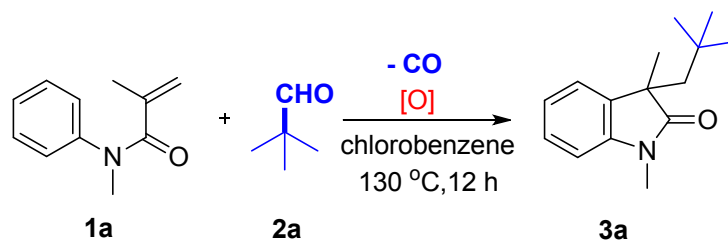

| Entry | Oxidant (equiv)               | Yield (%) <sup>[b]</sup> |
|-------|-------------------------------|--------------------------|
| 1     | DTBP                          | 65                       |
| 2     | BPO                           | 26                       |
| 3     | DCP                           | 45                       |
| 4     | H <sub>2</sub> O <sub>2</sub> | 34                       |
| 5     | PhI(OAc) <sub>2</sub>         | 41                       |
| 6     | TBHP                          | 56                       |

<sup>[a]</sup>To a solution of **1a** (0.2 mmol, 1 equiv.) and **2a** (0.6 mmol, 3 equiv.) in chlorobenzene (1.5 mL) at ambient temperature, oxidant (0.4 mmol, 2.0 equiv.) was added with vigorous stirring. The reaction mixture was stirring at 130°C for 12 h under air. <sup>[b]</sup> Isolated yields.

Table S2. Optimization of the temperature<sup>[a]</sup>

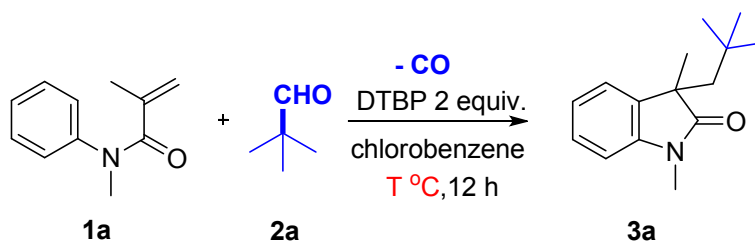

| Entry | Temperature (°C) | Yield (%) <sup>[b]</sup> |
|-------|------------------|--------------------------|
| 1     | 140              | 76                       |
| 2     | 130              | 65                       |
| 3     | 150              | 57                       |

<sup>[a]</sup>To a solution of **1a** (0.2 mmol, 1 equiv.) and **2a** (0.6 mmol, 3 equiv.) in chlorobenzene (1.5 mL) at ambient temperature, DTBP (0.4 mmol, 2.0 equiv.) was added with vigorous stirring. The reaction mixture was stirring at given temperature for 12 h under air. <sup>[b]</sup> Isolated yields.

**Table S3. Optimization of the reactants ratio<sup>[a]</sup>**

| Entry    | 2a (X equiv) | DTBP (Y equiv) | Yield (%) <sup>[b]</sup> |
|----------|--------------|----------------|--------------------------|
| 1        | 3            | 1.5            | 59                       |
| 2        | 3            | 2.0            | 65                       |
| 3        | 3            | 2.5            | 65                       |
| 4        | 1.5          | 2.0            | 66                       |
| <b>5</b> | <b>3.0</b>   | <b>2.0</b>     | <b>76</b>                |
| 6        | 5.0          | 2.0            | 71                       |

<sup>[a]</sup>To a solution of **1a** (0.2 mmol, 1 equiv.) and **2a** (X equiv.) in chlorobenzene (1.5 mL) at ambient temperature, DTBP (Y equiv.) was added with vigorous stirring. The reaction mixture was stirring at 140°C for 12 h under air. <sup>[b]</sup> Isolated yields.

**Table S4. Optimization of the solvents<sup>[a]</sup>**

| Entry    | Solvent (mL)                    | Yield (%) <sup>[b]</sup> |
|----------|---------------------------------|--------------------------|
| 1        | Benzene (1.5)                   | 53                       |
| 2        | <i>o</i> -Dichlorobenzene (1.5) | 74                       |
| 3        | Toluene (1.5)                   | 33                       |
| 4        | Fluorobenzene (1.5)             | 51                       |
| <b>5</b> | <b>chlorobenzene (1.5)</b>      | <b>76</b>                |
| 6        | Fluorobenzene (1.5)             | 36                       |
| 9        | 1,2-Dichloroethane (1.5)        | 43                       |

<sup>[a]</sup>To a solution of **1a** (0.2 mmol, 1 equiv.) and **2a** (0.6 mmol, 3 equiv.) in solvent (1.5 mL) at ambient temperature, DTBP (0.4 mmol, 2.0 equiv.) was added with vigorous stirring. The reaction mixture was stirring at 140°C for 12 h under air. <sup>[b]</sup> Isolated yields.

**Table S5. Optimization of the additives<sup>[a]</sup>**

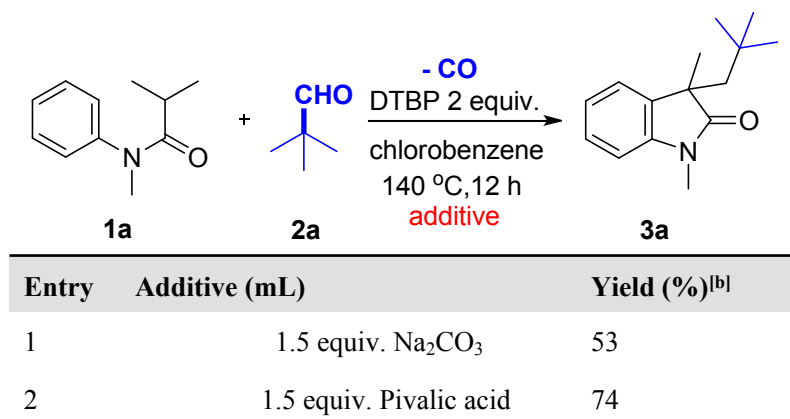

<sup>[a]</sup>To a solution of **1a** (0.2 mmol, 1 equiv.), **2a** (0.6 mmol, 3 equiv.) and additive in chlorobenzene (1.5 mL) at ambient temperature, DTBP (0.4 mmol, 2.0 equiv.) was added with vigorous stirring. The reaction mixture was stirring at 140°C for 12 h under air. <sup>[b]</sup> Isolated yields.

## V. Spectra data of products 3a-3h, 4b-4x, 5, 6, 6'

### (3a) 1,3-dimethyl-3-neopentylindolin-2-one <sup>1</sup>

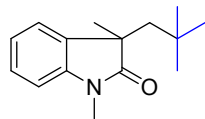

The title compound was prepared according to the general procedure described above by the reaction between N-methyl-N-phenylmethacrylamide (**1a**) with pivalaldehyde (**2a**), and purified by flash column chromatography as light yellow solid (35.1 mg, 76%).

M.p. 104-105°C; <sup>1</sup>H NMR (400 MHz, CDCl<sub>3</sub>) δ 7.26 (t, *J* = 7.2 Hz, 1H), 7.20 (d, *J* = 6.8 Hz, 1H), 7.03 (t, *J* = 7.2 Hz, 1H), 6.85 (d, *J* = 7.6 Hz, 1H), 3.22 (s, 4H), 2.16 (d, *J* = 14.4 Hz, 1H), 1.86 (d, *J* = 14.4 Hz, 1H), 1.29 (s, 3H), 0.61 (s, 9H). <sup>13</sup>C NMR (100 MHz, CDCl<sub>3</sub>) δ 181.12, 142.96, 134.30, 127.64, 123.96, 122.08, 108.12, 50.89, 47.49, 31.87, 30.92, 28.38, 26.33.

### (3b) N-methyl-N-(p-tolyl)methacrylamide <sup>2</sup>

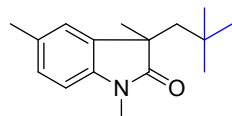

The title compound was prepared according to the general procedure described above by the reaction between N-methyl-N-(p-tolyl)methacrylamide (**1b**) with pivalaldehyde (**2a**), and purified by flash column chromatography as white solid (42.14mg, 86%).

M.p. 120-121 °C; <sup>1</sup>H NMR (400 MHz, CDCl<sub>3</sub>) δ 7.05 (d, *J* = 8.0 Hz, 1H), 7.01 (s, 1H), 6.73 (d, *J* = 8.0 Hz, 1H), 3.20 (s, 3H), 2.34 (s, 3H), 2.14 (d, *J* = 14.4 Hz, 1H), 1.83 (d, *J* = 14.4 Hz, 1H), 1.28 (s, 3H), 0.61 (s, 9H). <sup>13</sup>C NMR (100 MHz, CDCl<sub>3</sub>) δ 181.08, 140.63, 134.37, 131.48, 127.83, 124.80, 107.80, 50.88, 47.53, 31.86, 30.92, 28.41, 26.34, 21.23.

### (3c) 5-methoxy-1,3-dimethyl-3-neopentylindolin-2-one <sup>2</sup>

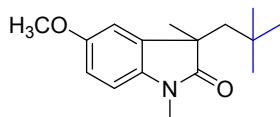

The title compound was prepared according to the general procedure described above by the reaction between N-(4-methoxyphenyl)-N-methylmethacrylamide (**1c**) with pivalaldehyde (**2a**), and purified by flash column chromatography as light yellow oil (39.67 mg, 76%).

<sup>1</sup>H NMR (400 MHz, CDCl<sub>3</sub>) δ 6.85 – 6.63 (m, 3H), 3.79 (s, 3H), 3.19 (s, 3H), 2.15 (d, *J* = 14.4 Hz, 1H), 1.82 (d, *J* = 14.4 Hz, 3H), 1.28 (s, 1H), 0.63 (s, 9H). <sup>13</sup>C NMR (100 MHz, CDCl<sub>3</sub>) δ 180.80, 155.83, 136.69, 135.82, 111.88, 111.68, 108.32, 55.98, 50.92, 47.95, 31.90, 30.96, 28.47, 26.42.

### (3d) N-([1,1'-biphenyl]-4-yl)-N-methylmethacrylamide

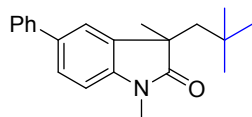

The title compound was prepared according to the general procedure described above by the

<sup>1</sup> J. Xie, P. Xu, H.-M Li, Q.-C Xue, H.-M Jin, Y.-X Cheng and C.- J Zhu, *Chem. Commun.* **2013**, 49, 5672.

<sup>2</sup> T. Wu, H. Zhang, G.-S Liu, *Tetrahedron Lett.* **2012**, 68, 5229.

reaction between N-([1,1'-biphenyl]-4-yl)-N-methylmethacrylamide (**1d**) with pivalaldehyde (**2a**), and purified by flash column chromatography as white solid (46.66 mg, 76%).

M.p. 125-126 °C; <sup>1</sup>H NMR (400 MHz, CDCl<sub>3</sub>) δ 7.55 (d, *J* = 7.2 Hz, 2H), 7.49 (dd, *J* = 8.0, 1.6 Hz, 1H), 7.44 (t, *J* = 8.0 Hz, 3H), 7.33 (t, *J* = 7.2 Hz, 1H), 6.92 (d, *J* = 8.0 Hz, 1H), 3.26 (s, 3H), 2.20 (d, *J* = 14.8 Hz, 1H), 1.92 (d, *J* = 14.4 Hz, 1H), 1.34 (s, 3H), 0.65 (s, 9H). <sup>13</sup>C NMR (100 MHz, CDCl<sub>3</sub>) δ 181.20, 142.38, 141.28, 135.52, 134.83, 128.90, 127.00, 126.93, 126.59, 122.95, 108.35, 50.92, 47.66, 31.93, 30.99, 28.44, 26.47. IR (cm<sup>-1</sup>): 2969, 2355, 1706, 1617, 1489, 1473, 1349, 758, 688; HRMS: calcd. for [M+H]<sup>+</sup> C<sub>21</sub>H<sub>26</sub>NO: 308.20146, found: 308.20089.

### (3e) 5-fluoro-1,3-dimethyl-3-neopentylindolin-2-one <sup>2</sup>

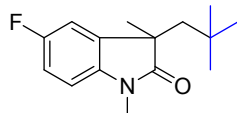

The title compound was prepared according to the general procedure described above by the reaction between N-(4-fluorophenyl)-N-methylmethacrylamide (**1e**) with pivalaldehyde (**2a**), and purified by flash column chromatography as white solid (38.34 mg, 77%).

M.p. 121-123 °C; <sup>1</sup>H NMR (400 MHz, CDCl<sub>3</sub>) δ 6.98-6.93 (m, 2H), 6.76 (dd, *J* = 8.0, 4.0 Hz, 1H), 3.21 (s, 3H), 2.16 (d, *J* = 14.4 Hz, 1H), 1.82 (d, *J* = 14.4 Hz, 1H), 1.29 (s, 3H), 0.63 (s, 9H). <sup>13</sup>C NMR (100 MHz, CDCl<sub>3</sub>) δ 180.69, 160.41, 158.03, 138.93, 136.22, 136.14, 113.95, 113.72, 112.10, 111.85, 108.54, 108.46, 50.91, 47.99, 47.97, 31.87, 30.92, 28.30, 26.45.

### (3f) 5-chloro-1,3-dimethyl-3-neopentylindolin-2-one <sup>2</sup>

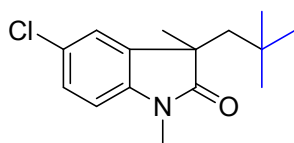

The title compound was prepared according to the general procedure described above by the reaction between N-(4-chlorophenyl)-N-methylmethacrylamide (**1f**) with pivalaldehyde (**2a**), and purified by flash column chromatography as white solid (33.86 mg, 81%).

M.p. 132-134 °C; <sup>1</sup>H NMR (400 MHz, CDCl<sub>3</sub>) δ 7.25 – 7.21 (m, 1H), 7.17 (s, 1H), 6.77 (d, *J* = 8.0 Hz, 1H), 3.21 (s, 3H), 2.16 (d, *J* = 14.4 Hz, 1H), 1.83 (d, *J* = 14.4 Hz, 1H), 1.29 (s, 3H), 0.63 (s, 9H). <sup>13</sup>C NMR (100 MHz, CDCl<sub>3</sub>) δ 180.56, 141.55, 136.25, 127.60, 124.41, 109.05, 50.93, 47.90, 31.93, 30.97, 28.36, 26.49.

### (3g) 5-bromo-1,3-dimethyl-3-neopentylindolin-2-one <sup>2</sup>

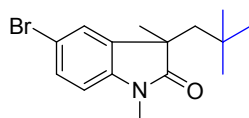

M.p. 147-149 °C; The title compound was prepared according to the general procedure described above by the reaction between N-(4-bromophenyl)-N-methylmethacrylamide (**1g**) with pivalaldehyde (**2a**), and purified by flash column chromatography as white solid (36.46 mg, 59%).

<sup>1</sup>H NMR (400 MHz, DMSO) δ 7.39 (d, *J* = 8.0 Hz, 1H), 7.31 (s, 1H), 6.73 (d, *J* = 8.0 Hz, 1H), 3.20 (s, 3H), 2.15 (d, *J* = 14.4 Hz, 1H), 1.83 (d, *J* = 14.4 Hz, 1H), 1.29 (s, 3H), 0.62 (s, 9H). <sup>13</sup>C NMR (100

MHz, CDCl<sub>3</sub>)  $\delta$  180.47, 142.08, 136.64, 130.53, 127.19, 114.94, 109.60, 50.97, 47.80, 31.94, 31.00, 28.34, 26.47.

**(3h) 5-iodo-1,3-dimethyl-3-neopentylindolin-2-one** <sup>2</sup>

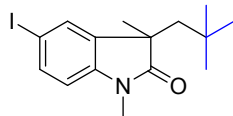

The title compound was prepared according to the general procedure described above by the reaction between N-(4-iodophenyl)-N-methylmethacrylamide (**1h**) with pivalaldehyde (**2a**), and purified by flash column chromatography as white solid (59.26 mg, 83%).

M.p. 110-111 °C; <sup>1</sup>H NMR (400 MHz, CDCl<sub>3</sub>)  $\delta$  7.58 (d, *J* = 8.0 Hz, 1H), 7.48 (s, 1H), 6.63 (d, *J* = 8.4 Hz, 1H), 3.19 (s, 3H), 2.13 (d, *J* = 14.4 Hz, 1H), 1.82 (d, *J* = 14.4 Hz, 1H), 1.28 (s, 3H), 0.62 (s, 9H). <sup>13</sup>C NMR (100 MHz, CDCl<sub>3</sub>)  $\delta$  180.31, 142.70, 136.94, 136.48, 132.76, 110.24, 84.71, 50.90, 47.60, 31.94, 30.99, 28.29, 26.42.

**(3i) N-methyl-N-(4-(trifluoromethyl)phenyl)methacrylamide** <sup>2</sup>

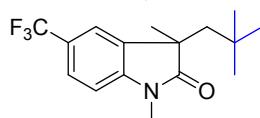

The title compound was prepared according to the general procedure described above by the reaction between N-methyl-N-(4-(trifluoromethyl)phenyl)methacrylamide (**1i**) with pivalaldehyde (**2a**), and purified by flash column chromatography as light yellow oil (47.24 mg, 79%).

<sup>1</sup>H NMR (400 MHz, CDCl<sub>3</sub>)  $\delta$  7.55 (d, *J* = 8.0 Hz, 1H), 7.42 (s, 1H), 6.91 (d, *J* = 8.0 Hz, 1H), 3.25 (s, 3H), 2.19 (d, *J* = 14.4 Hz, 1H), 1.89 (d, *J* = 14.4 Hz, 1H), 1.32 (s, 3H), 0.60 (s, 9H). <sup>13</sup>C NMR (100 MHz, CDCl<sub>3</sub>)  $\delta$  181.04, 181.04, 145.97, 135.02, 131.36 – 131.16 (m), 126.01, 125.49 (q, *J* = 3.9 Hz), 124.67, 124.35, 123.31, 121.02 (q, *J* = 3.6 Hz), 107.87, 50.98, 47.53, 31.92, 30.93, 28.26, 26.58.

**(3j) 1,3-dimethyl-3-neopentyl-2-oxindoline-5-carbonitrile**

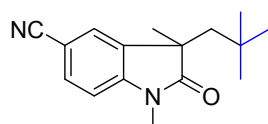

The title compound was prepared according to the general procedure described above by the reaction between N-(4-cyanophenyl)-N-methylmethacrylamide (**1j**) with pivalaldehyde (**2a**), and purified by flash column chromatography as light white solid (38.40 mg, 75%).

M.p. 174-175 °C; <sup>1</sup>H NMR (400 MHz, CDCl<sub>3</sub>)  $\delta$  7.61 (s, 1H), 7.44 (s, 1H), 6.92 (s, 1H), 3.25 (s, 3H), 2.18 (d, *J* = 14.4 Hz, 1H), 1.87 (d, *J* = 14.4 Hz, 1H), 1.31 (s, 3H), 0.61 (s, 9H). <sup>13</sup>C NMR (100 MHz, CDCl<sub>3</sub>)  $\delta$  180.63, 146.80, 135.42, 133.09, 127.14, 119.47, 108.59, 105.21, 50.85, 47.29, 31.87, 30.93, 28.17, 26.56. IR (cm<sup>-1</sup>): 2941, 2216, 1717, 1607, 1499, 1346, 813. MS (EI) *m/z*(%): 256(68)[M]<sup>+</sup>, 201(31), 186(100), 155(13).

**(3k) 1,3,7-trimethyl-3-neopentylindolin-2-one** <sup>2</sup>



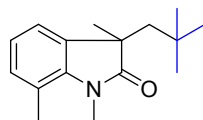

The title compound was prepared according to the general procedure described above by the reaction between N-methyl-N-(o-tolyl)methacrylamide (**1j**) with pivalaldehyde (**2a**), and purified by flash column chromatography as light yellow oil (23.03 mg, 47%).

<sup>1</sup>H NMR (400 MHz, CDCl<sub>3</sub>) δ 7.03 (d, *J* = 7.2 Hz, 1H), 6.98 (d, *J* = 7.2 Hz, 1H), 6.91 (t, *J* = 7.4 Hz, 1H), 3.50 (s, 3H), 2.59 (s, 3H), 2.13 (d, *J* = 14.4 Hz, 1H), 1.82 (d, *J* = 14.4 Hz, 1H), 1.27 (s, 3H), 0.61 (s, 9H). <sup>13</sup>C NMR (100 MHz, CDCl<sub>3</sub>) δ 181.91, 140.75, 134.91, 131.31, 121.97, 121.95, 119.70, 51.11, 46.82, 31.89, 30.95, 29.70, 28.78, 19.22.

### (3l) 1,3,6-trimethyl-3-neopentylindolin-2-one and 1,3,4-trimethyl-3-neopentylindolin-2-one

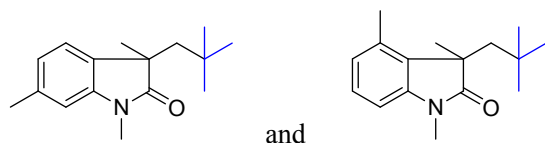

[A mixture of regio-isomers (1,3,5-trimethyl-3-neopentylindolin-2-one and 1,3,4-trimethyl-3-neopentylindolin-2-one) in a ratio of 66:34]

The title compound was prepared according to the general procedure described above by the reaction between N-methyl-N-(m-tolyl)methacrylamide (**1k**) with pivalaldehyde (**2a**), and purified by flash column chromatography as light yellow oil (38.22 mg, 78%).

<sup>1</sup>H NMR (400 MHz, CDCl<sub>3</sub>) δ 7.17 (t, *J* = 7.7 Hz, 0.38×1H), 7.07 (d, *J* = 7.4 Hz, 0.69×1H), 6.84 (d, *J* = 7.3 Hz, 0.67×1H), 6.80 (d, *J* = 7.7 Hz, 0.36×1H), 6.69 (d, *J* = 13.1 Hz, 1H), 3.20 (s, 3H), 2.39 (s, 3H), 2.15-2.09 (m, 0.76×2H), 1.83 (d, *J* = 14.4 Hz, 0.36×2H), 1.36 (s, 0.34×3H), 1.27 (s, 0.70×3H), 0.62 (d, *J* = 7.4 Hz, 9H). <sup>13</sup>C NMR (100 MHz, CDCl<sub>3</sub>) δ 181.47, 181.14, 143.18, 142.97, 137.63, 134.97, 131.26, 127.55, 125.00, 123.69, 122.60, 109.06, 105.86, 50.83, 49.18, 48.27, 47.27, 31.82, 30.91, 30.09, 28.46, 26.37, 26.27, 25.34, 21.87, 18.83. HRMS: calcd. for [M+H]<sup>+</sup>C<sub>16</sub>H<sub>24</sub>NO: 246.18538; found: 246.18524.

### (3m) 7-chloro-1,3-dimethyl-3-neopentylindolin-2-one

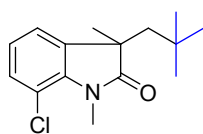

The title compound was prepared according to the general procedure described above by the reaction between N-(2-chlorophenyl)-N-methylmethacrylamide (**1l**) with pivalaldehyde (**2a**), and purified by flash column chromatography as light yellow oil (31.27 mg, 59%).

<sup>1</sup>H NMR (400 MHz, CDCl<sub>3</sub>) δ 7.18 (d, *J* = 7.6 Hz, 1H), 7.07 (d, *J* = 6.8 Hz, 1H), 6.93 (t, *J* = 7.6 Hz, 1H), 3.59 (s, 3H), 2.15 (d, *J* = 14.4 Hz, 1H), 1.83 (d, *J* = 14.3 Hz, 1H), 1.28 (s, 3H), 0.62 (s, 9H).

<sup>13</sup>C NMR (100 MHz, CDCl<sub>3</sub>) δ 181.31, 138.88, 137.17, 129.97, 122.87, 122.48, 115.58, 51.17, 47.31, 31.93, 30.98, 29.71, 28.70. IR (cm<sup>-1</sup>): 2957, 1718, 1605, 1583, 1470, 1364, 739. IR (cm<sup>-1</sup>): 2957, 1718, 1605, 1617, 1583, 1473, 1470, 1364, 739; HRMS: calcd. for [M+H]<sup>+</sup>C<sub>15</sub>H<sub>21</sub>NOCl: 266.13112; found: 266.13062.

### (3n) 6,7-dichloro-1,3-dimethyl-3-neopentylindolin-2-one

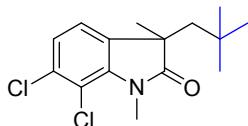

The title compound was prepared according to the general procedure described above by the reaction between N-(2,3-dichlorophenyl)-N-methylmethacrylamide (**1m**) with pivalaldehyde (**2a**), and purified by flash column chromatography as light yellow oil (38.27 mg, 64%).

M.p. 75-76 °C; <sup>1</sup>H NMR (400 MHz, CDCl<sub>3</sub>) δ 7.14 (d, *J* = 8.0 Hz, 1H), 7.01 (d, *J* = 7.6 Hz, 1H), 3.62 (s, 3H), 2.16 (d, *J* = 14.4 Hz, 1H), 1.82 (d, *J* = 14.4 Hz, 1H), 1.27 (s, 3H), 0.63 (s, 9H). <sup>13</sup>C NMR (100 MHz, CDCl<sub>3</sub>) δ 181.31, 140.68, 135.22, 132.96, 123.63, 122.66, 114.7, 75.10, 47.14, 31.95, 31.02, 30.01, 28.67. IR (cm<sup>-1</sup>): 2960, 2363, 1714, 1602, 1493, 1462, 1362, 807. HRMS: calcd. for [M+H]<sup>+</sup> C<sub>15</sub>H<sub>20</sub>NOCl<sub>2</sub>: 300.09222; found: 266.09165.

### (3o) 3-(methoxymethyl)-1-methyl-3-neopentylindolin-2-one

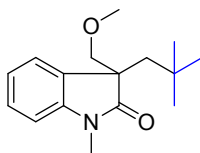

The title compound was prepared according to the general procedure described above by the reaction between N-ethyl-2-(methoxymethyl)-N-phenylacrylamide (**1n**) with pivalaldehyde (**2a**), and purified by flash column chromatography as light yellow solid (45.41 mg, 87%).

M.p. 73-74 °C; <sup>1</sup>H NMR (400 MHz, CDCl<sub>3</sub>) δ 7.30 – 7.27 (m, 2H), 7.03 (t, *J* = 7.6 Hz, 1H), 6.84 (d, *J* = 8.0 Hz, 1H), 3.54 (d, *J* = 8.4 Hz, 1H), 3.44 (d, *J* = 8.8 Hz, 1H), 3.20 (d, *J* = 16.4 Hz, 6H), 2.02 (d, *J* = 14.0 Hz, 1H), 1.92 (d, *J* = 14.4 Hz, 1H), 0.62 (s, 9H). <sup>13</sup>C NMR (100 MHz, CDCl<sub>3</sub>) δ 178.83, 144.02, 131.24, 128.03, 124.89, 121.98, 108.04, 79.48, 59.69, 53.02, 45.66, 31.76, 31.12, 26.40. IR (cm<sup>-1</sup>): 2953, 2365, 1702, 1612, 1468, 1380, 1344, 748. HRMS: calcd. for [M+Na]<sup>+</sup> C<sub>16</sub>H<sub>23</sub>NO<sub>2</sub>Na: 284.16220; found: 284.16210.

### (3p) (1-methyl-3-neopentyl-2-oxoindolin-3-yl)methyl acetate

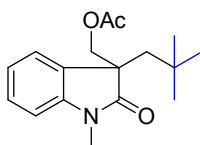

The title compound was prepared according to the general procedure described above by the reaction between 2-(ethyl(phenyl)carbamoyl)allyl acetate (**1o**) with pivalaldehyde (**2a**), and purified by flash column chromatography as light yellow oil (52.60 mg, 91%).

<sup>1</sup>H NMR (400 MHz, CDCl<sub>3</sub>) δ 7.29 (t, *J* = 7.6 Hz, 1H), 7.23 (d, *J* = 7.2 Hz, 1H), 7.03 (t, *J* = 7.6 Hz, 1H), 6.85 (d, *J* = 7.6 Hz, 1H), 4.41 (d, *J* = 10.4 Hz, 1H), 4.01 (d, *J* = 10.4 Hz, 1H), 3.23 (s, 3H), 2.07 (d, *J* = 14.4 Hz, 1H), 1.89 (d, *J* = 14.0 Hz, 1H), 1.81 (s, 3H), 0.64 (s, 9H). <sup>13</sup>C NMR (100 MHz, CDCl<sub>3</sub>) δ 178.05, 170.43, 144.03, 129.66, 128.47, 125.00, 122.18, 108.14, 69.55, 51.66, 45.46, 31.78, 31.07, 26.44, 20.63. IR (cm<sup>-1</sup>): 3060, 2949, 2364, 1719, 1618, 1498, 1467, 1372, 1215, 750. HRMS: calcd. for [M+Na]<sup>+</sup> C<sub>17</sub>H<sub>23</sub>NO<sub>3</sub>Na: 312.15710; found: 312.15701.

### (3q) 1-ethyl-3-methyl-3-neopentylindolin-2-one

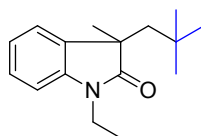

The title compound was prepared according to the general procedure described above by the reaction between N-ethyl-N-phenylmethacrylamide (**1p**) with pivalaldehyde (**2a**), and purified by flash column chromatography as light yellow solid (31.85 mg, 65%).

M.p. 60-61 °C; <sup>1</sup>H NMR (400 MHz, CDCl<sub>3</sub>) δ 7.22 (dd, *J* = 13.6, 8.0 Hz, 2H), 7.02 (t, *J* = 7.6 Hz, 1H), 6.87 (d, *J* = 7.6 Hz, 1H), 3.915-3.826(m, 1H), 3.730-3.641 (m, 1H), 2.16 (d, *J* = 14.4 Hz, 1H), 1.86 (d, *J* = 14.4 Hz, 1H), 1.36 – 1.20 (m, 3H), 0.63 (s, 9H). <sup>13</sup>C NMR (100 MHz, CDCl<sub>3</sub>) δ 180.70, 142.08, 134.59, 127.55, 124.22, 121.83, 108.29, 50.70, 47.53, 34.64, 31.98, 31.02, 28.76, 12.37. IR(cm<sup>-1</sup>): 2955, 2363, 1703, 1610, 1487, 1466, 1374, 753. HRMS: calcd. for [M+H]<sup>+</sup>C<sub>16</sub>H<sub>24</sub>NO: 246.18547; found: 246.18524.

### (3r) 3-methyl-3-neopentyl-1-phenylindolin-2-one

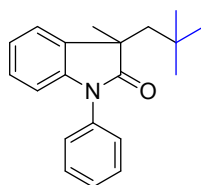

The title compound was prepared according to the general procedure described above by the reaction between N,N-diphenylmethacrylamide (**1q**) with pivalaldehyde (**2a**), and purified by flash column chromatography as white solid (42.19 mg, 72%).

M.p. 103-104 °C; <sup>1</sup>H NMR (400 MHz, CDCl<sub>3</sub>) δ 7.52 (t, *J* = 7.6 Hz, 2H), 7.40 (dd, *J* = 13.6, 7.6 Hz, 3H), 7.27 (d, *J* = 7.6 Hz, 1H), 7.18 (t, *J* = 7.6 Hz, 1H), 7.07 (t, *J* = 7.6 Hz, 1H), 6.86 (d, *J* = 8.0 Hz, 1H), 2.25 (d, *J* = 14.4 Hz, 1H), 1.95 (d, *J* = 14.4 Hz, 1H), 1.42 (s, 3H), 0.73 (s, 9H). <sup>13</sup>C NMR (100 MHz, CDCl<sub>3</sub>) δ 180.43, 142.83, 135.00, 134.12, 129.67, 127.91, 127.55, 126.42, 124.39, 122.56, 109.57, 51.13, 47.73, 32.10, 31.15, 29.03. IR(cm<sup>-1</sup>): 2949, 2363, 1713, 1608, 1496, 1470, 1375, 754, 692.

### (3s) 1-benzyl-3-methyl-3-neopentylindolin-2-one

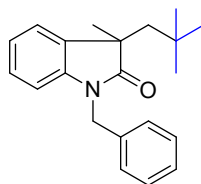

The title compound was prepared according to the general procedure described above by the reaction between N-benzyl-N-phenylmethacrylamide (**1r**) with pivalaldehyde (**2a**), and purified by flash column chromatography as light yellow solid (38.07 mg, 62%).

M.p. 107-108 °C; <sup>1</sup>H NMR (400 MHz, CDCl<sub>3</sub>) δ 7.34 – 7.27 (m, 5H), 7.20 (d, *J* = 7.2 Hz, 1H), 7.14 (d, *J* = 7.6 Hz, 1H), 7.01 (d, *J* = 7.2 Hz, 1H), 6.77 (d, *J* = 7.6 Hz, 1H), 5.06 (d, *J* = 15.6 Hz, 1H), 4.78 (d, *J* = 15.6 Hz, 1H), 2.21 (d, *J* = 14.4 Hz, 1H), 1.90 (d, *J* = 14.4 Hz, 1H), 1.35 (s, 4H), 0.64 (s, 9H). <sup>13</sup>C NMR (100 MHz, CDCl<sub>3</sub>) δ 181.22, 142.20, 136.27, 134.39, 128.82, 127.77, 127.67, 127.54, 124.12, 122.10, 109.26, 50.67, 47.64, 44.08, 32.00, 31.08, 29.19. IR(cm<sup>-1</sup>): 2949, 2356, 1705, 1607, 1493, 1466, 1357, 758, 693. HRMS: calcd. for [M+H]<sup>+</sup> C<sub>21</sub>H<sub>26</sub>NO: 308.20102, found: 308.20089.

**(4b) 3-isobutyl-1,3-dimethylindolin-2-one**<sup>1</sup>

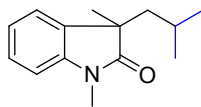

The title compound was prepared according to the general procedure described above by the reaction between N-methyl-N-phenylmethacrylamide (**1a**) with isobutyraldehyde (**2b**), and purified by flash column chromatography as light yellow oil (27.78 mg, 64%).

<sup>1</sup>H NMR (400 MHz, CDCl<sub>3</sub>) δ 7.26 (t, *J* = 7.6 Hz, 1H), 7.16 (d, *J* = 7.2 Hz, 1H), 7.06 (t, *J* = 7.6 Hz, 1H), 6.84 (d, *J* = 7.6 Hz, 1H), 3.22 (s, 3H), 1.94 (dd, *J* = 14.0, 7.6 Hz, 1H), 1.76 (dd, *J* = 14, 5.6 Hz, 1H), 1.32 (s, 3H), 1.24 (m, 1H), 0.65 (d, *J* = 6.8 Hz, 3H), 0.61 (d, *J* = 6.4 Hz, 3H). <sup>13</sup>C NMR (100 MHz, CDCl<sub>3</sub>) δ 181.19, 143.29, 134.31, 127.66, 122.91, 122.43, 108.05, 48.18, 46.84, 26.28, 26.24, 25.63, 24.22, 22.93.

**(4c) 1,3-dimethyl-3-(2-methylbutyl)indolin-2-one**

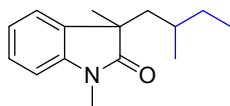

The title compound was prepared according to the general procedure described above by the reaction between N-methyl-N-phenylmethacrylamide (**1a**) with 2-methylbutyraldehyde (**2c**), and purified by flash column chromatography as light yellow oil (34.19 mg, 74%).

<sup>1</sup>H NMR (400 MHz, CDCl<sub>3</sub>) δ 7.30-7.24 (m, 1H), 7.18-7.14 (m, 1H), 7.08-7.03 (m, 1H), 6.86-6.83 (m, 1H), 3.21 (s, 3H), 2.05-2.00 (m, 0.57×1H), 1.86 (d, *J* = 5.7 Hz, 1H), 1.68-1.64 (m, 0.60×1H), 1.33 (s, 3H), 1.16-0.92 (m, 3H), 0.74-0.69 (m, 3H), 0.60 (d, *J* = 6.2 Hz, 0.59×3H), 0.49 (d, *J* = 6.4 Hz, 0.52×3H). <sup>13</sup>C NMR (100 MHz, CDCl<sub>3</sub>) δ 181.40, 143.30, 134.65, 134.13, 127.64, 122.95, 122.88, 122.42, 122.37, 110.09, 108.02, 108.00, 48.26, 48.00, 45.12, 44.51, 31.74, 31.67, 30.82, 30.15, 26.29, 26.23, 25.88, 20.41, 19.37, 11.16, 11.03. IR (cm<sup>-1</sup>): 3059, 2933, 1705, 1607, 1496, 1467, 1374, 756. HRMS: calcd. for [M+H]<sup>+</sup> C<sub>15</sub>H<sub>22</sub>NO: 232.16995, found: 232.16959.

**(4d) 1,3-dimethyl-3-(2-methylpentyl)indolin-2-one**<sup>3</sup>

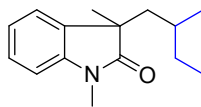

The title compound was prepared according to the general procedure described above by the reaction between N-methyl-N-phenylmethacrylamide (**1a**) with methyl valeraldehyde (**2d**), and purified by flash column chromatography as light yellow oil (36.75 mg, 75%).

<sup>1</sup>H NMR (400 MHz, CDCl<sub>3</sub>) δ 7.28-7.24 (m, 1H), 7.18-7.14 (m, 1H), 7.08-7.03 (m, 1H), 6.85-6.82 (m, 1H), 3.21 (s, 3H), 2.04-1.99 (m, 0.51×1H), 1.86 (d, *J* = 6.0 Hz, 1H), 1.68-1.63 (m, 0.53×1H), 1.33 (s, 3H), 1.26-0.89 (m, 5H), 0.77-0.69 (m, 3H), 0.60 (d, *J* = 6.4 Hz, 0.53×3H), 0.50 (d, *J* = 6.5 Hz, 0.63×3H). <sup>13</sup>C NMR (100 MHz, CDCl<sub>3</sub>) δ 165.97, 142.06, 136.45, 129.64, 127.63, 127.01, 126.92, 124.88, 118.93, 37.85, 29.72, 20.27, 12.49.

**(4e) 3-(cyclohexylmethyl)-1,3-dimethylindolin-2-one**<sup>3</sup>

<sup>3</sup> Z.-J Li, Y. Zhang, L.-Z Zhang, and Z.-Q Liu, *Org. Lett.* **2014**, *16*, 382.

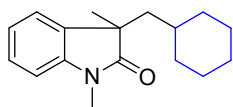

The title compound was prepared according to the general procedure described above by the reaction between N-methyl-N-phenylmethacrylamide (**1a**) with cyclohexanecarbaldehyde (**2e**), and purified by flash column chromatography as light yellow oil (38.55 mg, 75%).

$^1\text{H NMR}$  (400 MHz,  $\text{CDCl}_3$ )  $\delta$  7.26 (s, 1H), 7.15 (d,  $J = 6.4$  Hz, 1H), 7.06 (d,  $J = 6.4$  Hz, 1H), 6.84 (d,  $J = 6.8$  Hz, 1H), 3.22 (s, 3H), 1.92 (dd,  $J = 13.6, 6.0$  Hz, 1H), 1.72 (d,  $J = 13.6$  Hz, 1H), 1.46 (d,  $J = 9.2$  Hz, 3H), 1.31 (s, 3H), 1.20 (d,  $J = 12.4$  Hz, 1H), 1.09 – 0.65 (m, 7H).  $^{13}\text{C NMR}$  (100 MHz,  $\text{CDCl}_3$ )  $\delta$  181.27, 143.15, 134.45, 127.61, 122.80, 122.44, 108.06, 47.95, 45.48, 34.82, 34.53, 33.58, 26.31, 26.17, 26.11.

#### (4f) 3-isopentyl-1,3-dimethylindolin-2-one

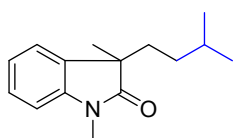

The title compound was prepared according to the general procedure described above by the reaction between N-methyl-N-phenylmethacrylamide (**1a**) with 3-methylbutanal (**2f**), and purified by flash column chromatography as light yellow oil (15.25 mg, 33%).

$^1\text{H NMR}$  (400 MHz,  $\text{CDCl}_3$ )  $\delta$  7.26 (d,  $J = 14.4$  Hz, 1H), 7.16 (d,  $J = 7.2$  Hz, 1H), 7.06 (t,  $J = 7.6$  Hz, 1H), 6.84 (d,  $J = 7.6$  Hz, 1H), 3.21 (s, 3H), 1.92-1.84 (m, 1H), 1.76-1.69 (m, 1H), 1.35 (s, 3H), 0.96 – 0.82 (m, 1H), 0.77 (t,  $J = 6.8$  Hz, 6H).  $^{13}\text{C NMR}$  (100 MHz,  $\text{CDCl}_3$ )  $\delta$  181.03, 143.46, 134.44, 127.68, 122.56, 107.99, 48.49, 36.48, 33.30, 28.28, 26.24, 24.00, 22.61, 22.40. IR (cm $^{-1}$ ): 3057, 2962, 1703, 1610, 1495, 1472, 1387, 753. HRMS: calcd. for  $[\text{M}+\text{H}]^+$   $\text{C}_{15}\text{H}_{22}\text{N}$  O: 232.16998 found: 232.16959.

#### (4g) 3-hexyl-1,3-dimethylindolin-2-one<sup>3</sup>

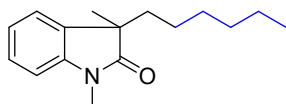

The title compound was prepared according to the general procedure described above by the reaction between N-methyl-N-phenylmethacrylamide (**1a**) with hexanal (**2g**), and purified by flash column chromatography as light yellow oil (21.07 mg, 43%).

$^1\text{H NMR}$  (400 MHz,  $\text{CDCl}_3$ )  $\delta$  7.26 (t,  $J = 8.0$  Hz, 1H), 7.17 (d,  $J = 6.4$  Hz, 1H), 7.07 (t,  $J = 7.2$  Hz, 1H), 6.84 (d,  $J = 7.6$  Hz, 1H), 3.21 (s, 3H), 1.88 (td,  $J = 12.8, 4.4$  Hz, 1H), 1.72 (td,  $J = 12.8, 4.4$  Hz, 1H), 1.35 (s, 3H), 1.27 – 0.89 (m, 8H), 0.80 (t,  $J = 6.8$  Hz, 3H).  $^{13}\text{C NMR}$  (100 MHz,  $\text{CDCl}_3$ )  $\delta$  181.03, 143.44, 134.45, 127.68, 122.58, 122.53, 107.97, 48.59, 38.66, 31.64, 29.52, 26.23, 24.52, 23.92, 22.67, 14.14.

#### (4h) 1,3-dimethyl-3-phenethylindolin-2-one<sup>4</sup>

<sup>4</sup> M.-Bo Zhou, C.-Y Wang, R.-J Song, Y.-L, W.-T Wei, and J.-H Li, *Chem. Commun.* **2013**, 49, 10817.

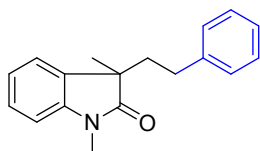

The title compound was prepared according to the general procedure described above by the reaction between N-methyl-N-phenylmethacrylamide (**1a**) with 2-phenylacetaldehyde (**2h**), and purified by flash column chromatography as light yellow oil (30.74mg, 58%).

$^1\text{H}$  NMR (400 MHz,  $\text{CDCl}_3$ )  $\delta$  7.29 (dd,  $J = 15.8, 7.6$  Hz, 1H), 7.21 (dd,  $J = 13.6, 6.8$  Hz, 3H), 7.12 (dd,  $J = 14.8, 7.2$  Hz, 2H), 7.02 (d,  $J = 7.2$  Hz, 2H), 6.87 (d,  $J = 7.6$  Hz, 1H), 3.21 (s, 3H), 2.43 – 2.20 (m, 2H), 2.19 – 2.08 (m, 1H), 2.07 – 1.91 (m, 1H), 1.40 (s, 3H).  $^{13}\text{C}$  NMR (100 MHz,  $\text{CDCl}_3$ )  $\delta$  180.46, 143.53, 141.50, 133.86, 128.39, 128.34, 127.95, 125.95, 122.71, 122.59, 108.13, 48.49, 40.35, 31.08, 26.24, 24.07.

**(4i)1,3-dimethyl-3-(3-phenylpropyl)indolin-2-one**<sup>1</sup>

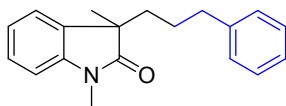

The title compound was prepared according to the general procedure described above by the reaction between N-methyl-N-phenylmethacrylamide (**1a**) with 3-phenylpropanal (**2i**), and purified by flash column chromatography as light yellow oil (25.11 mg, 45%).

$^1\text{H}$  NMR (400 MHz,  $\text{D}_2\text{O}$ )  $\delta$  7.22 (dd,  $J = 13.6, 7.2$  Hz, 3H), 7.13 (t,  $J = 7.2$  Hz, 2H), 7.05 (t,  $J = 7.2$  Hz, 3H), 6.82 (d,  $J = 7.6$  Hz, 1H), 3.20 (s, 3H), 2.80 – 2.28 (m, 2H), 1.96 (td,  $J = 13.2, 4.4$  Hz, 1H), 1.78 (td,  $J = 12.8, 4.0$  Hz, 1H), 1.34 (s, 5H).  $^{13}\text{C}$  NMR (100 MHz,  $\text{CDCl}_3$ )  $\delta$  180.85, 143.42, 142.04, 134.16, 128.48, 128.37, 127.80, 125.87, 122.60, 108.07, 48.49, 38.27, 36.09, 26.51, 26.27, 24.01.

## VI. Copies of <sup>1</sup>H and <sup>13</sup>C NMR spectra of products

7.278  
7.241  
7.206  
7.189  
7.050  
7.032  
7.014  
6.857  
6.838

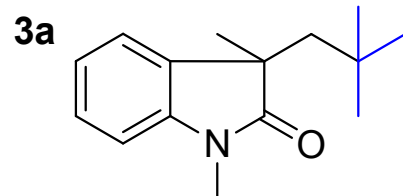

-3.221

2.176  
2.140  
1.877  
1.841

-1.294

-0.611

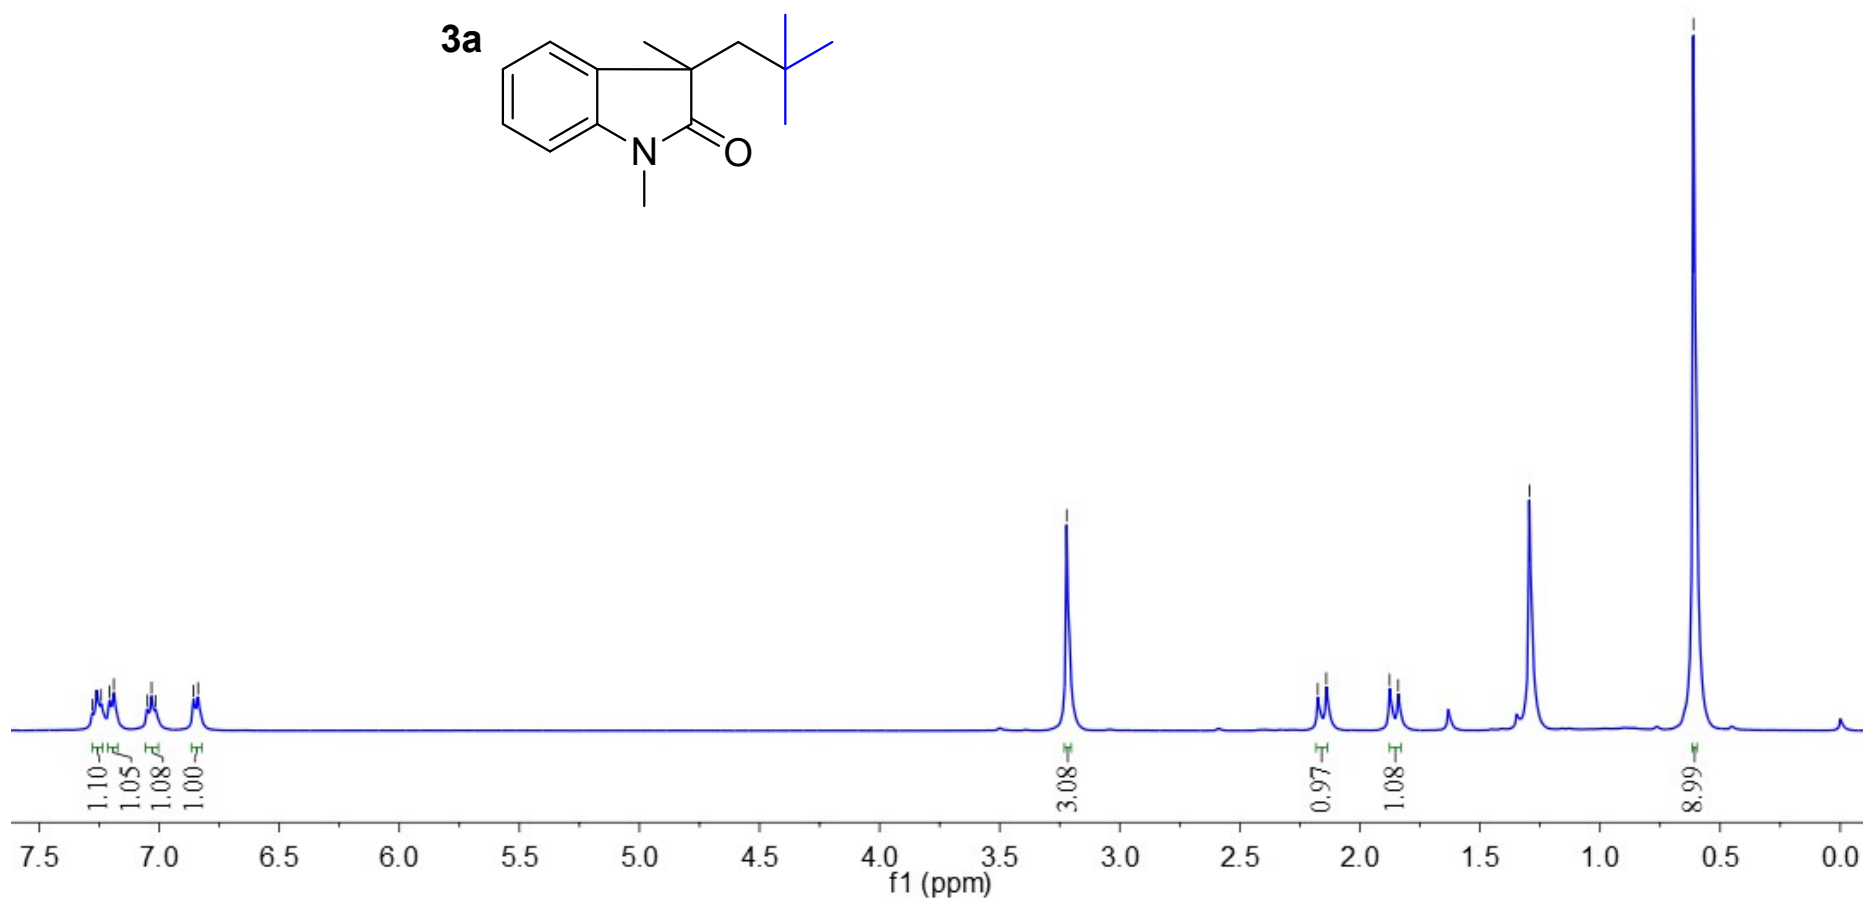

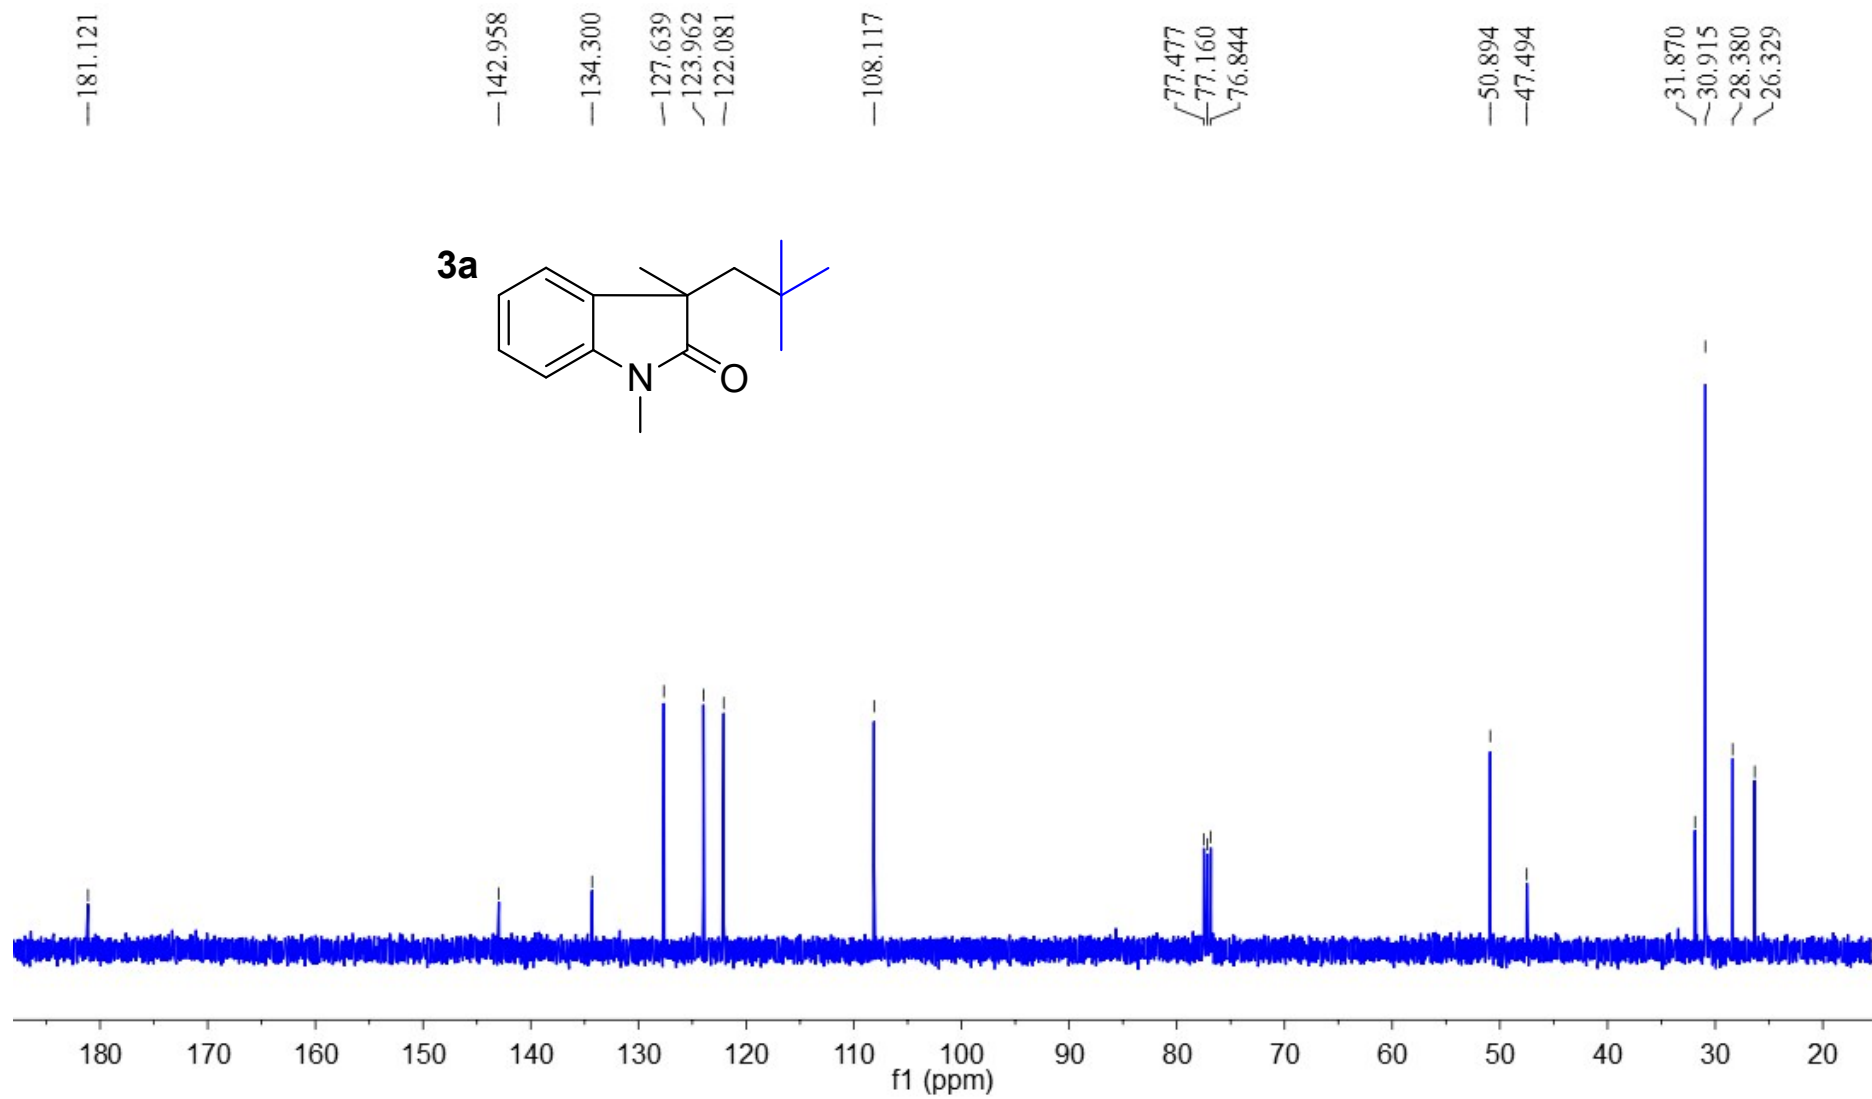



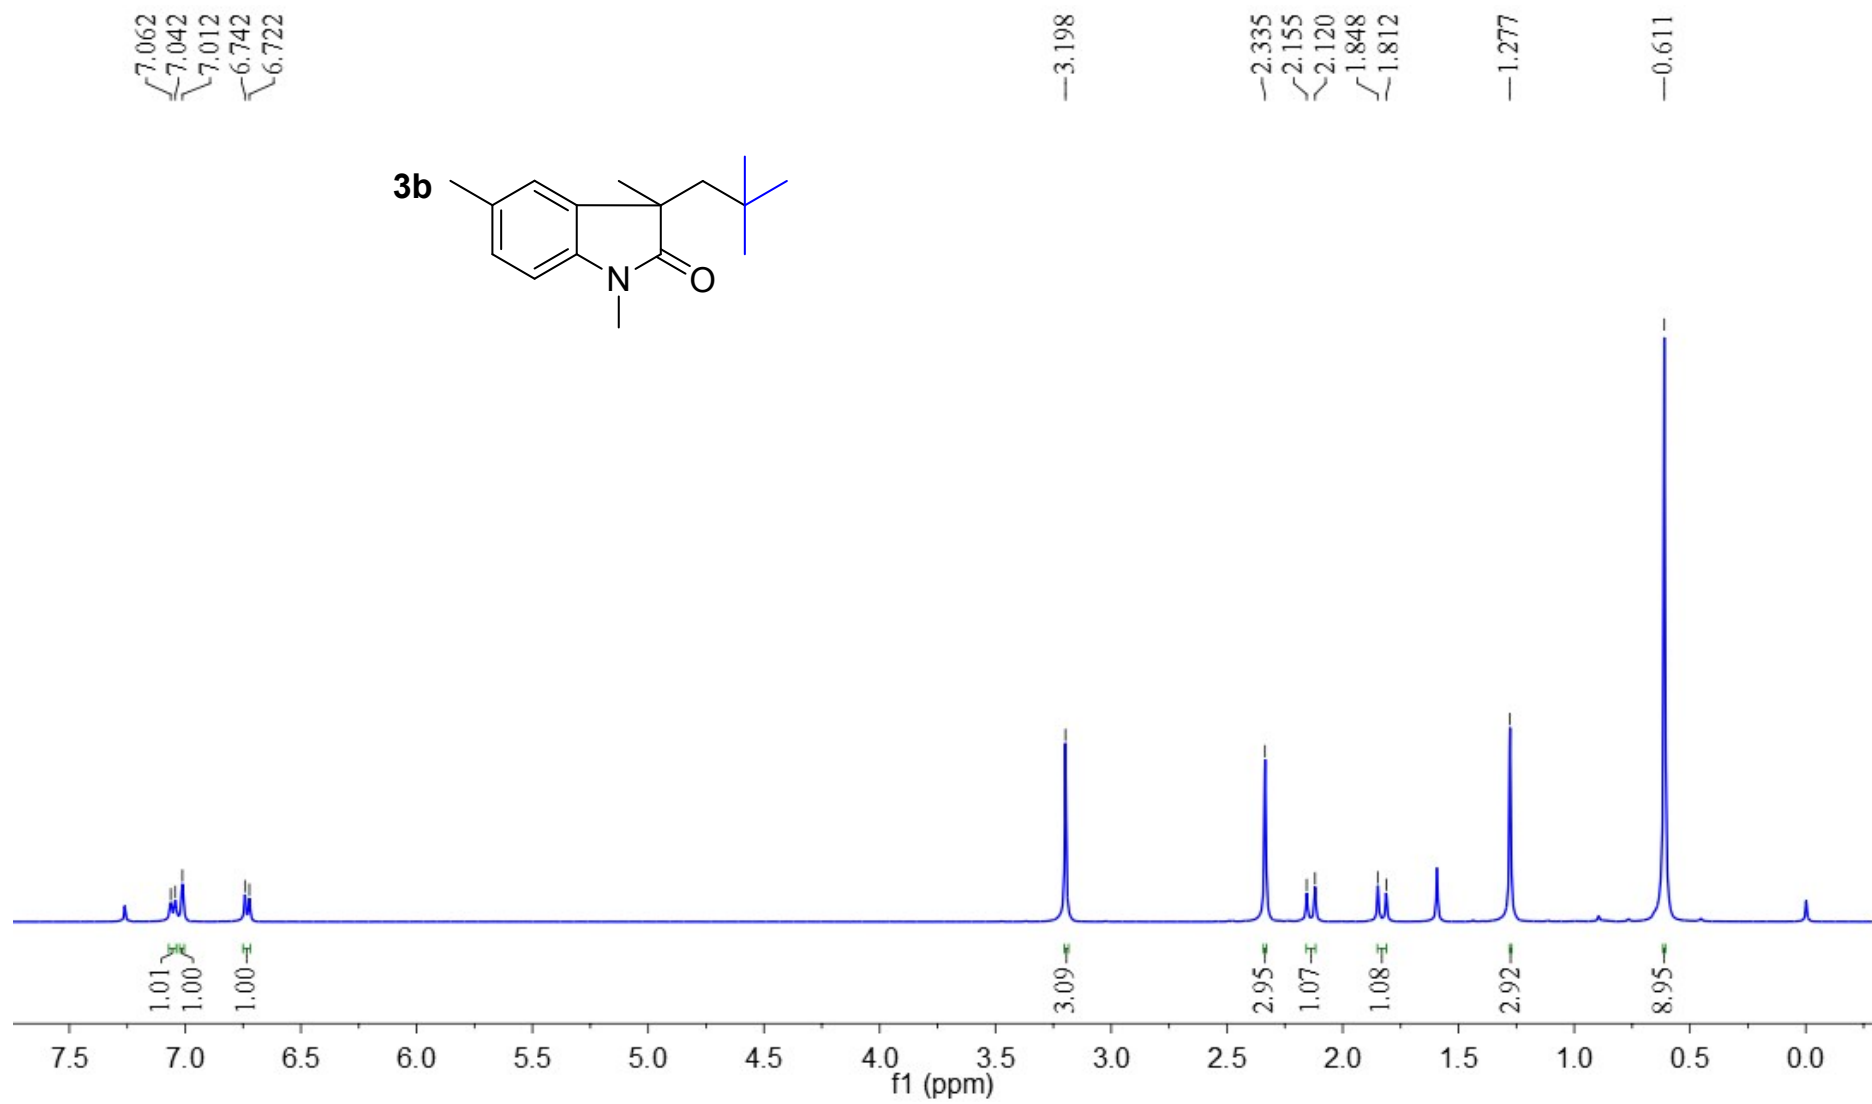

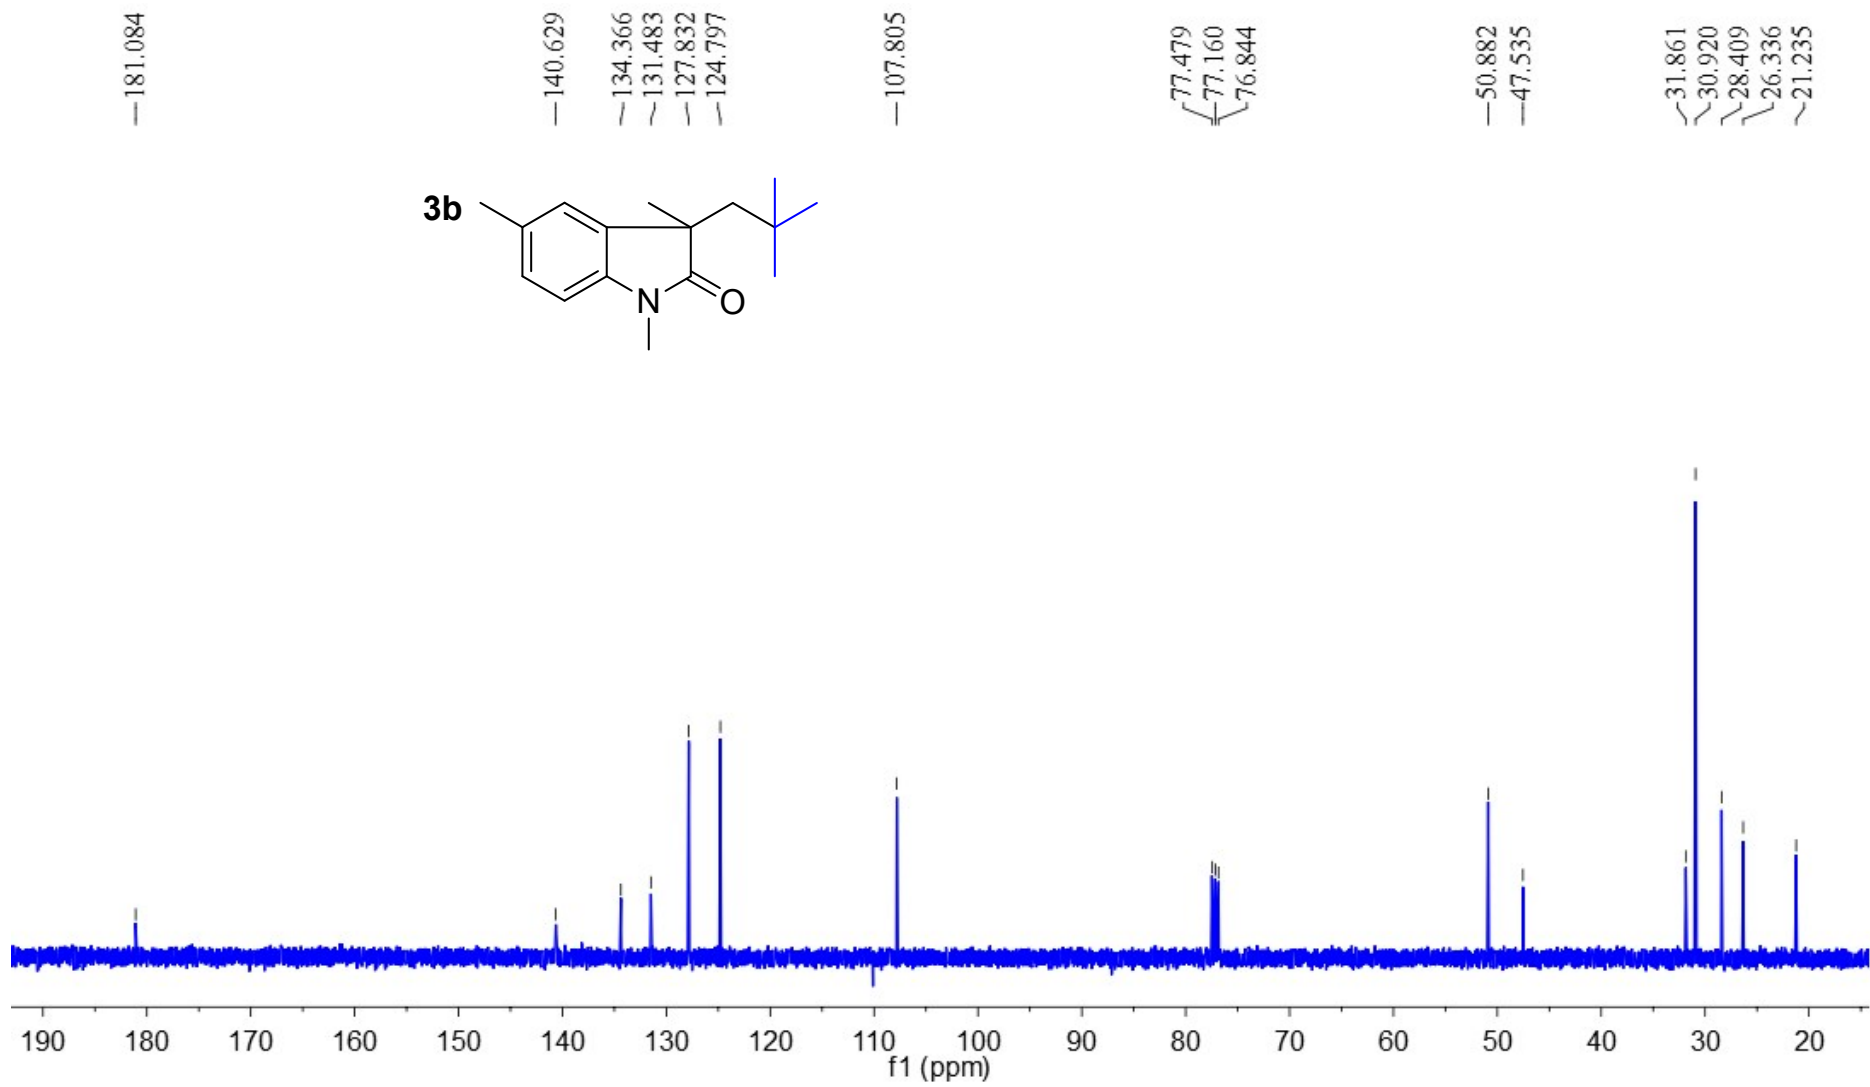

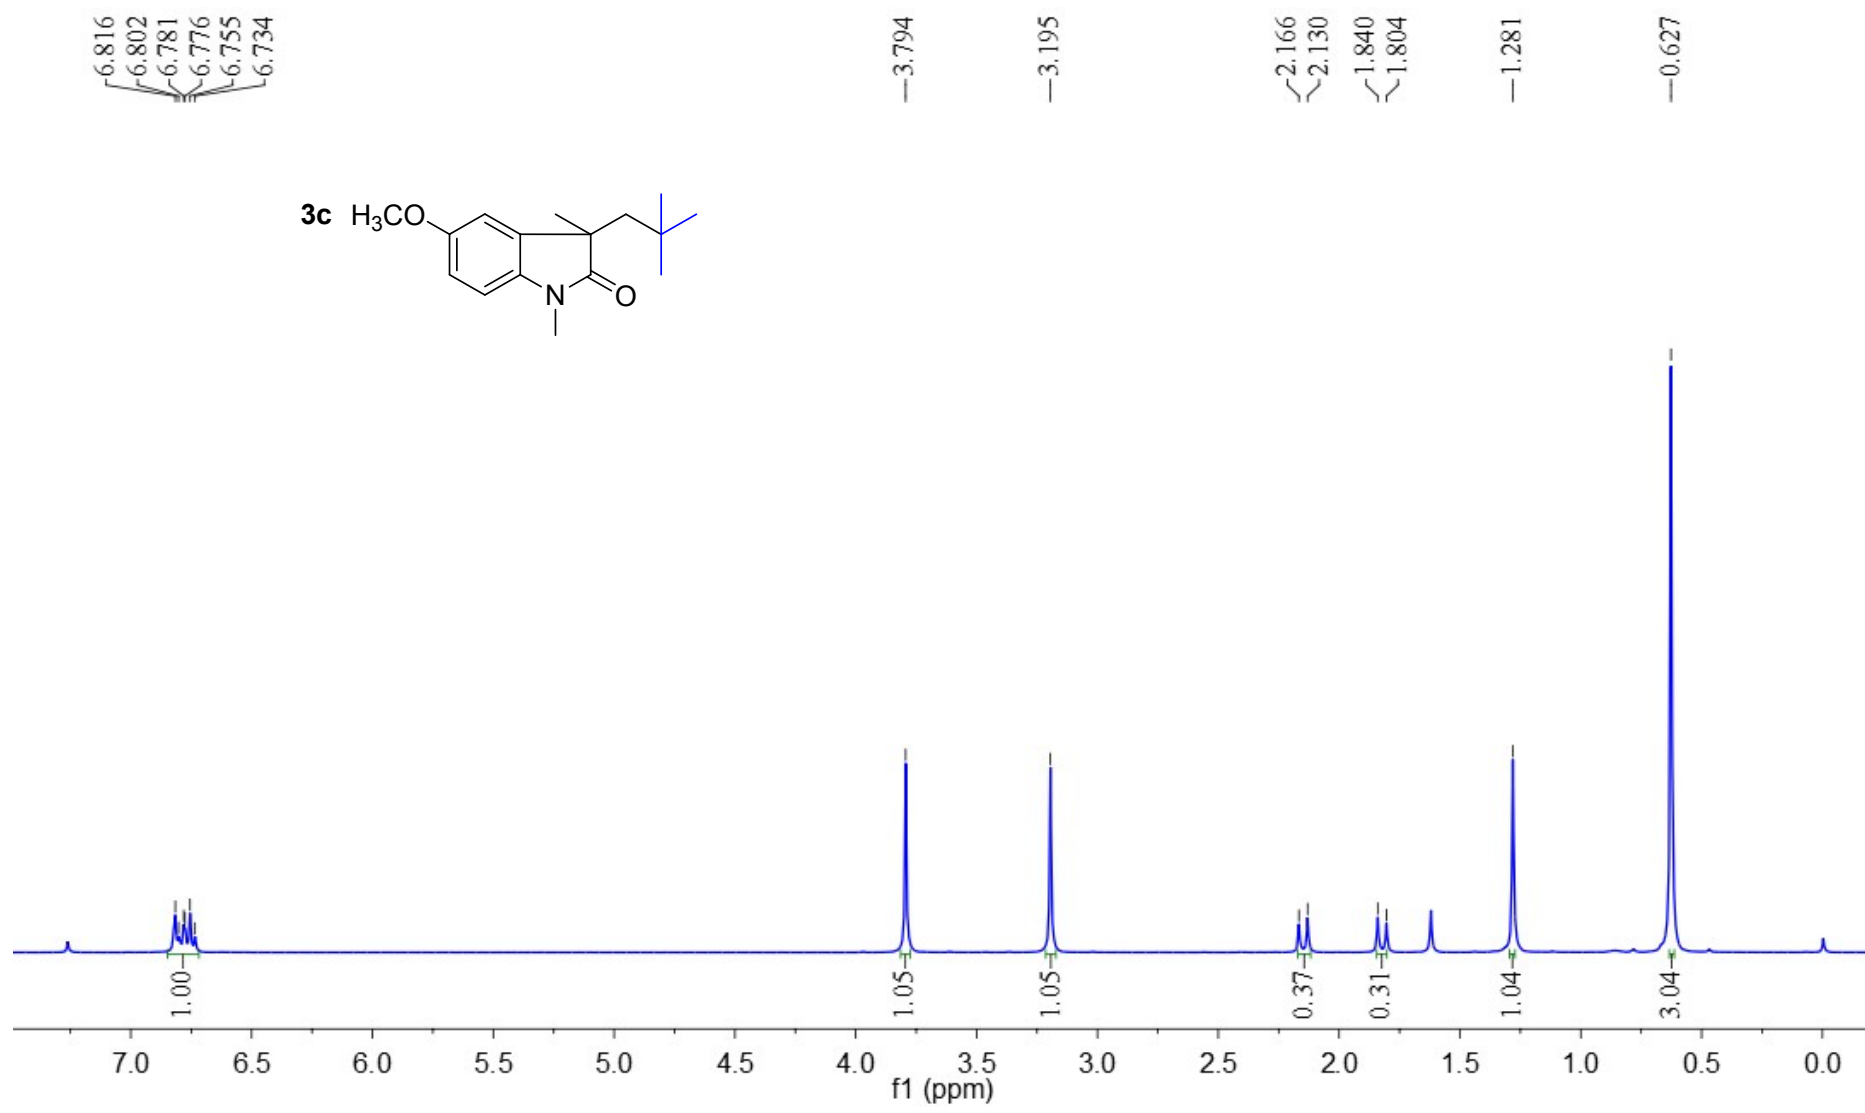

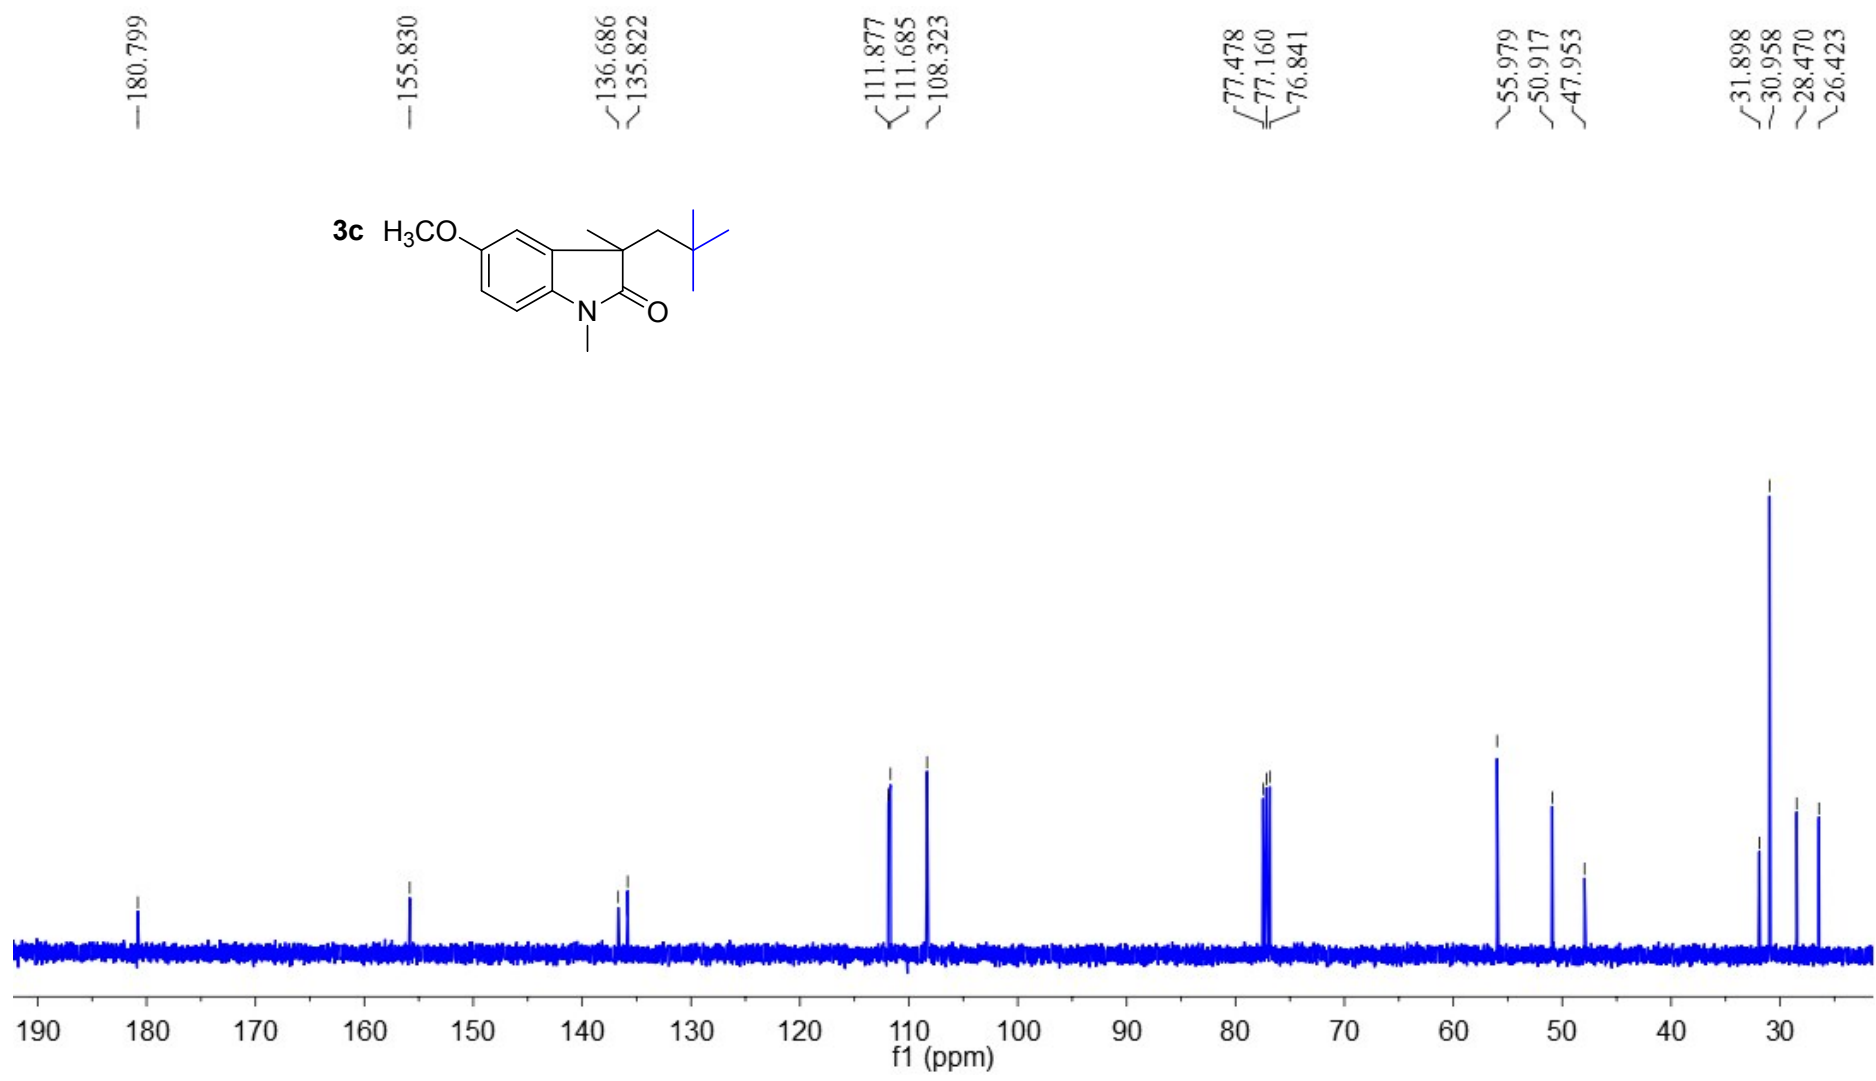

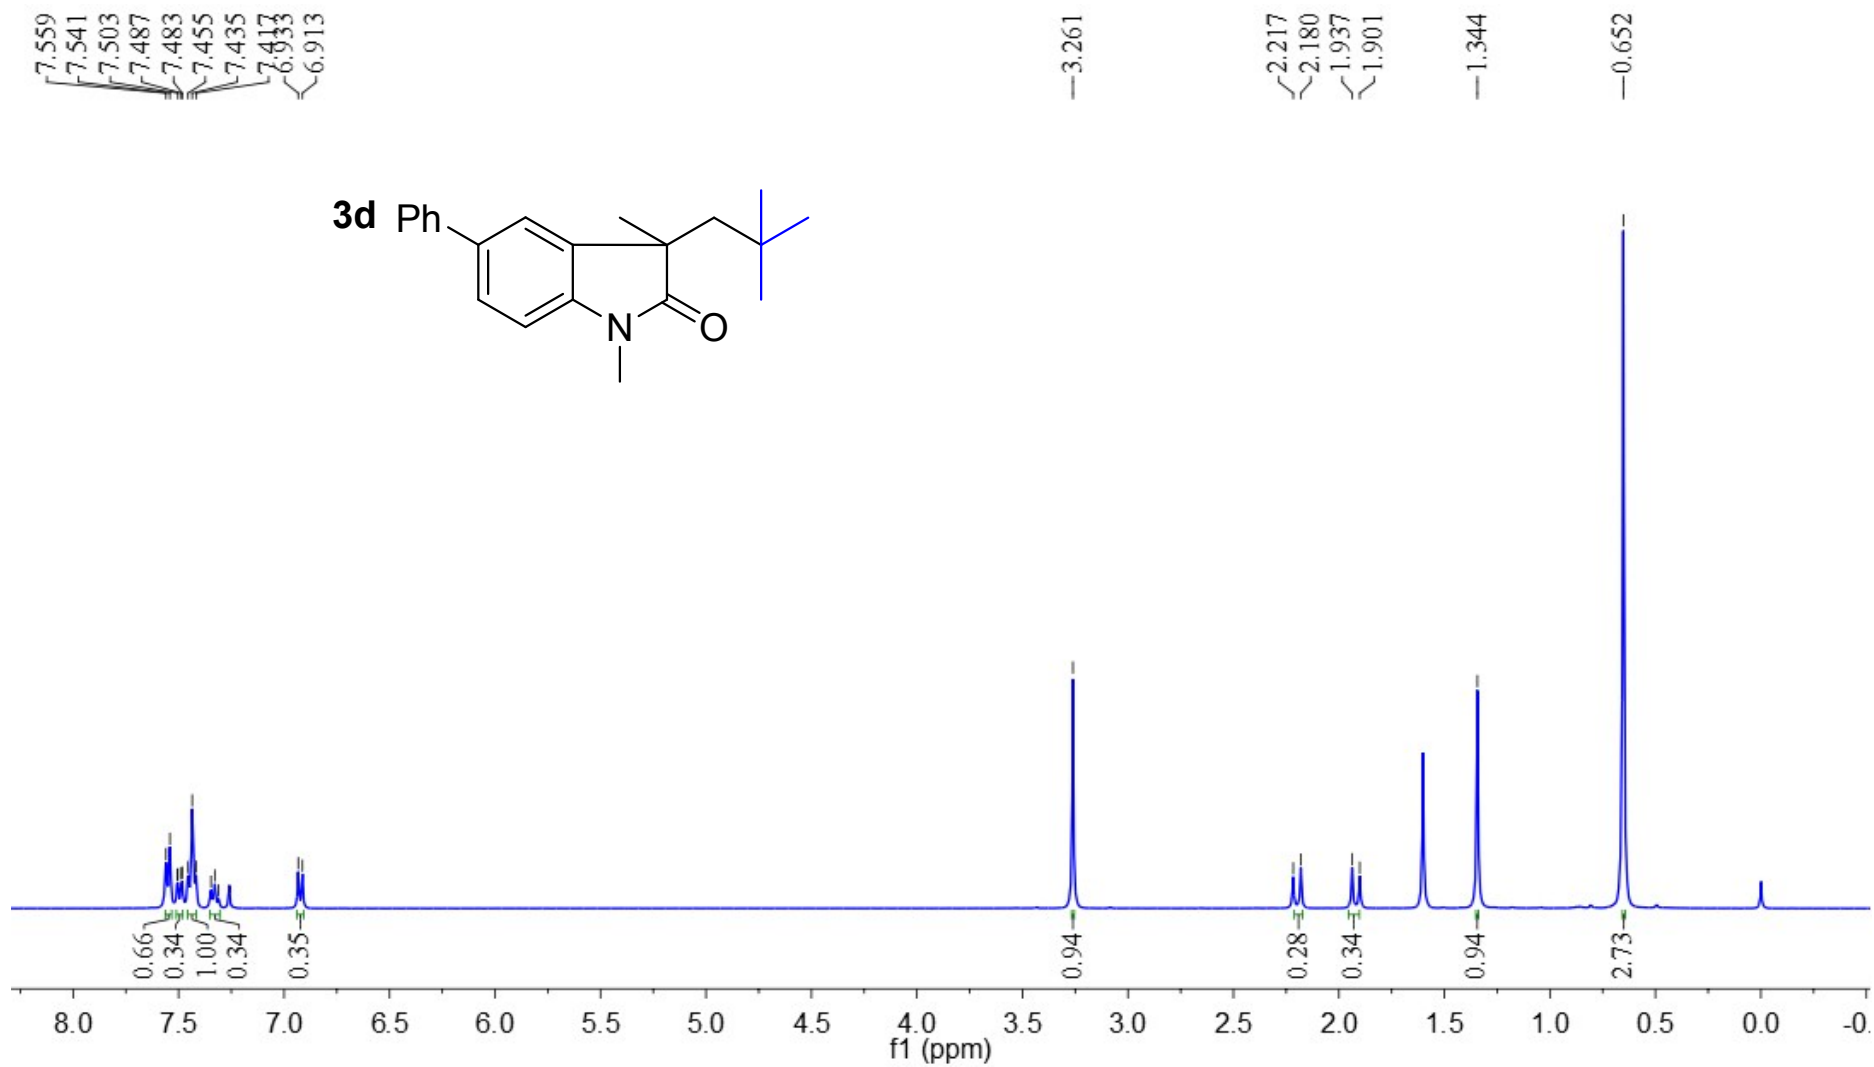

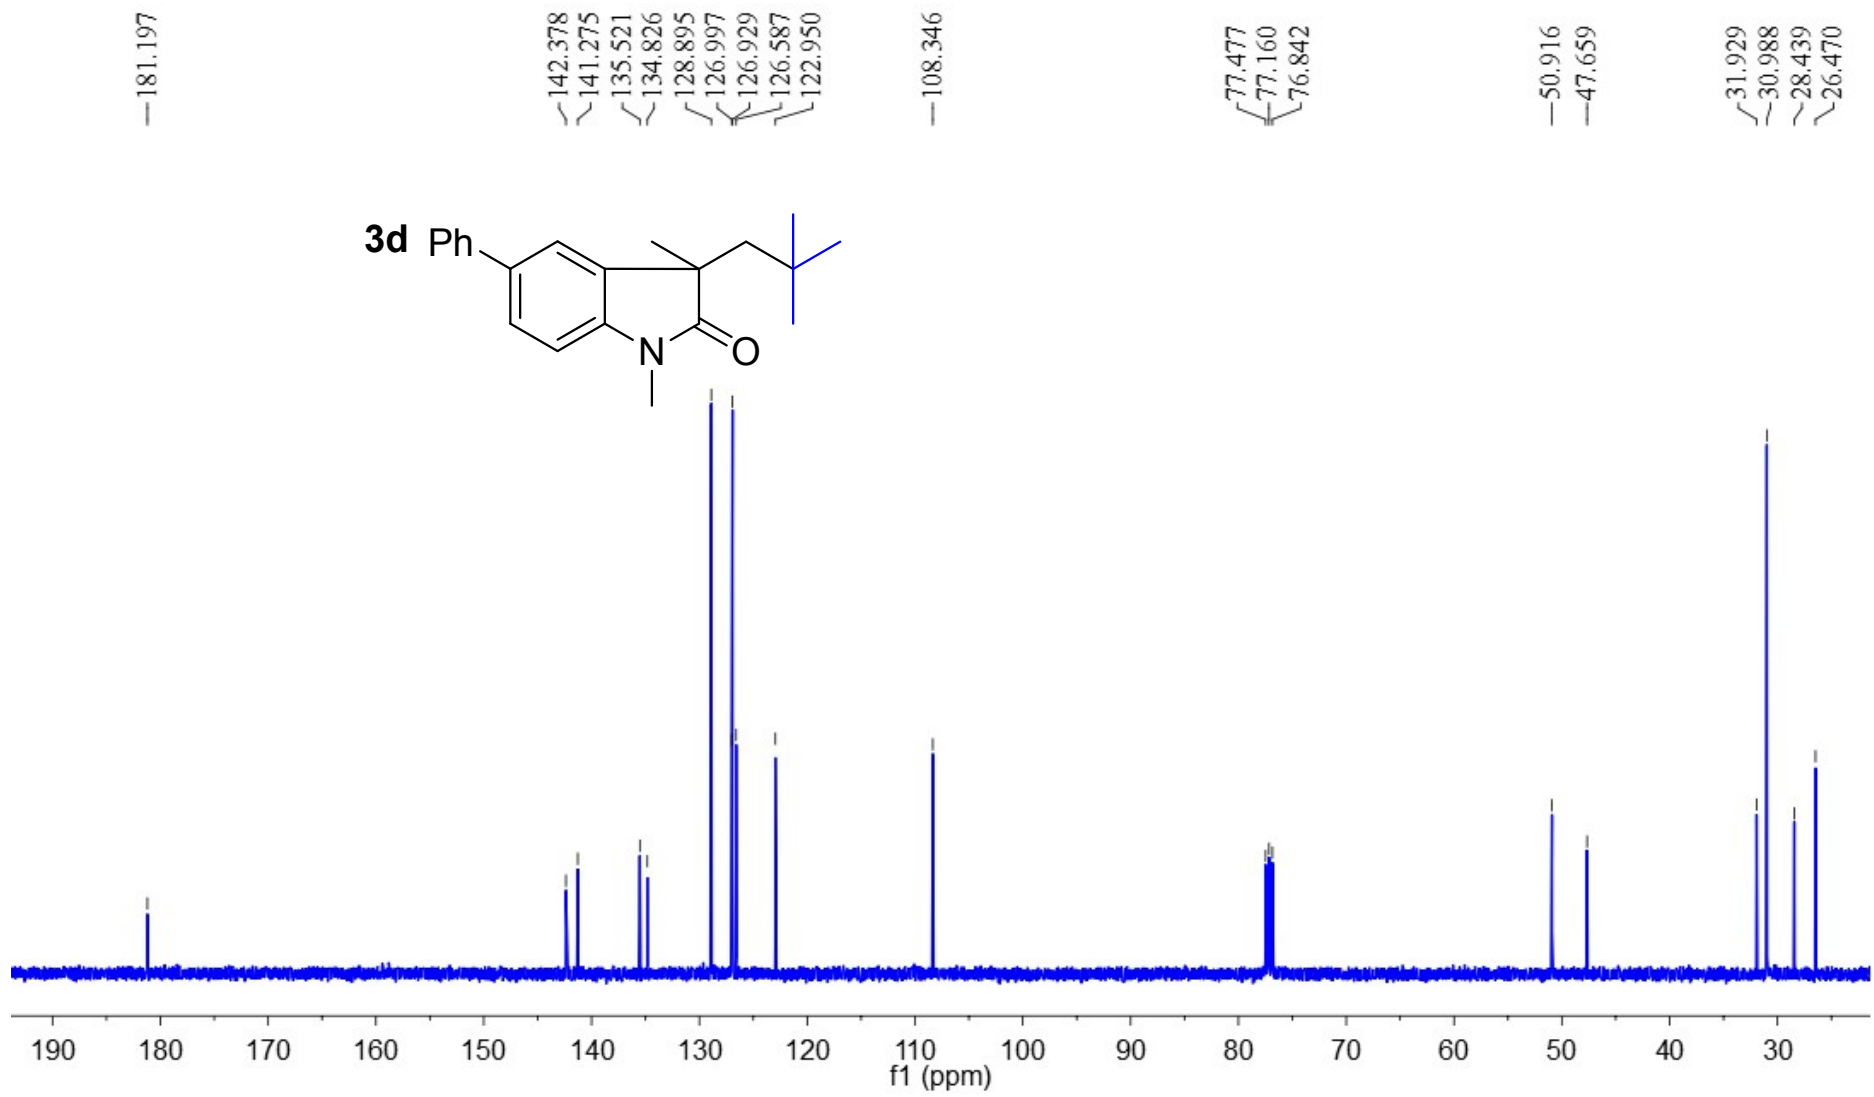

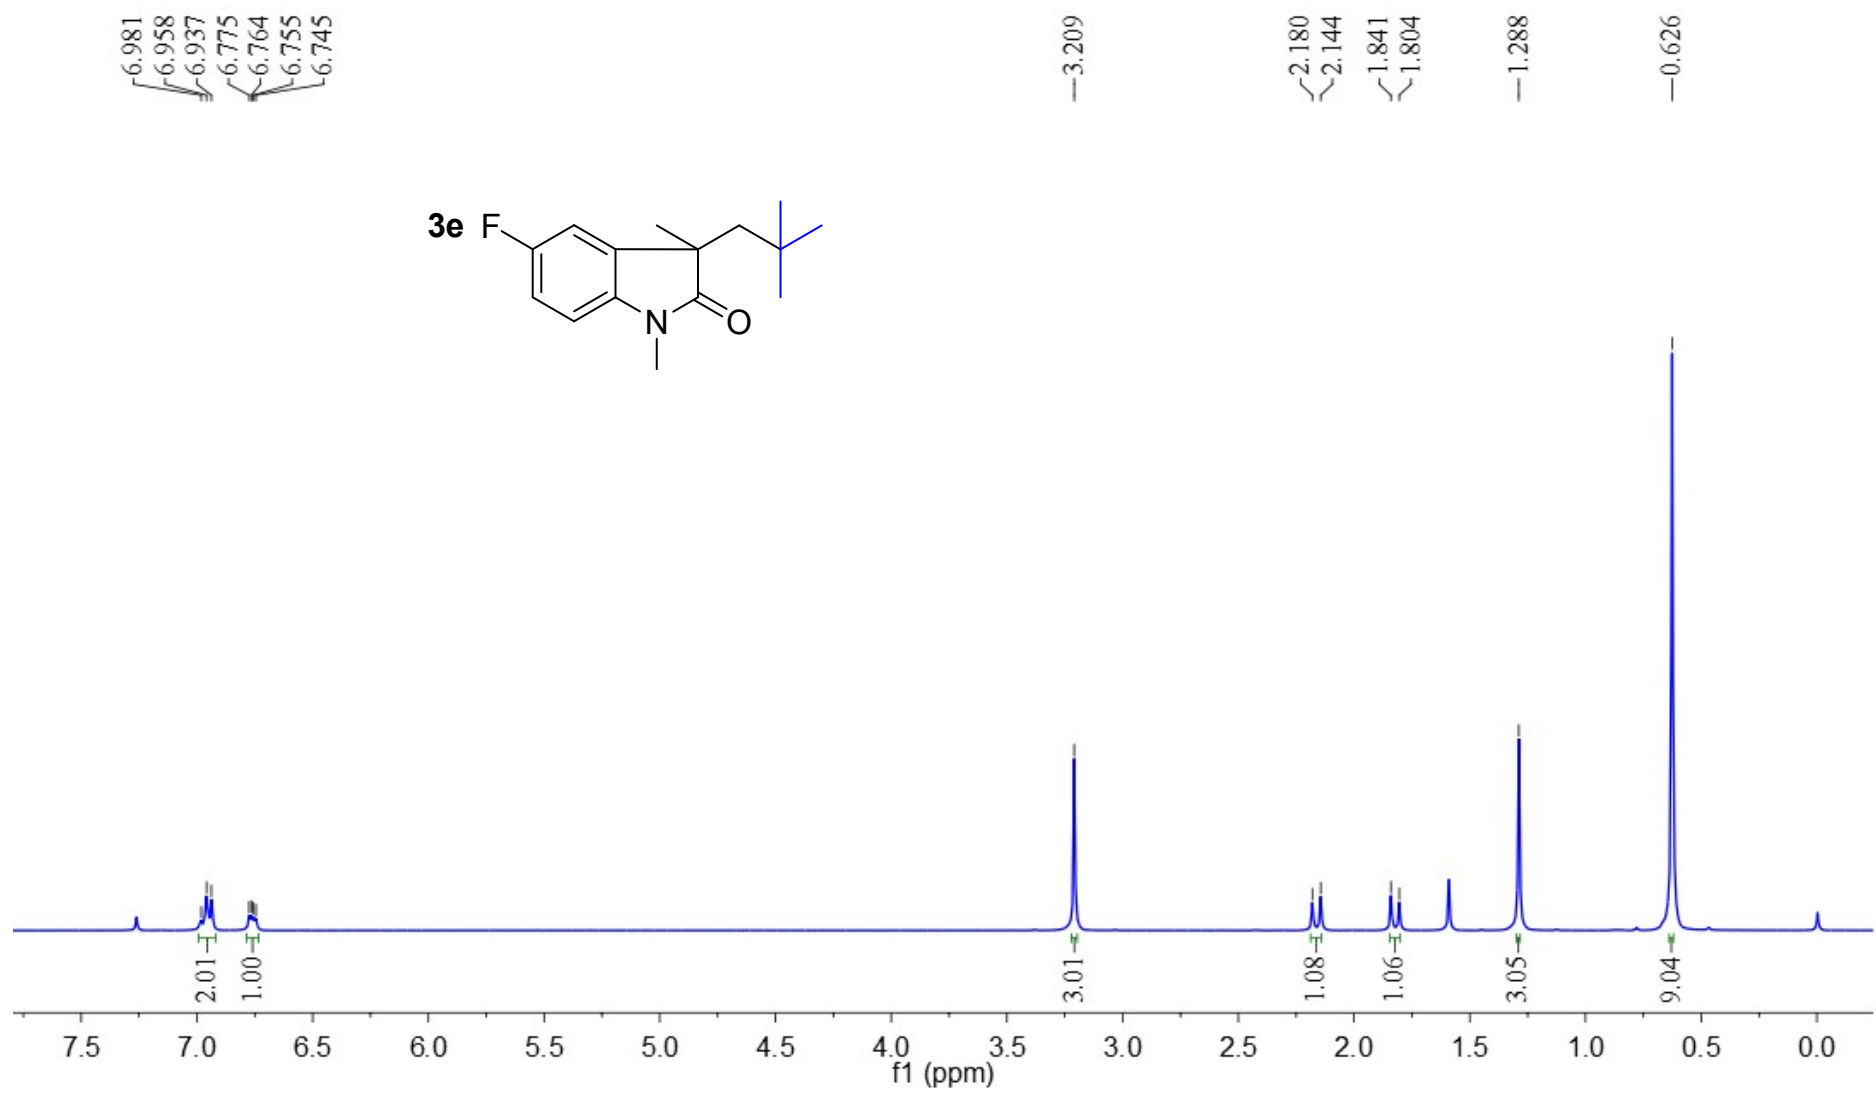

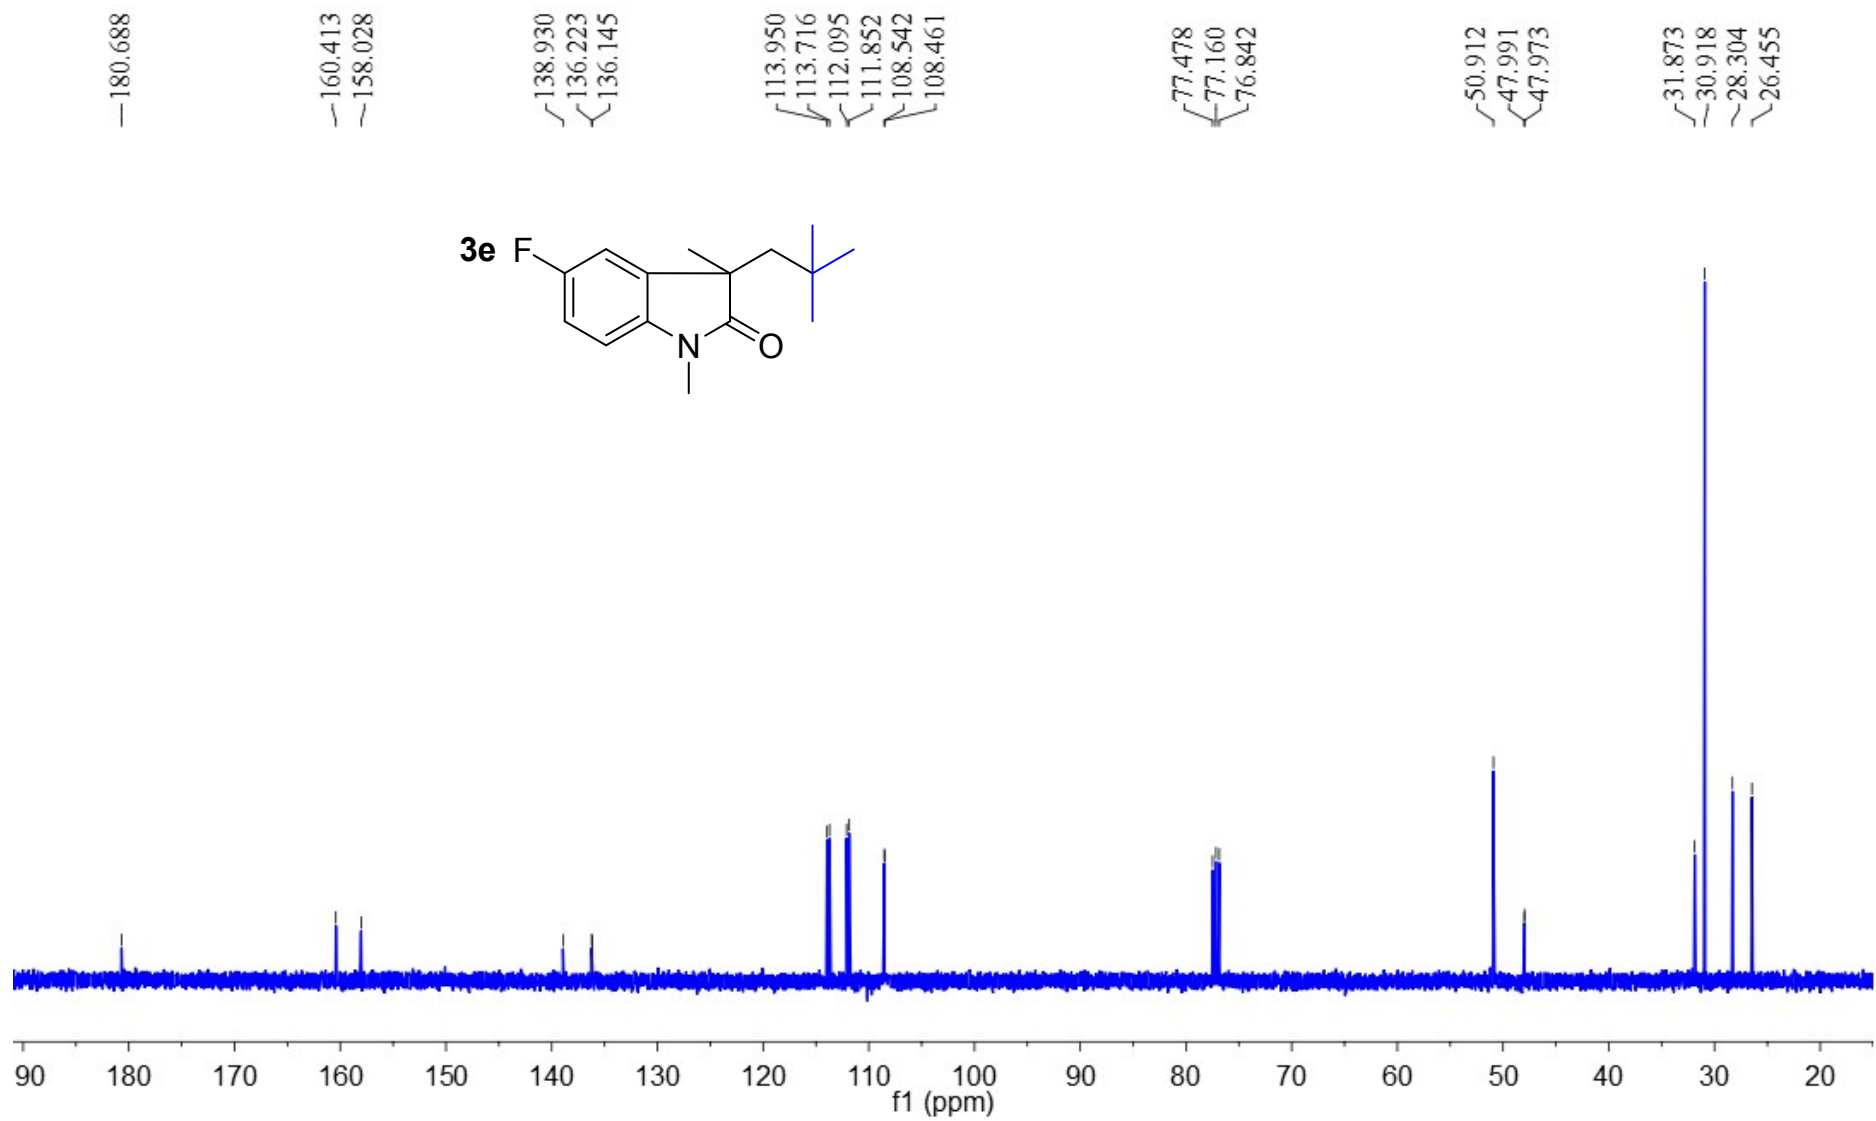



7.261  
7.251  
7.246  
7.225  
7.169  
6.777  
6.757

3f

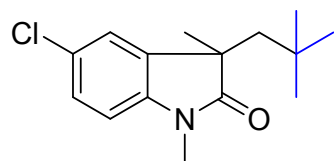

3.206

2.173  
2.137  
1.848  
1.812  
1.576  
1.289

0.626

-0.002

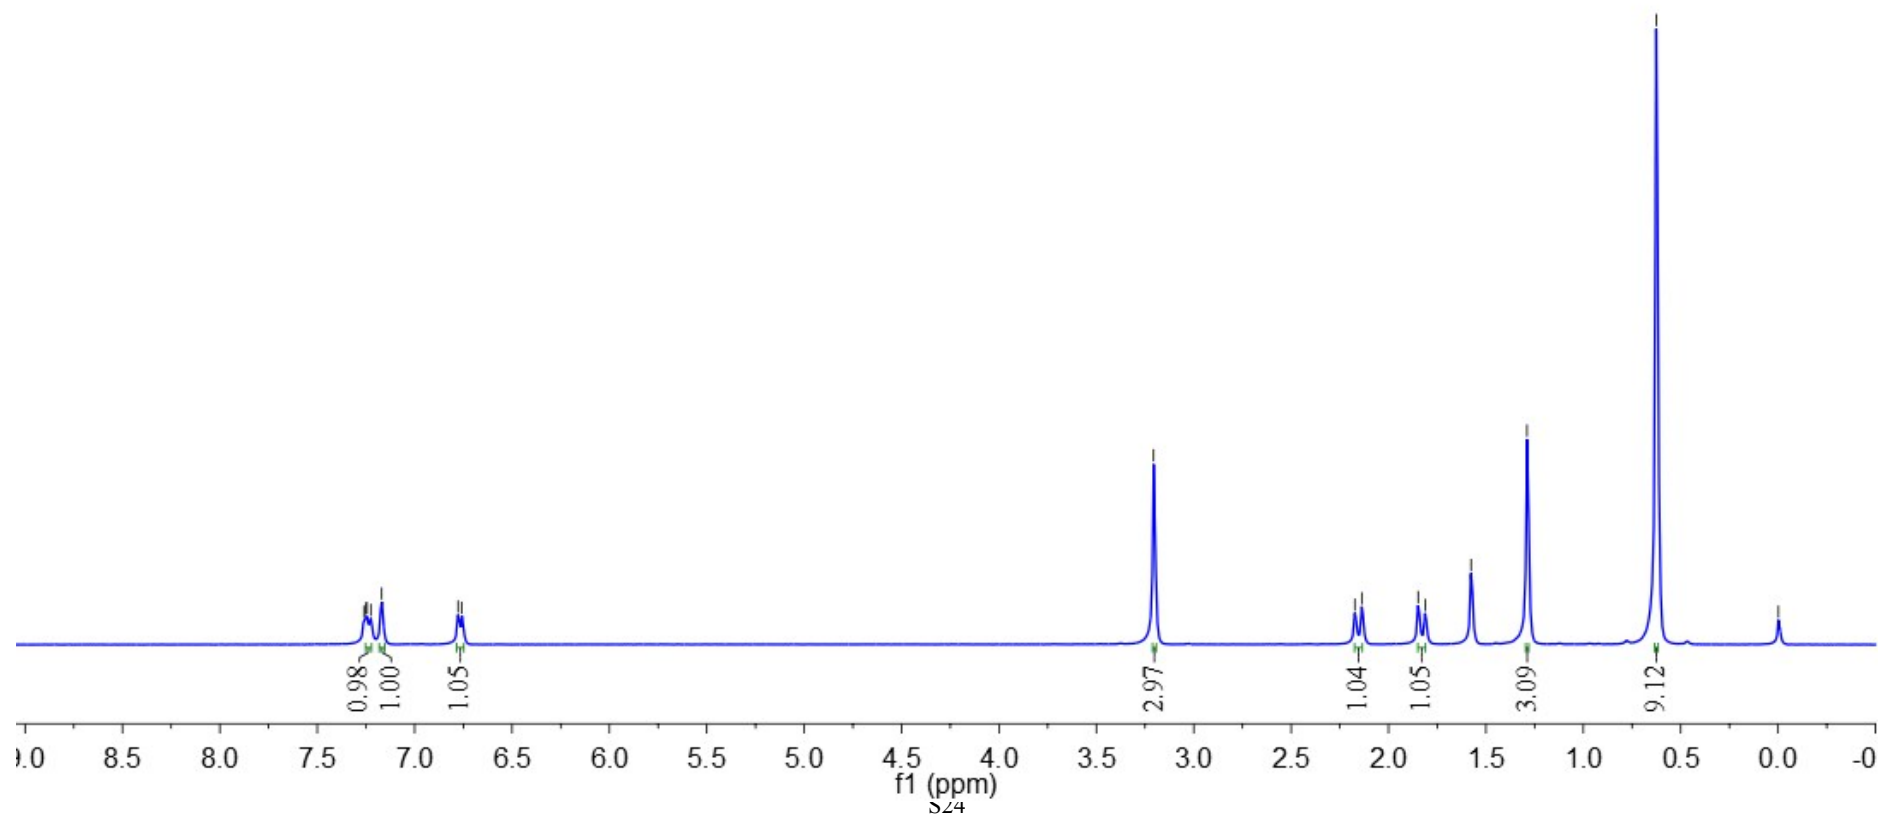

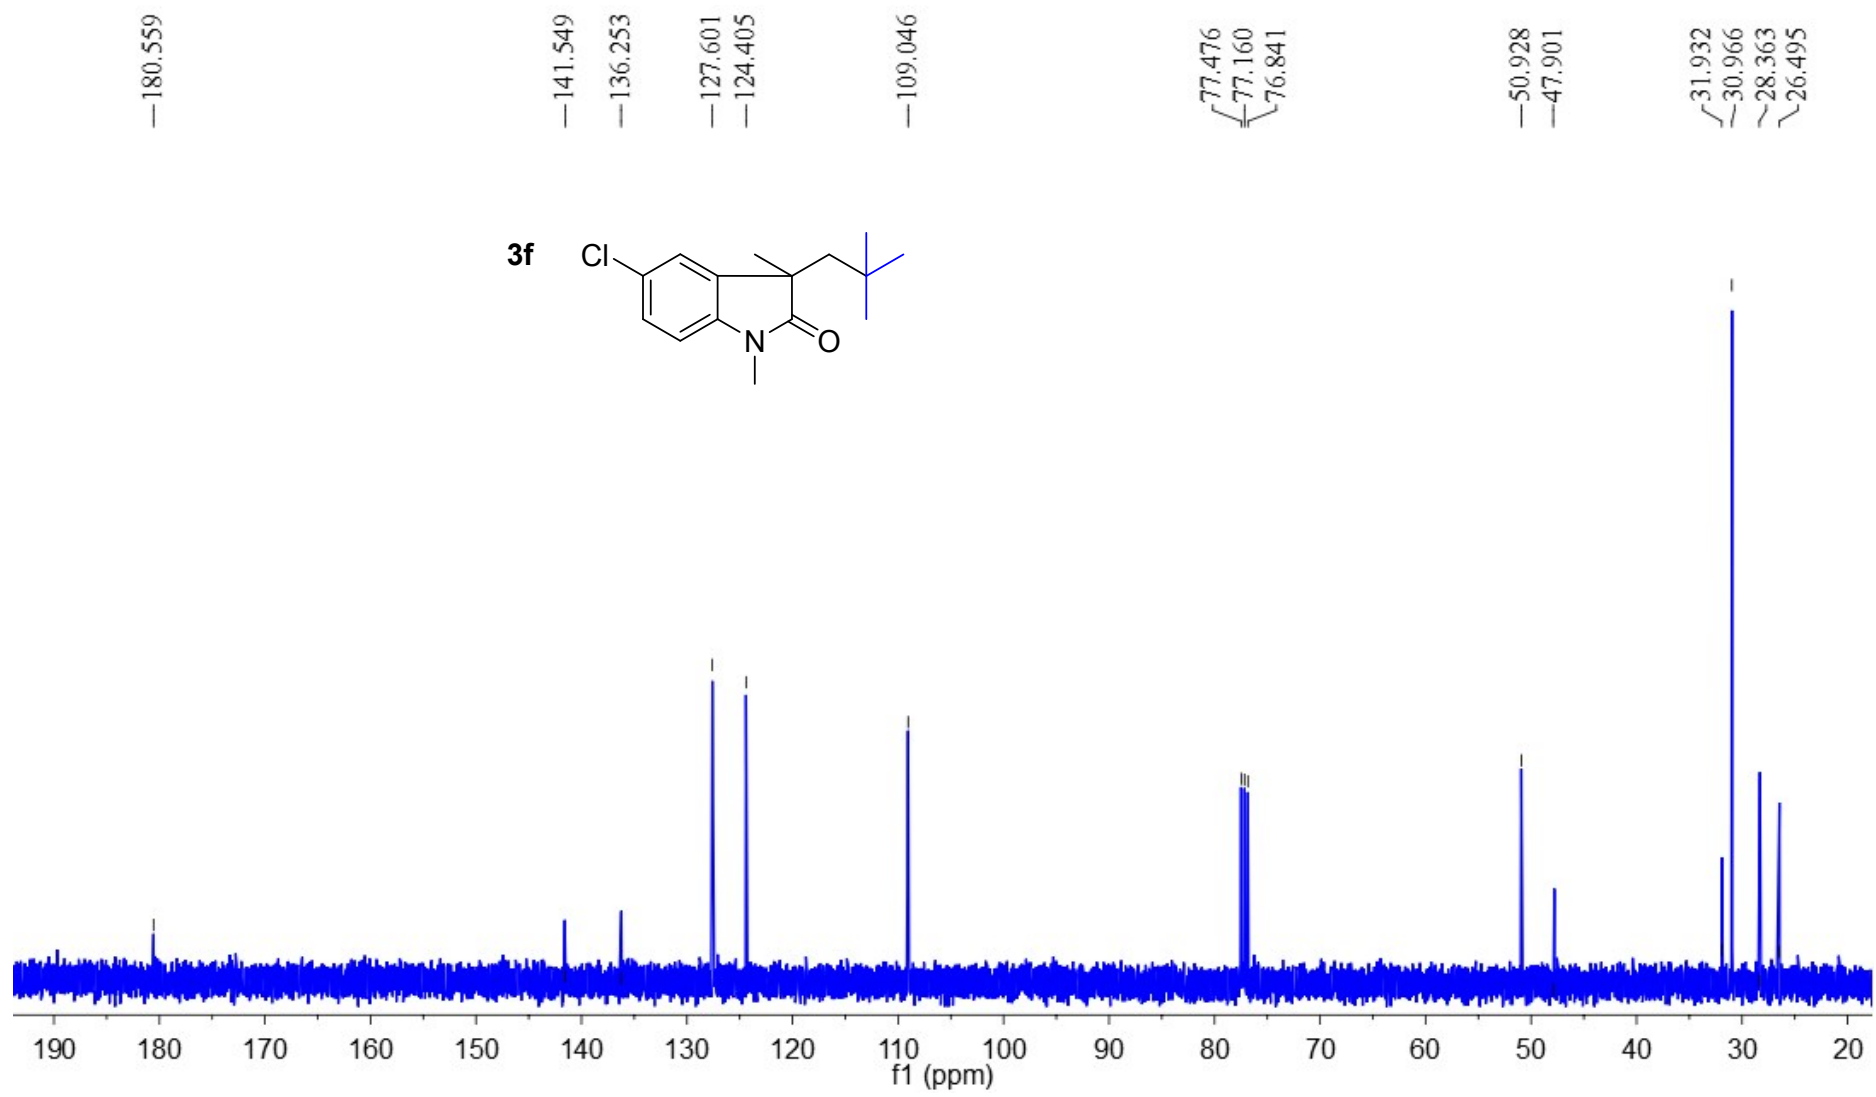

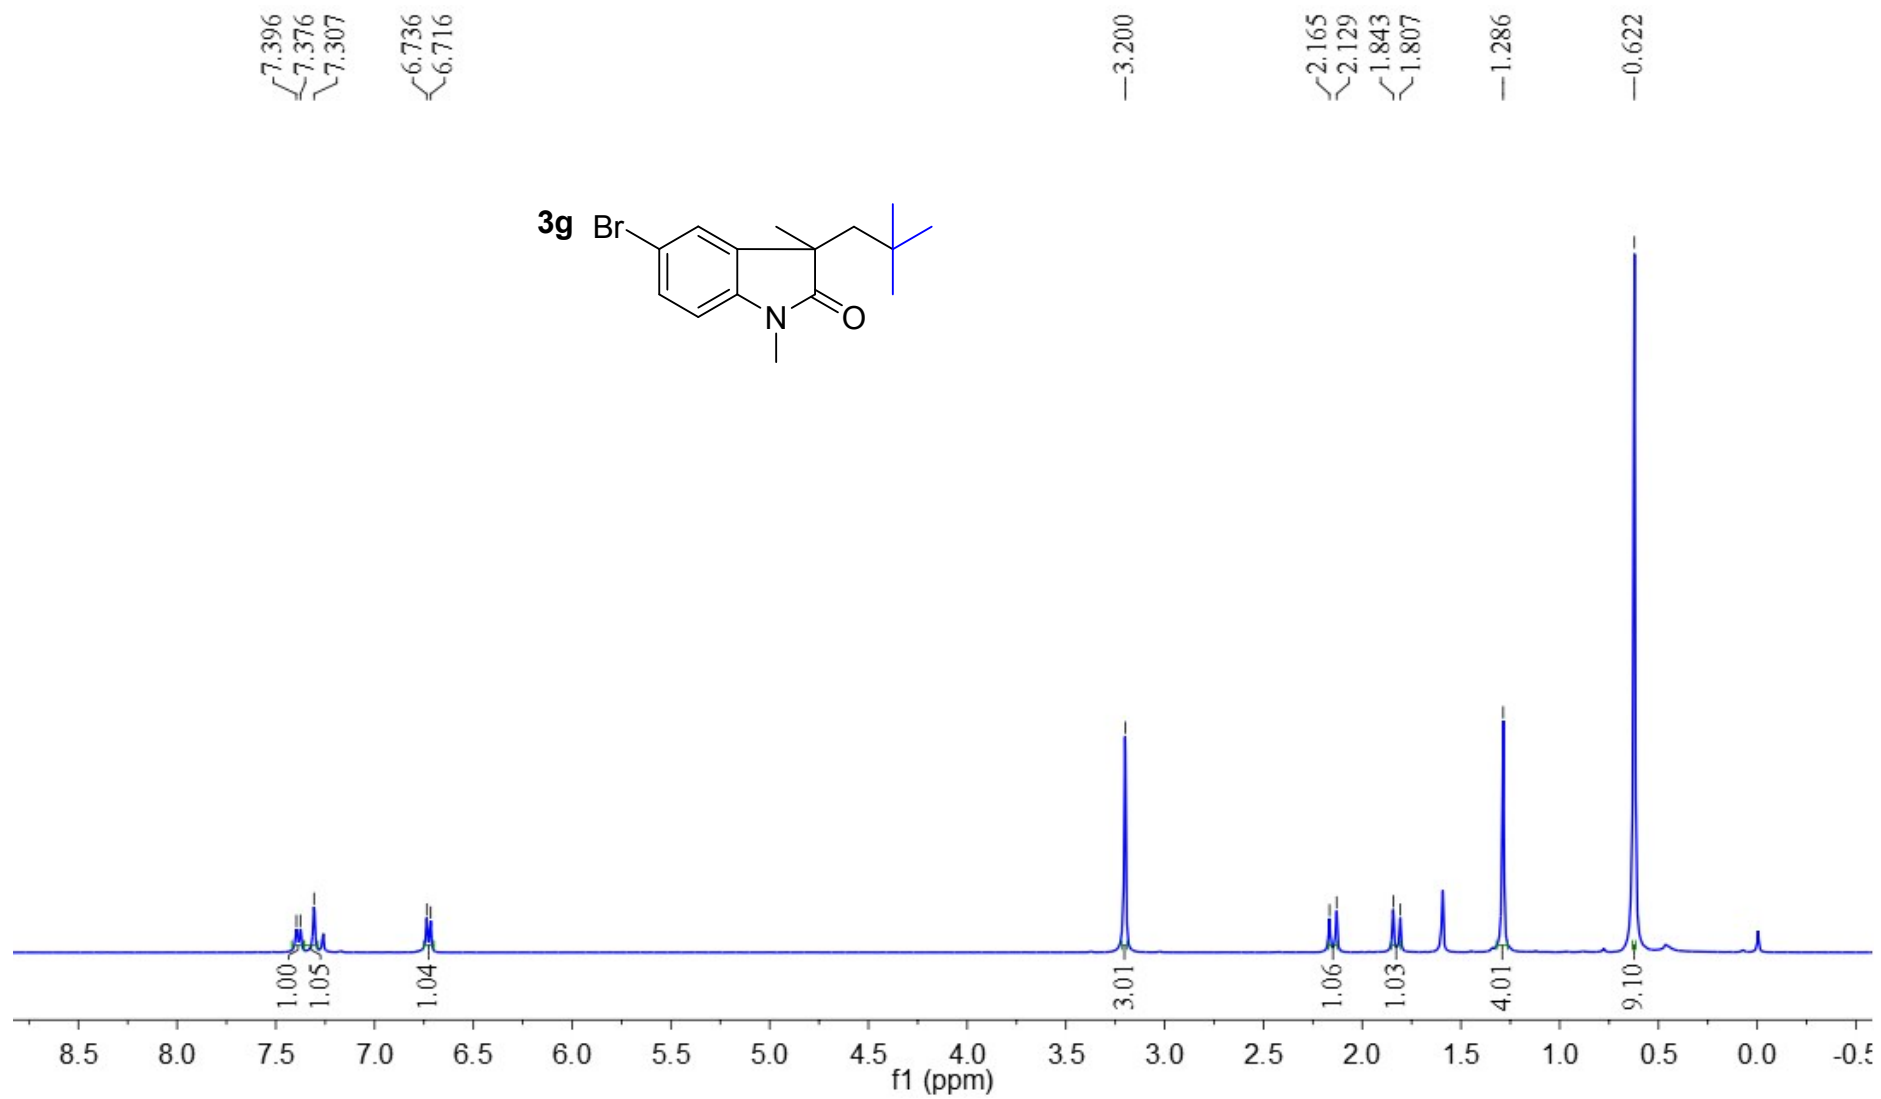

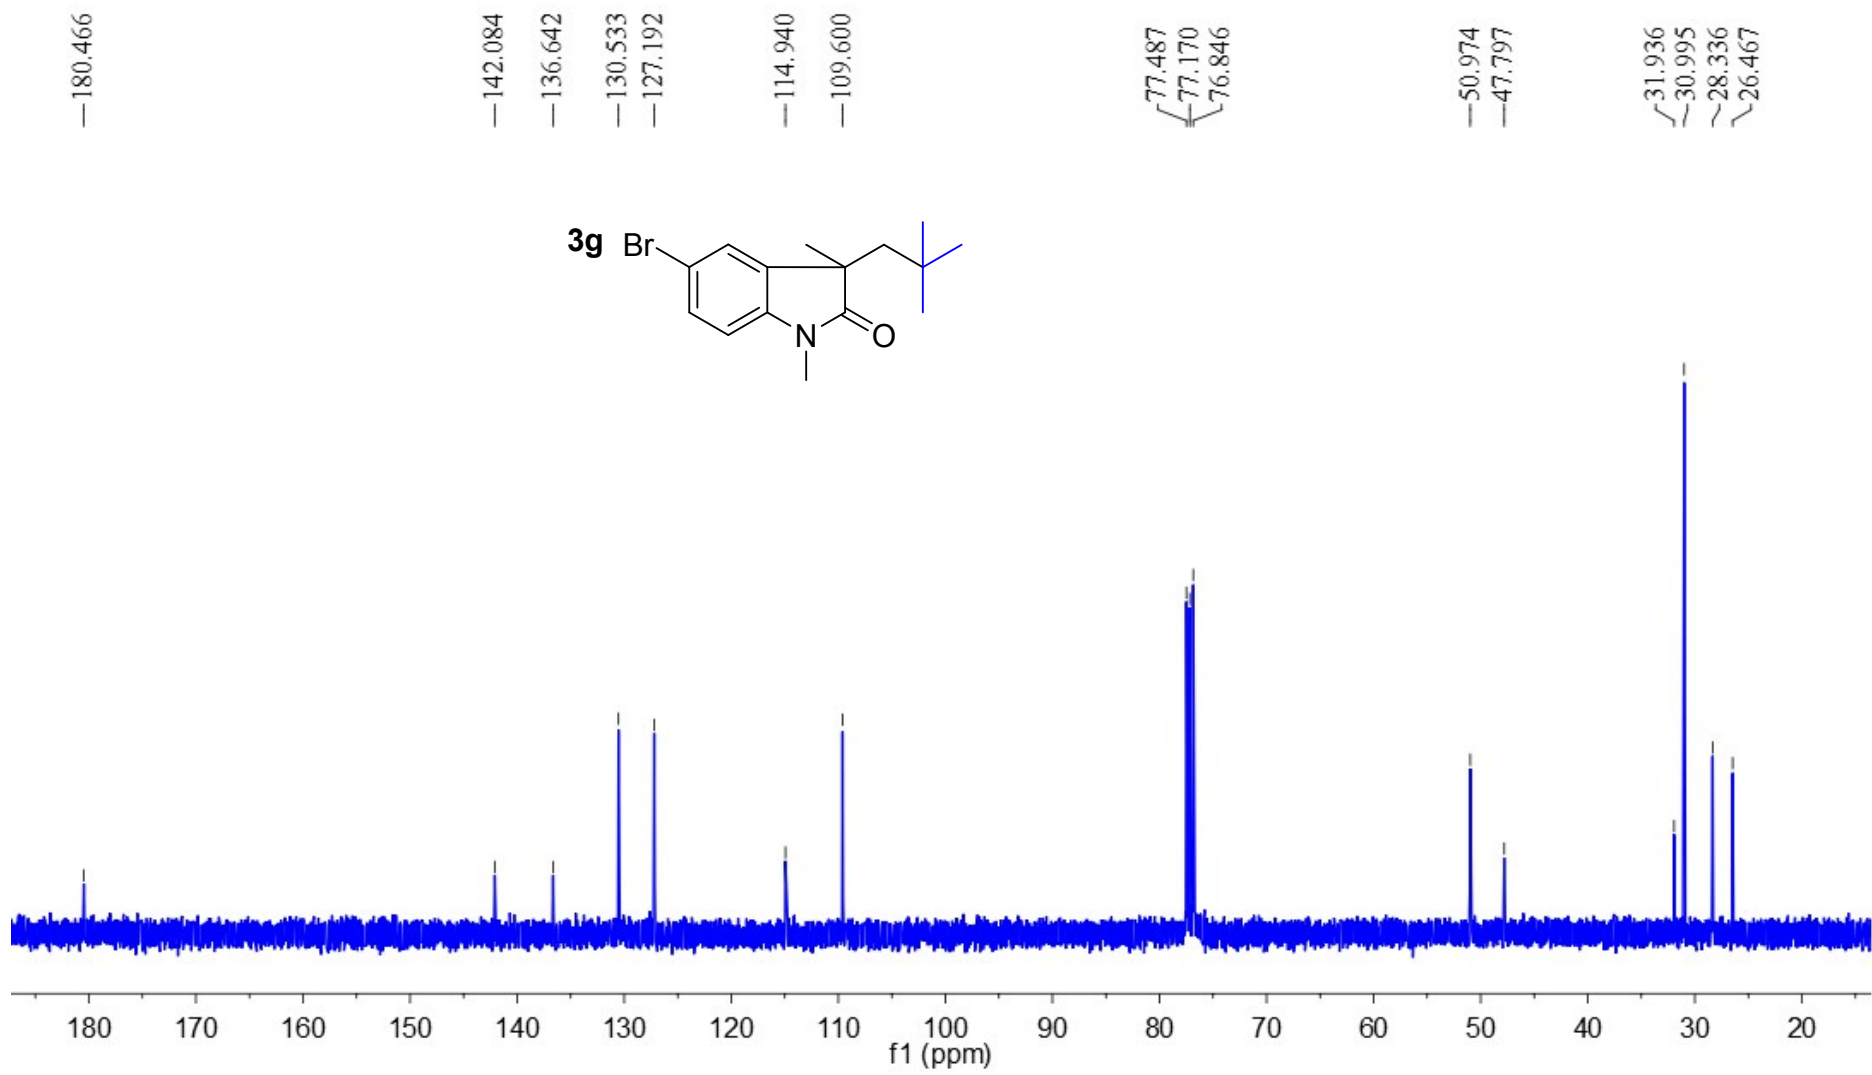

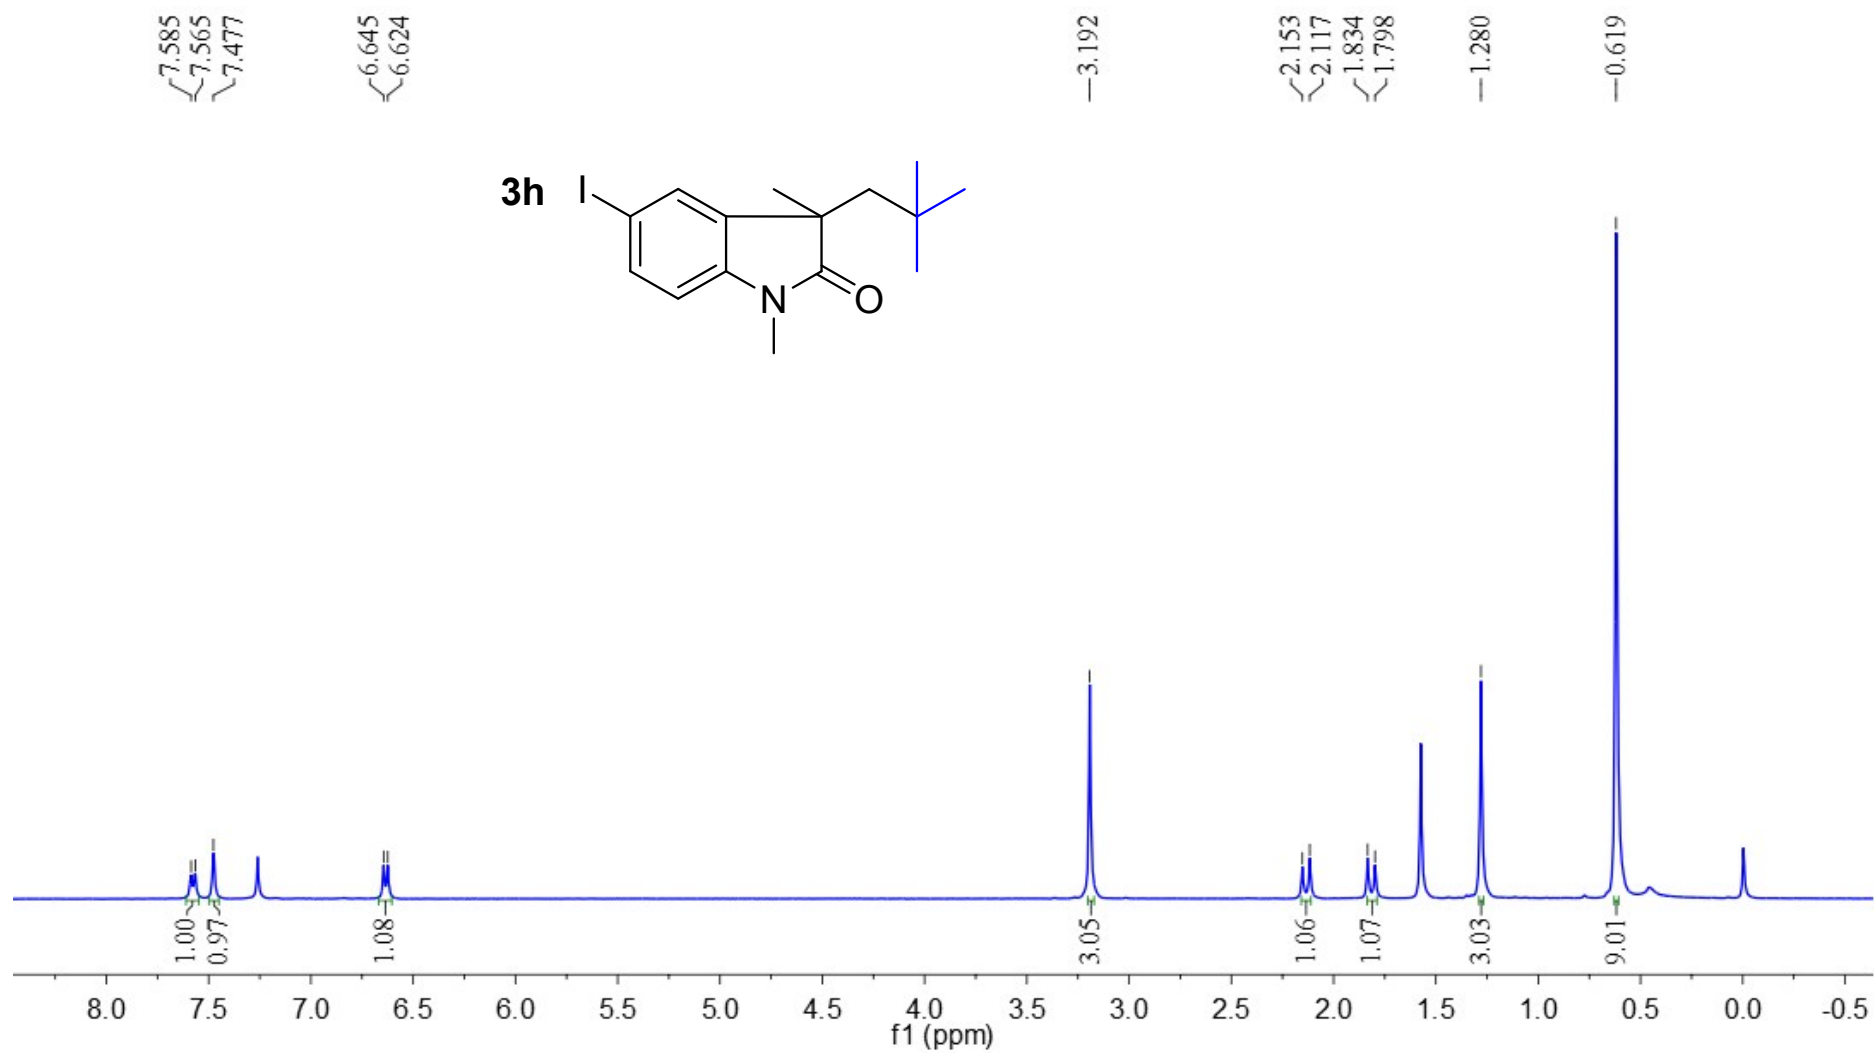

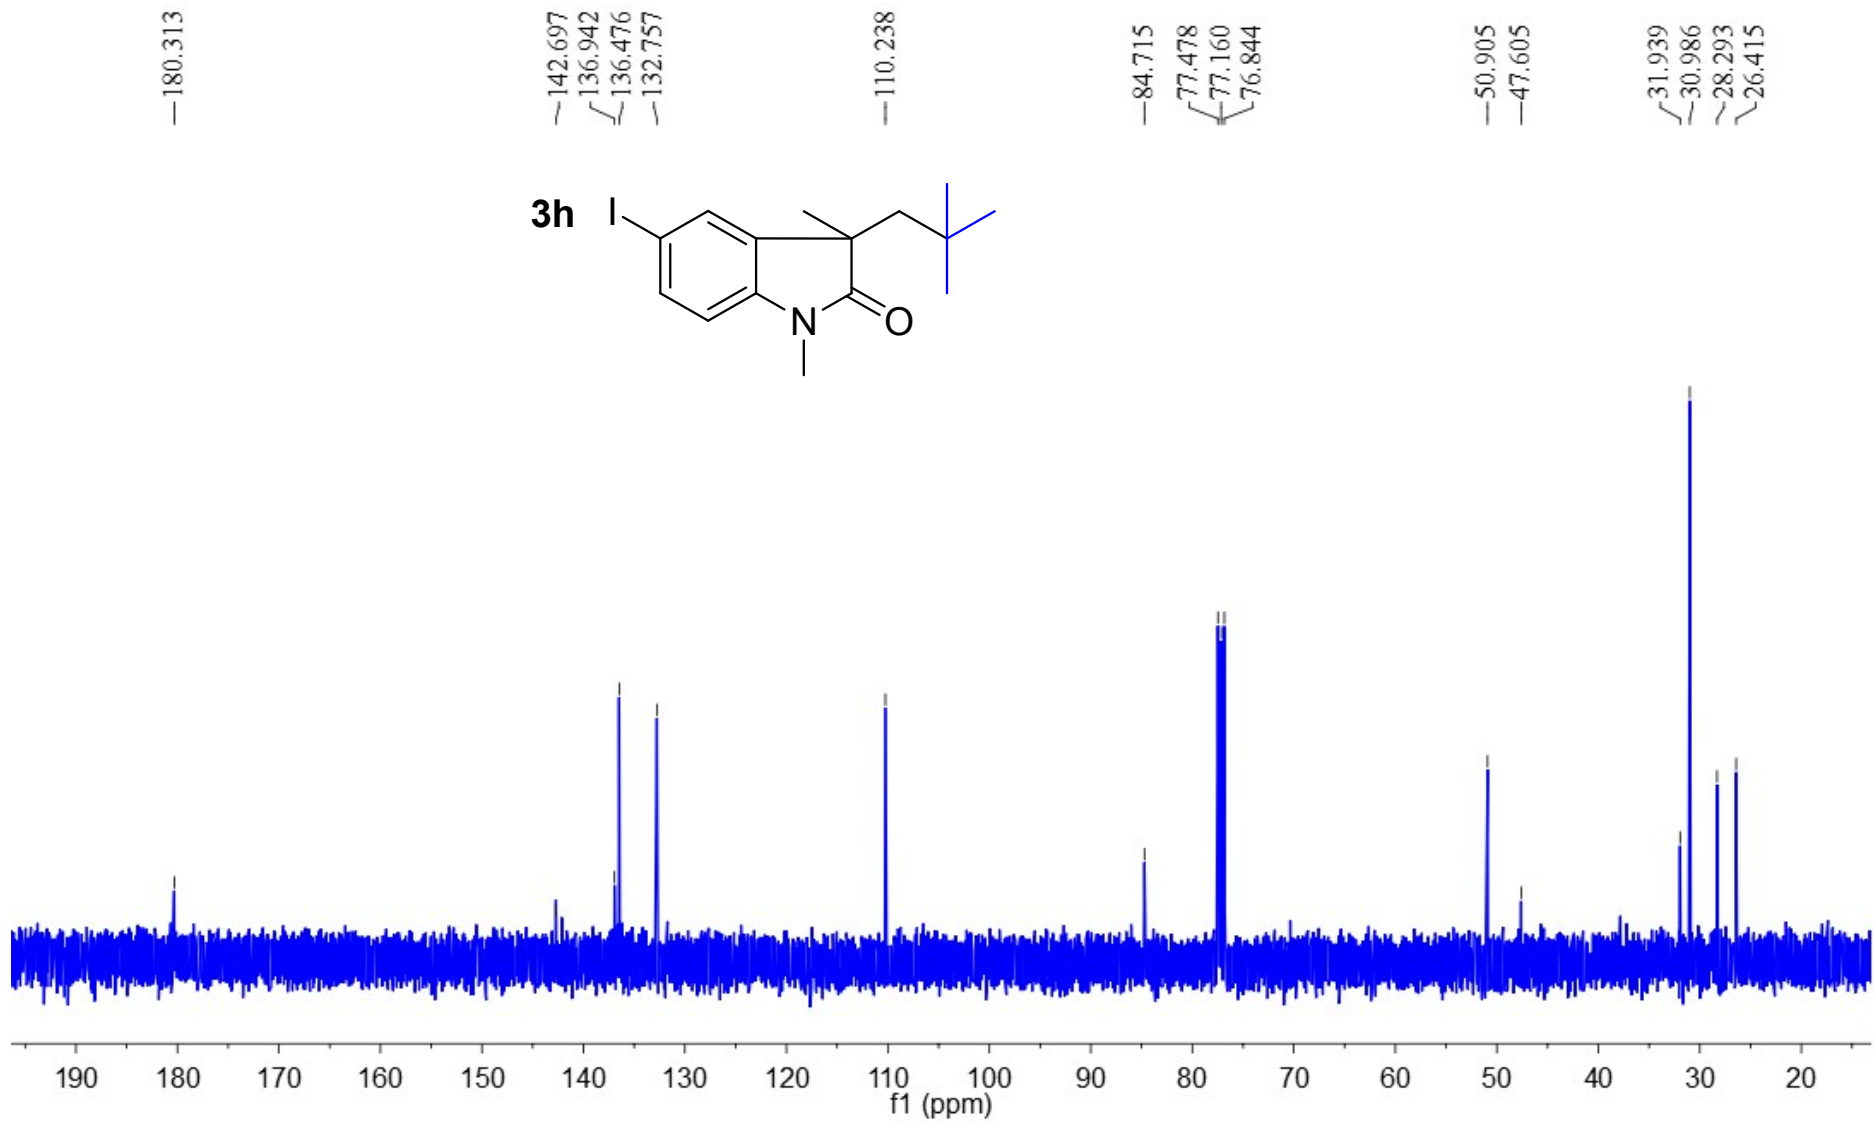

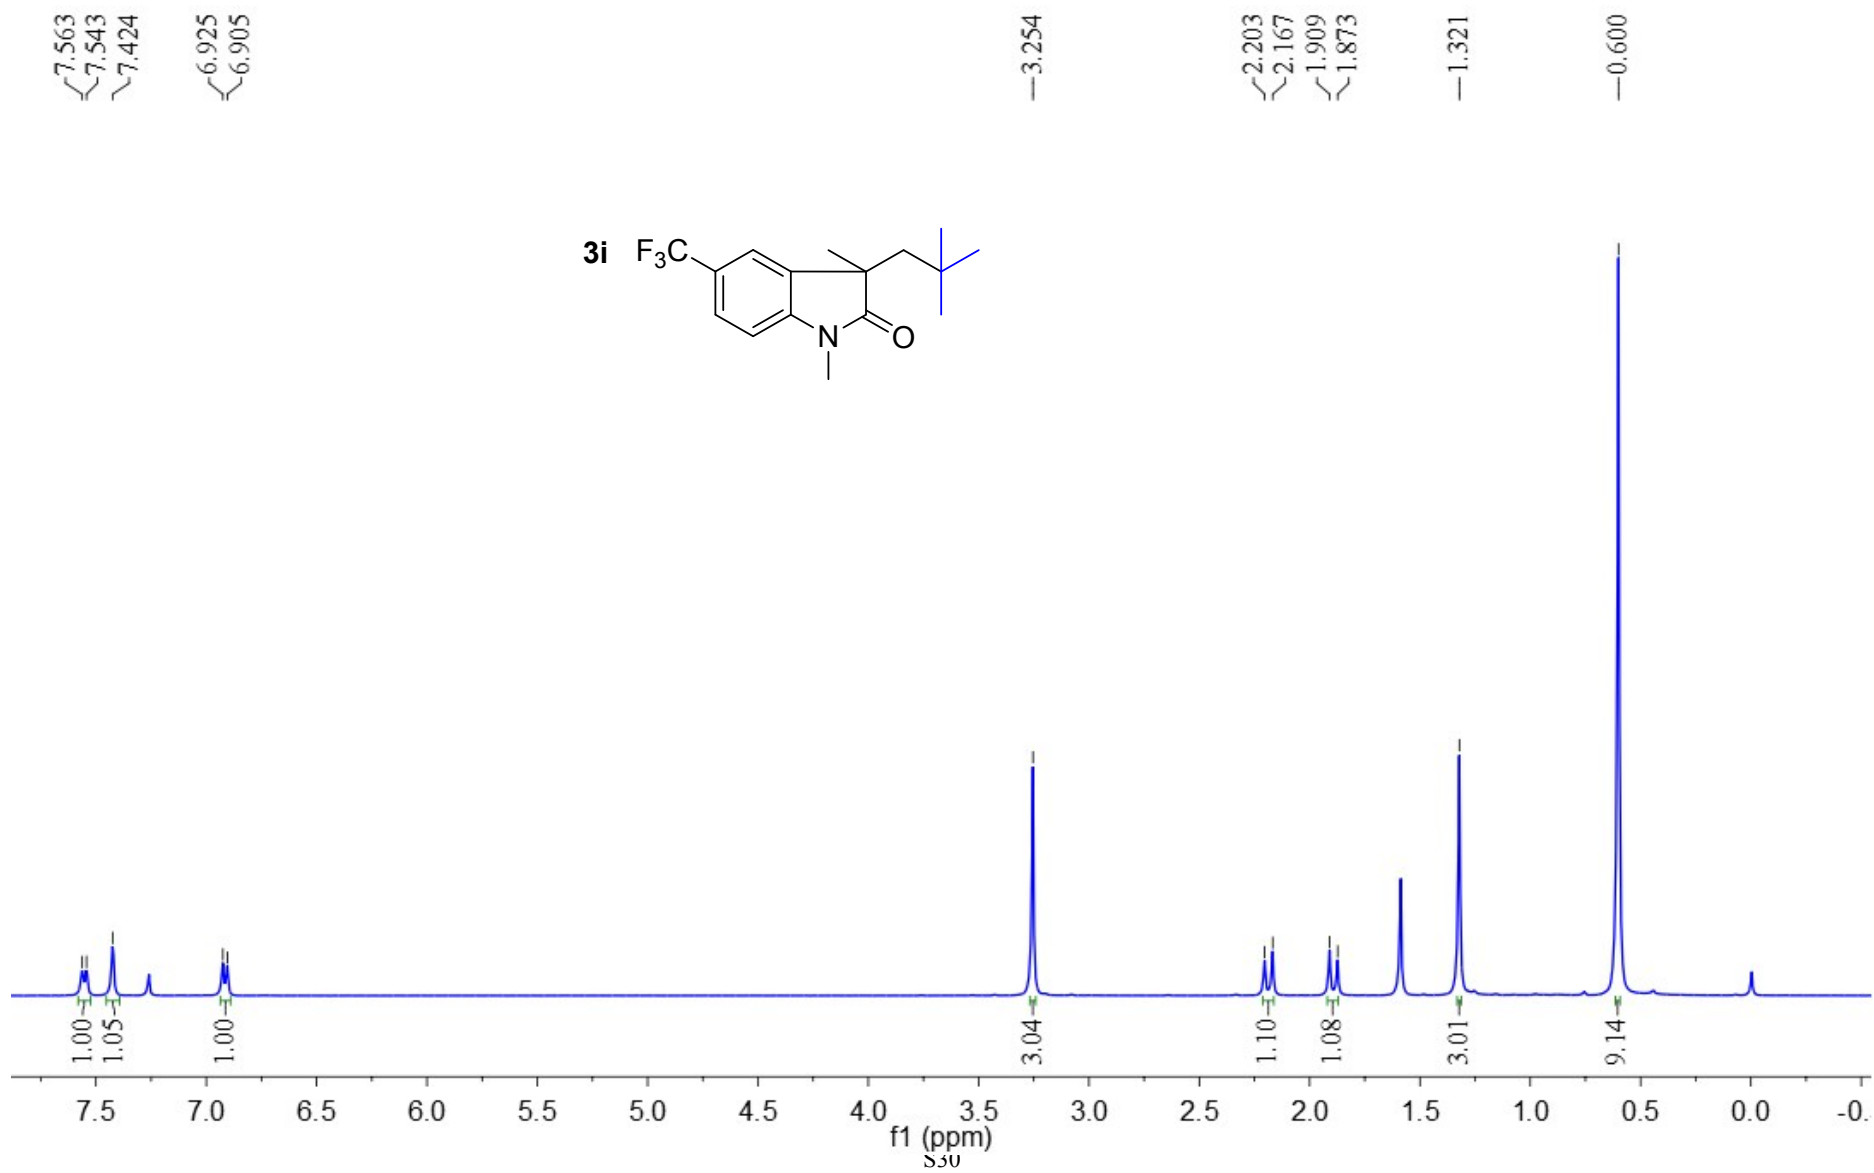

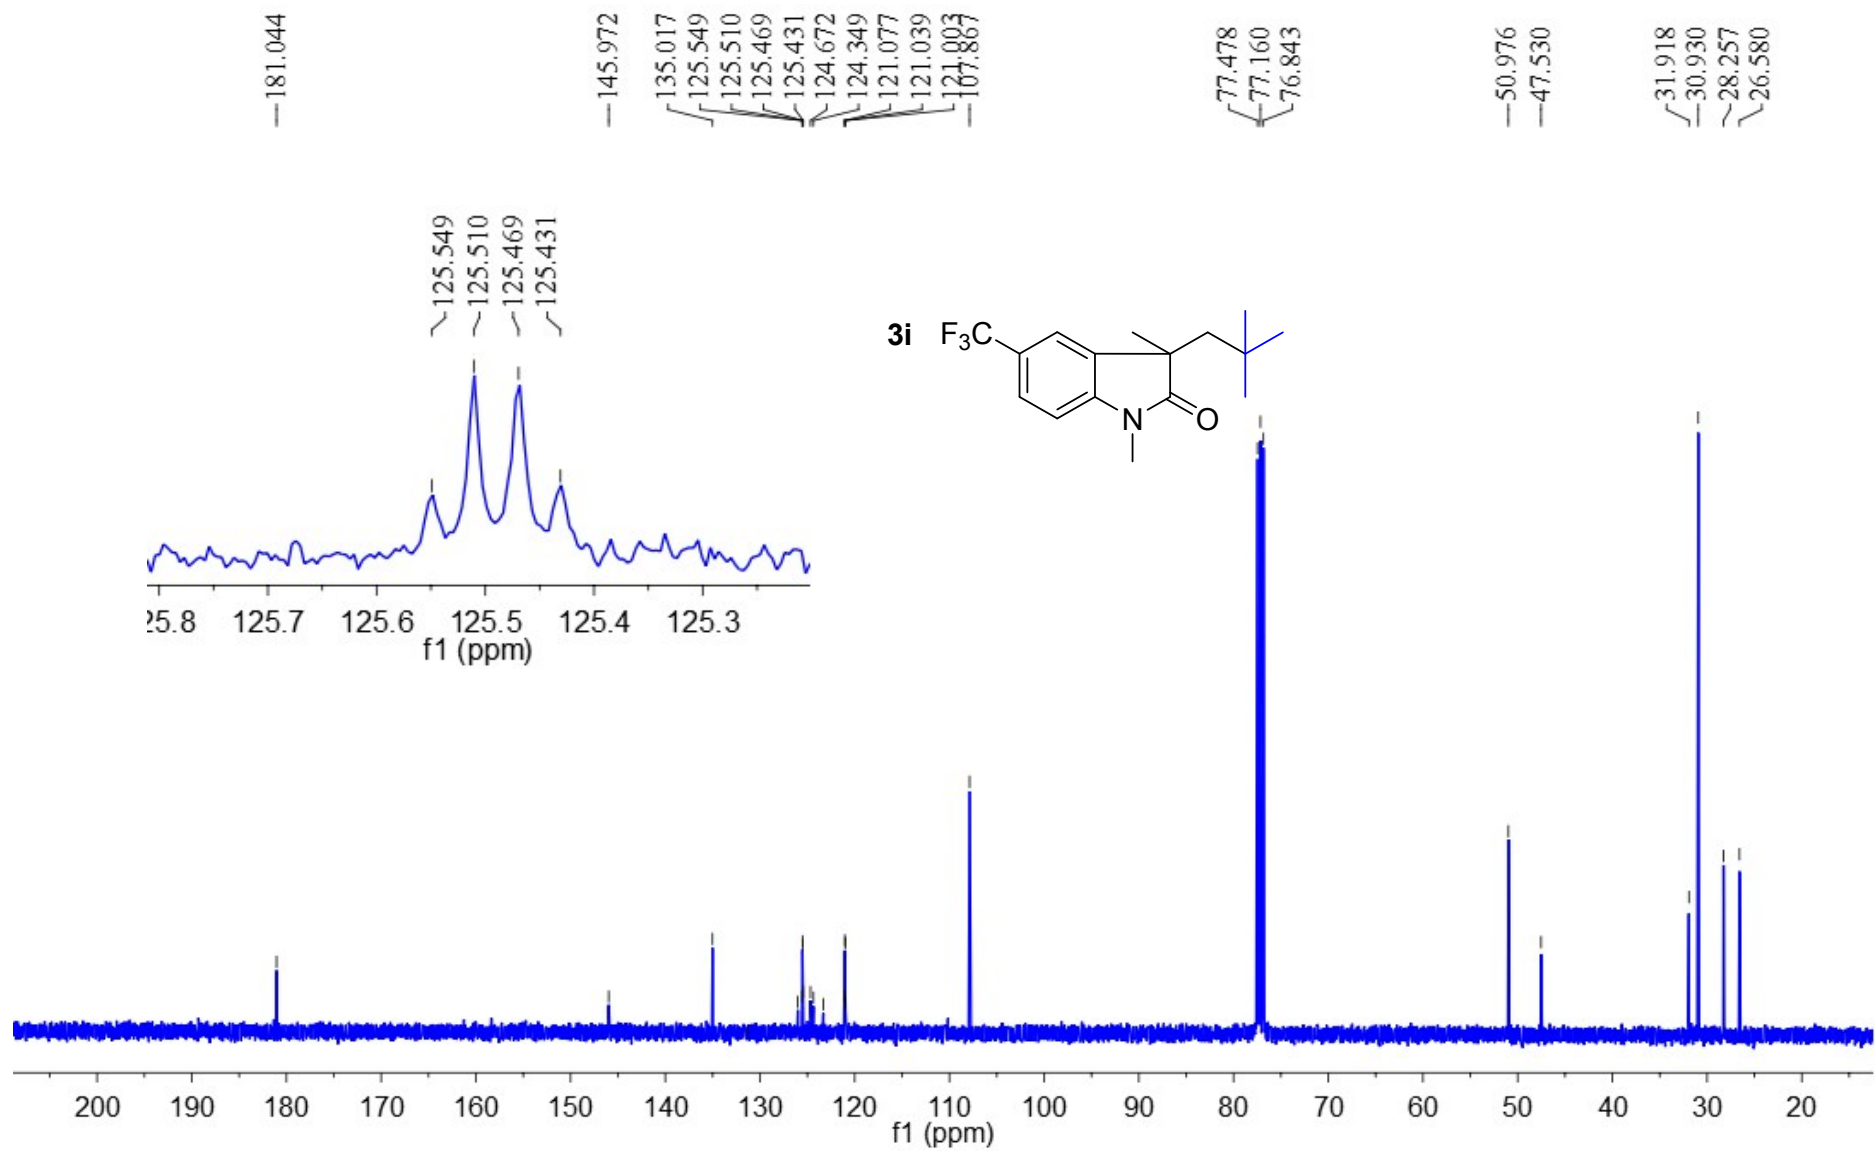



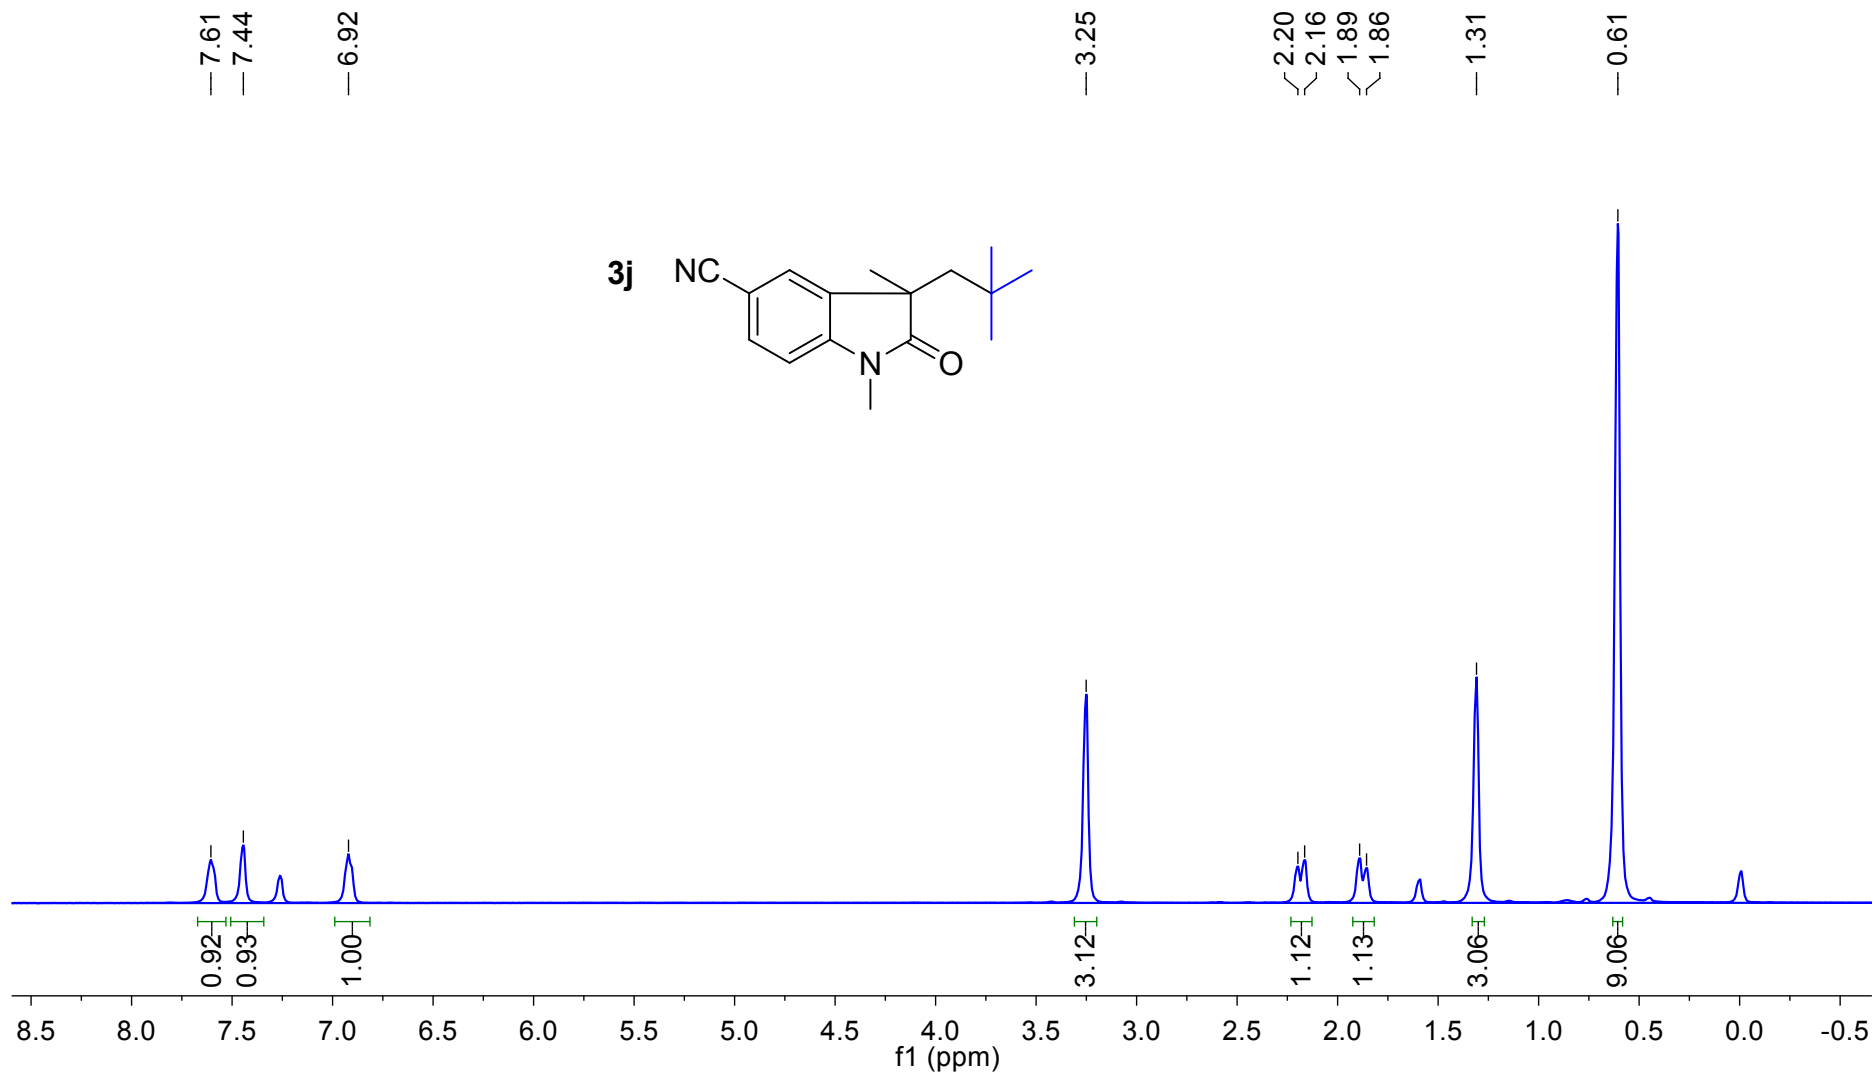

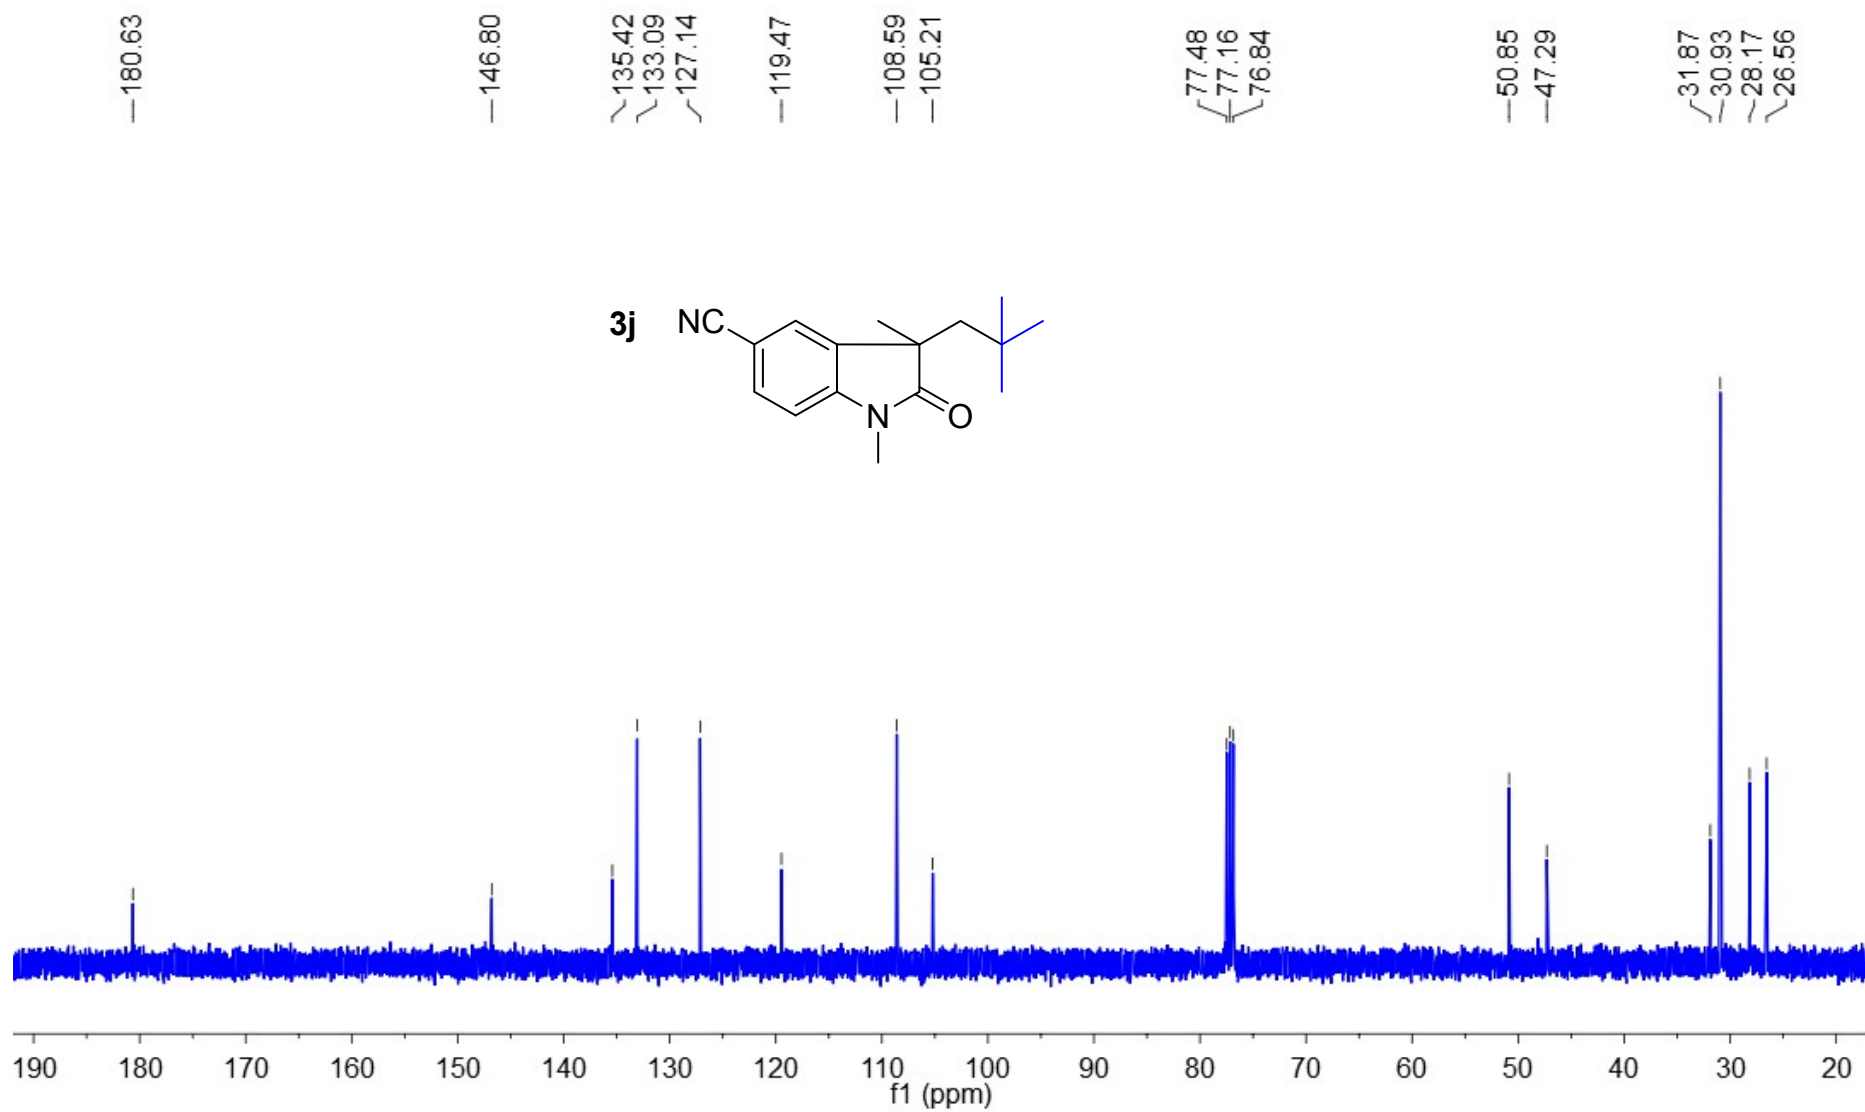

7.260  
7.034  
7.016  
6.987  
6.969  
6.924  
6.905  
6.887

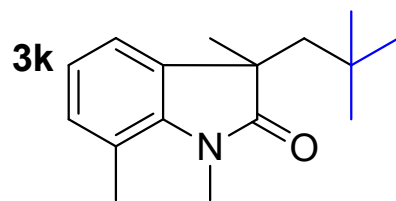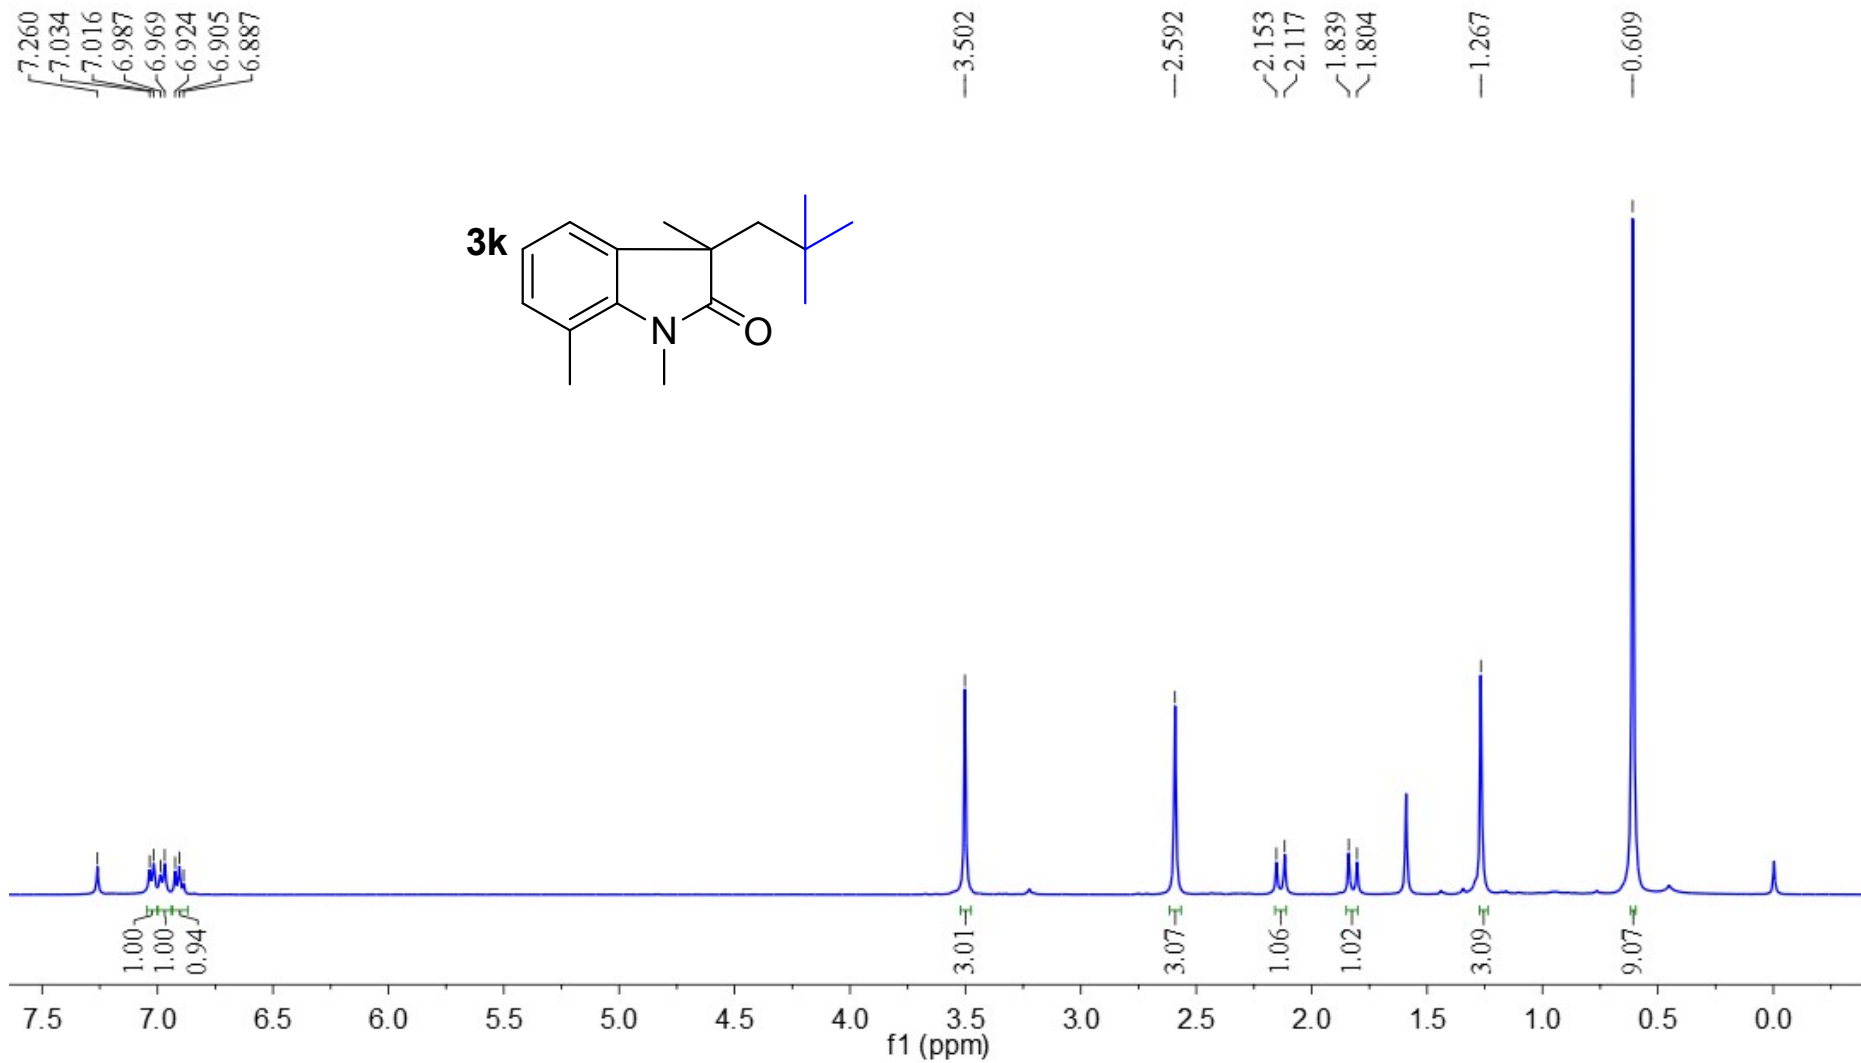

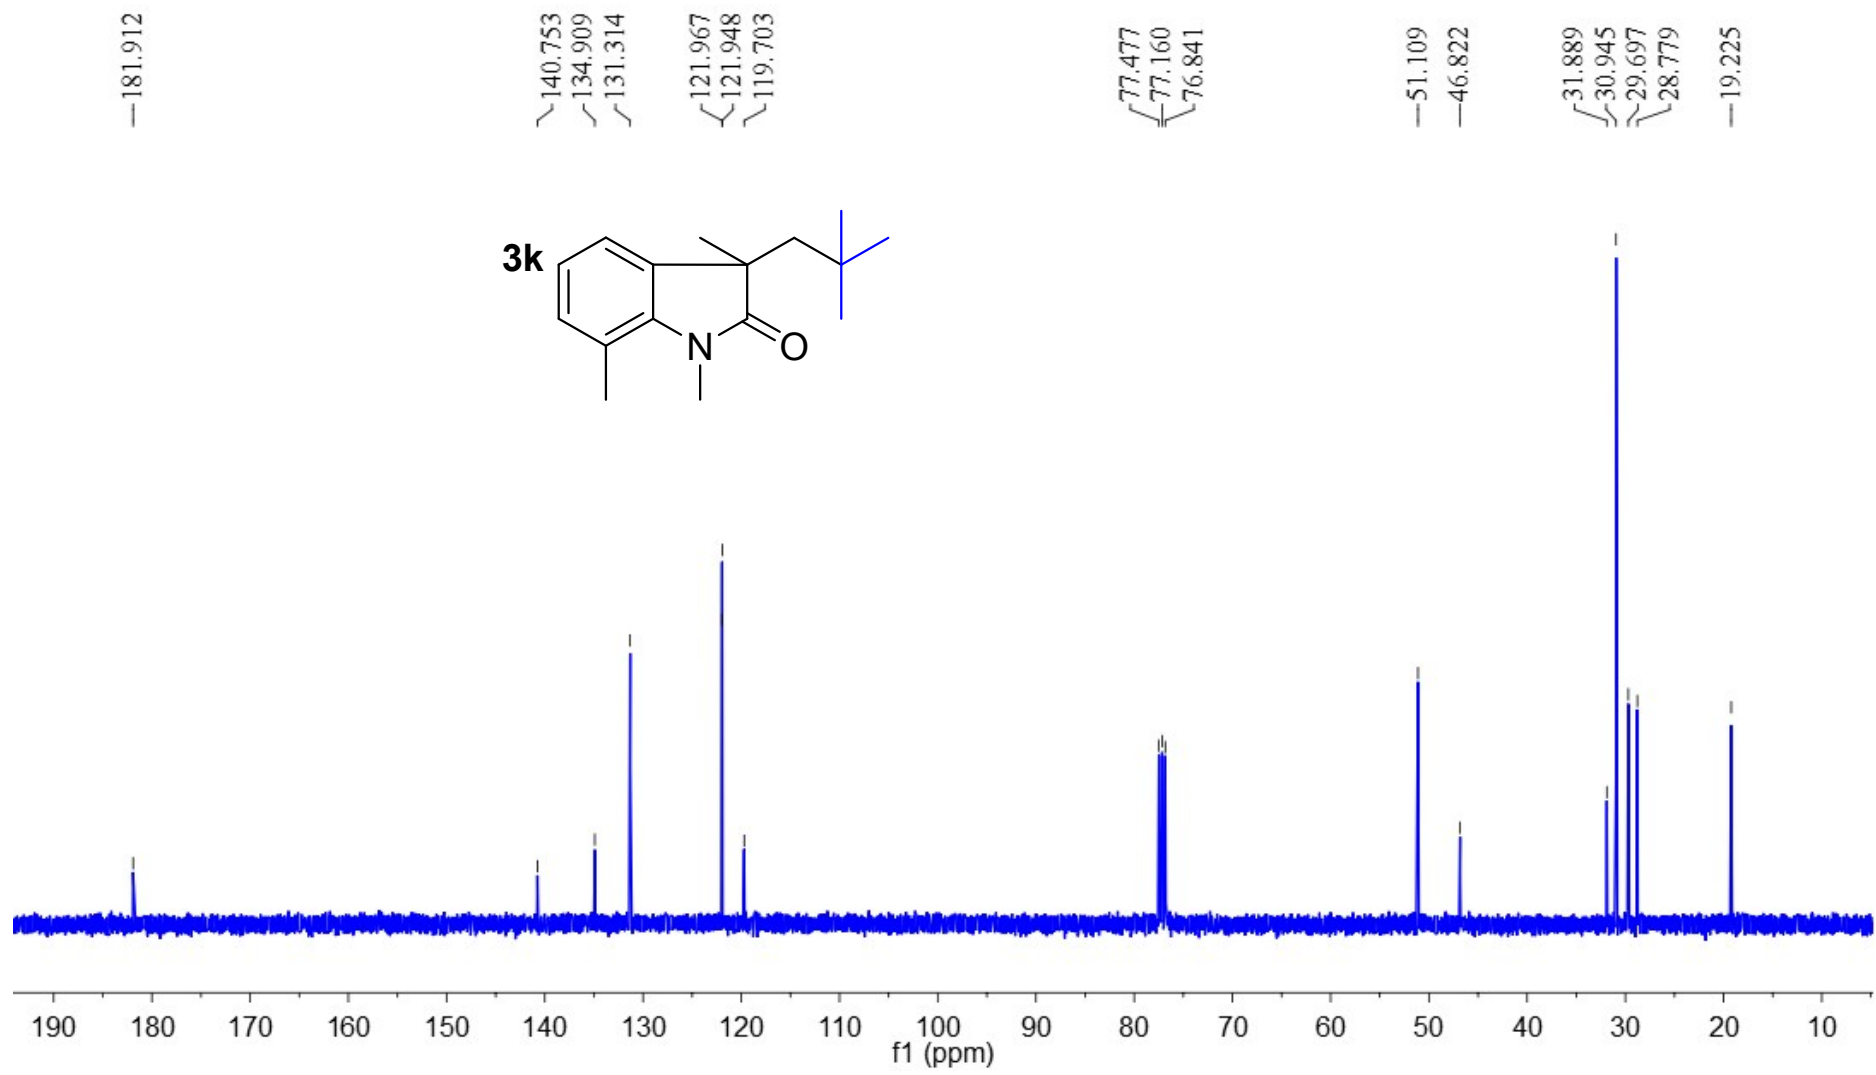

7.193  
7.174  
7.155  
7.077  
7.059  
6.853  
6.835  
6.809  
6.790  
6.709  
6.676

3.200

2.391  
2.149  
2.113  
2.085  
1.845  
1.809

1.361  
1.268

0.629  
0.610

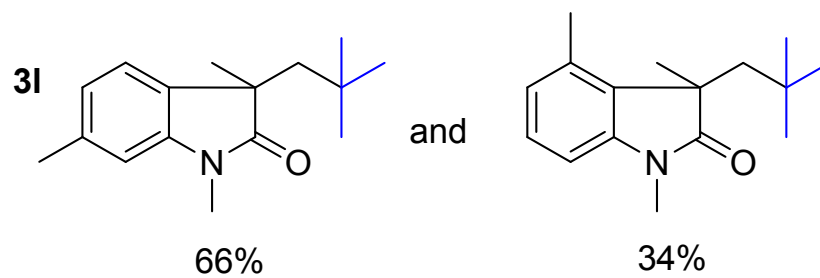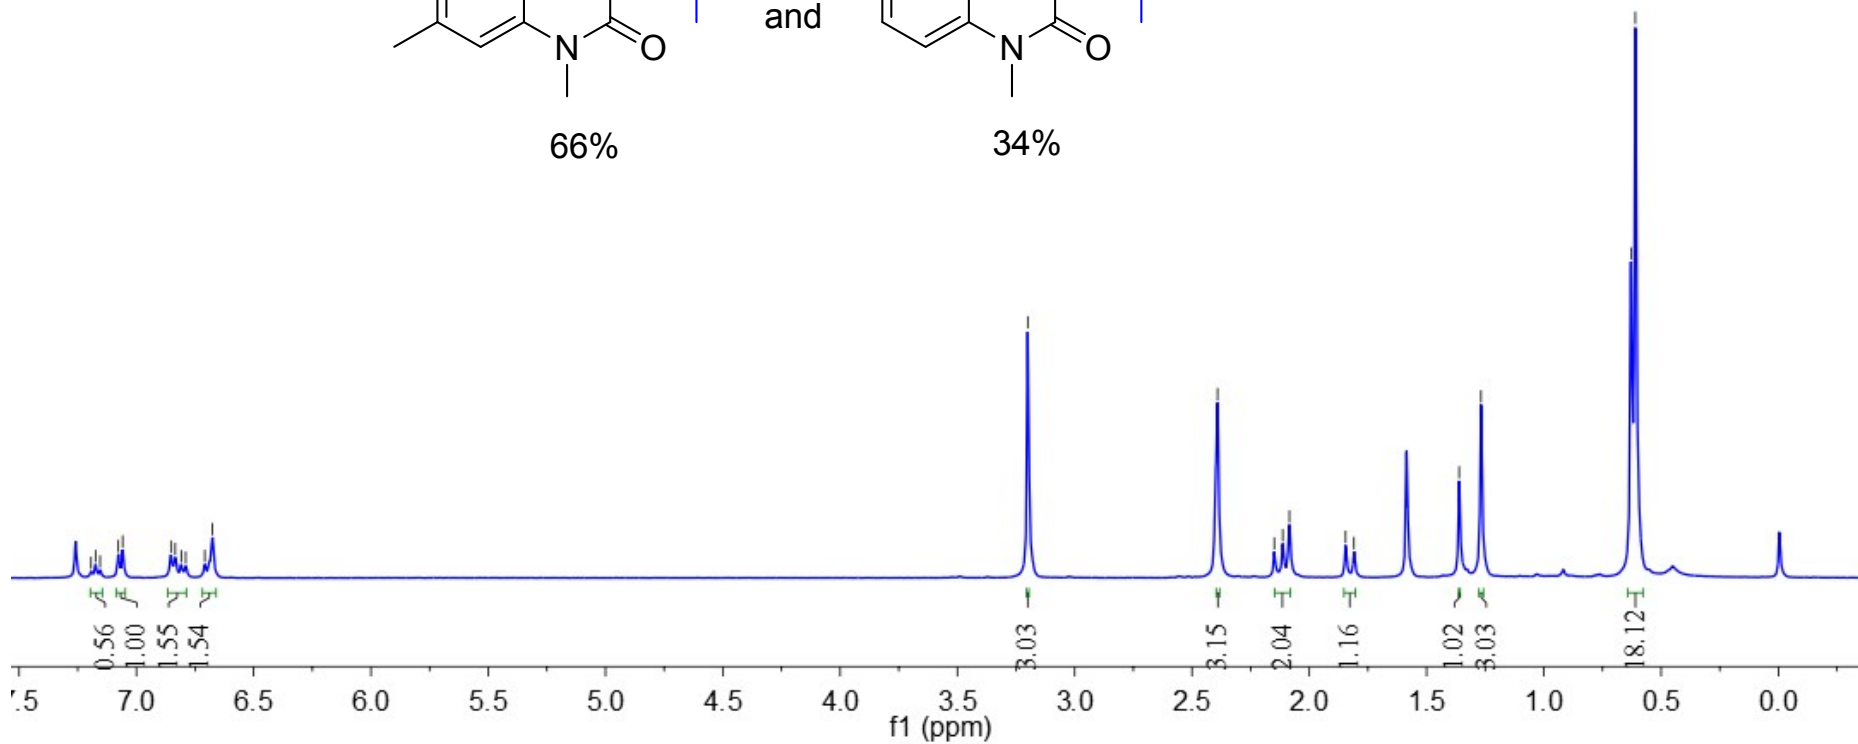

181.472  
181.144

143.175  
142.970  
137.630  
134.968  
131.263  
127.549  
125.004  
123.689  
122.596

109.061  
105.864

77.478  
77.160  
76.841

50.830  
49.179  
48.274  
47.265

31.820  
30.907  
30.087  
28.461  
26.373  
26.267  
25.344  
21.874  
18.830

3I

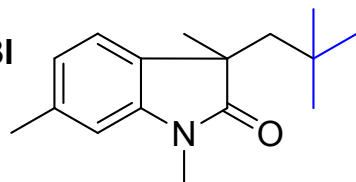

66%

and

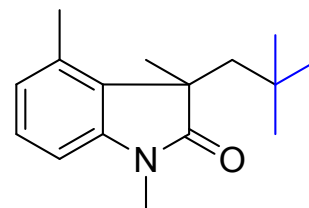

34%

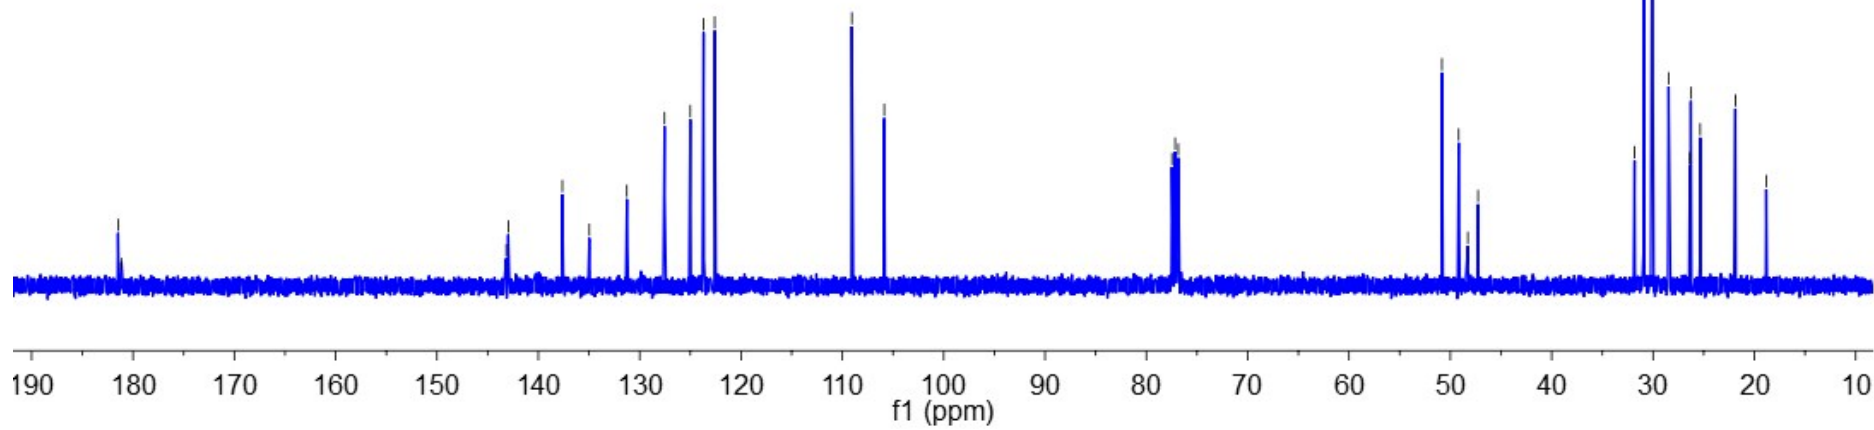

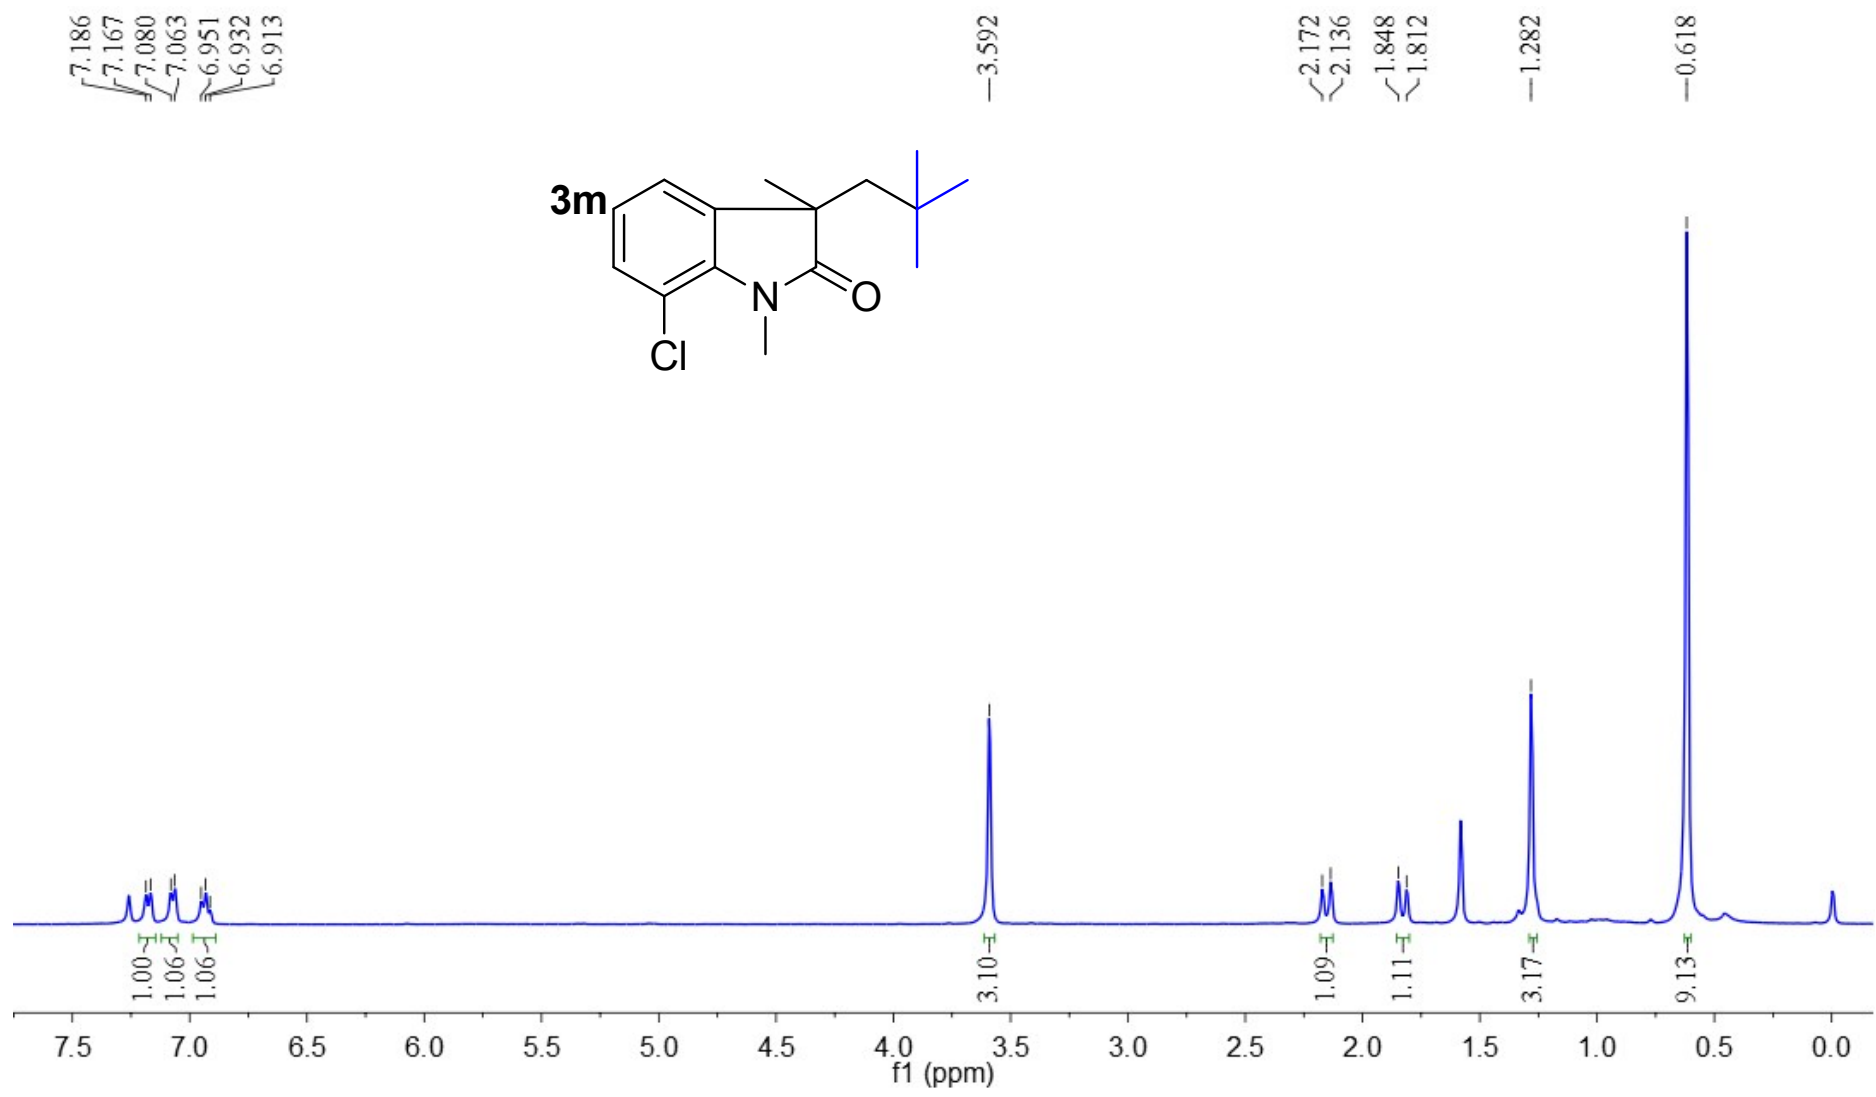

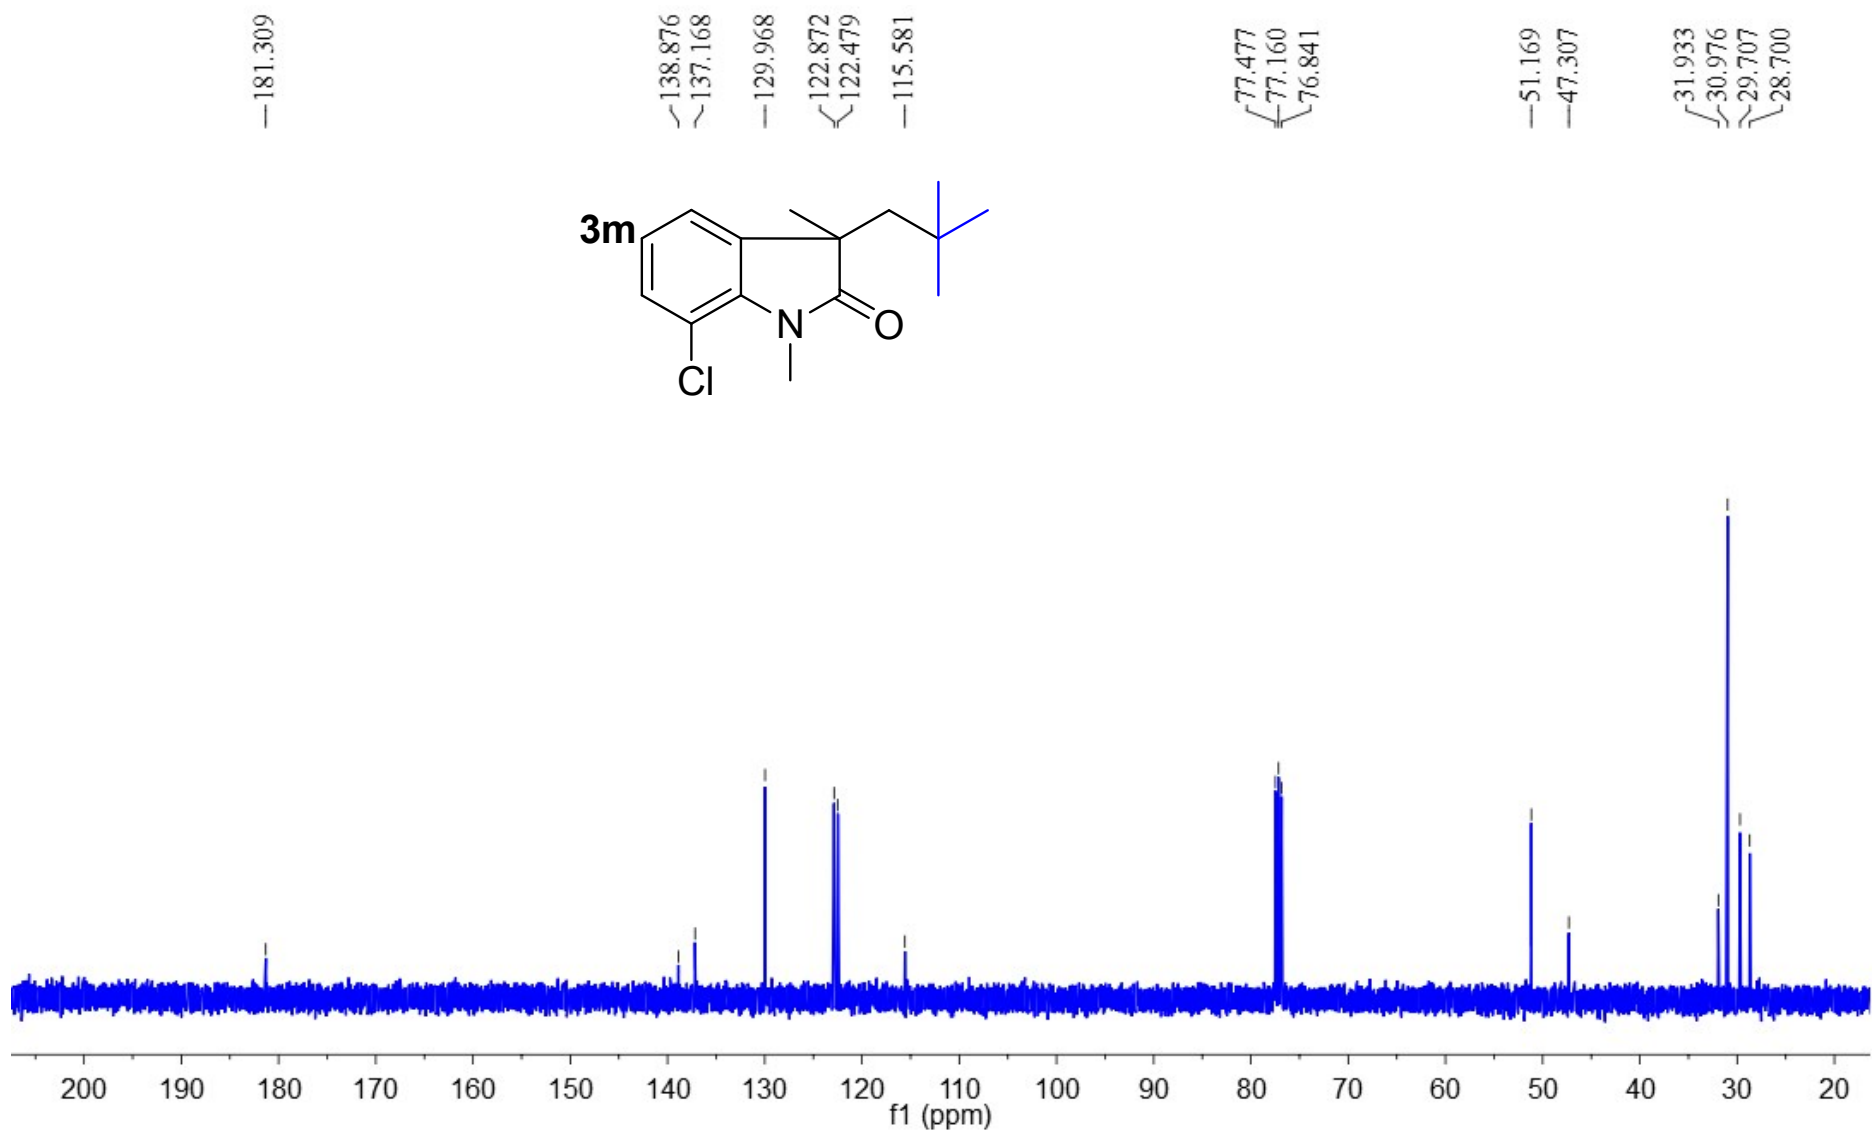



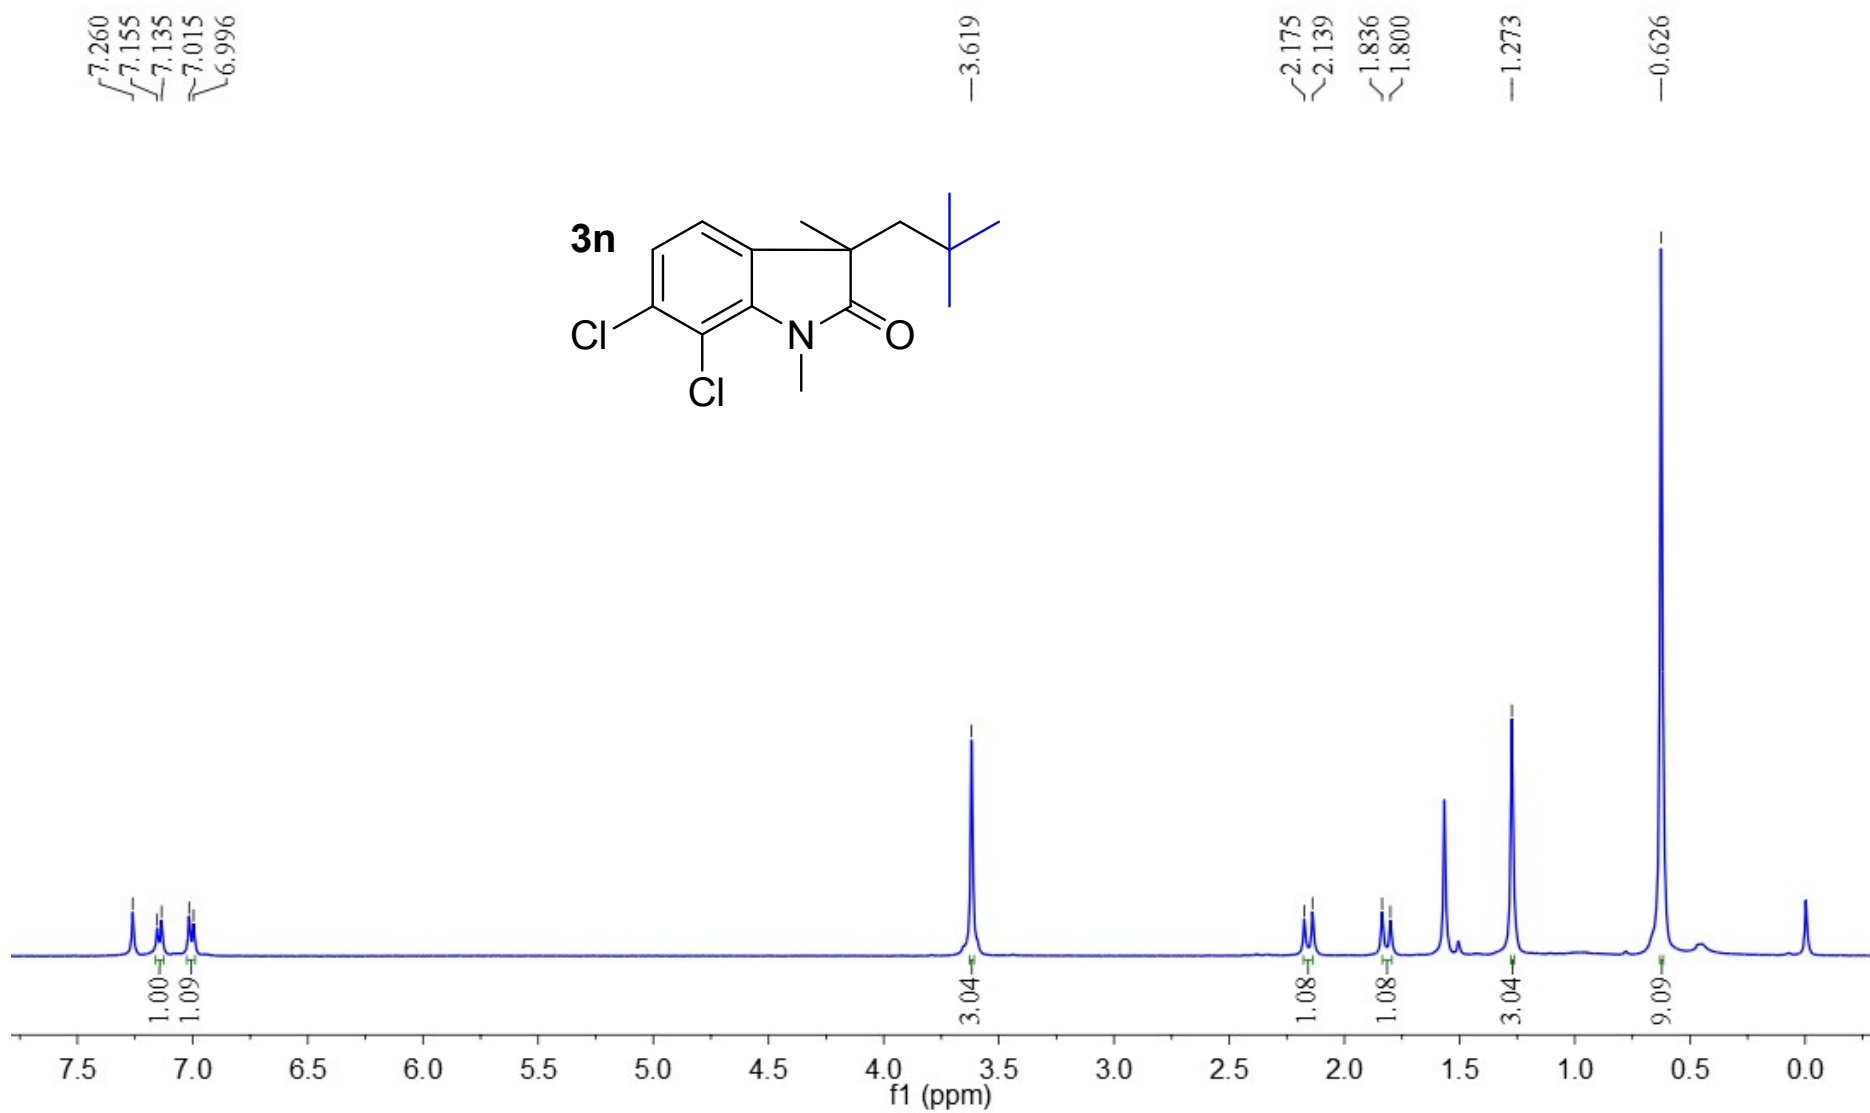

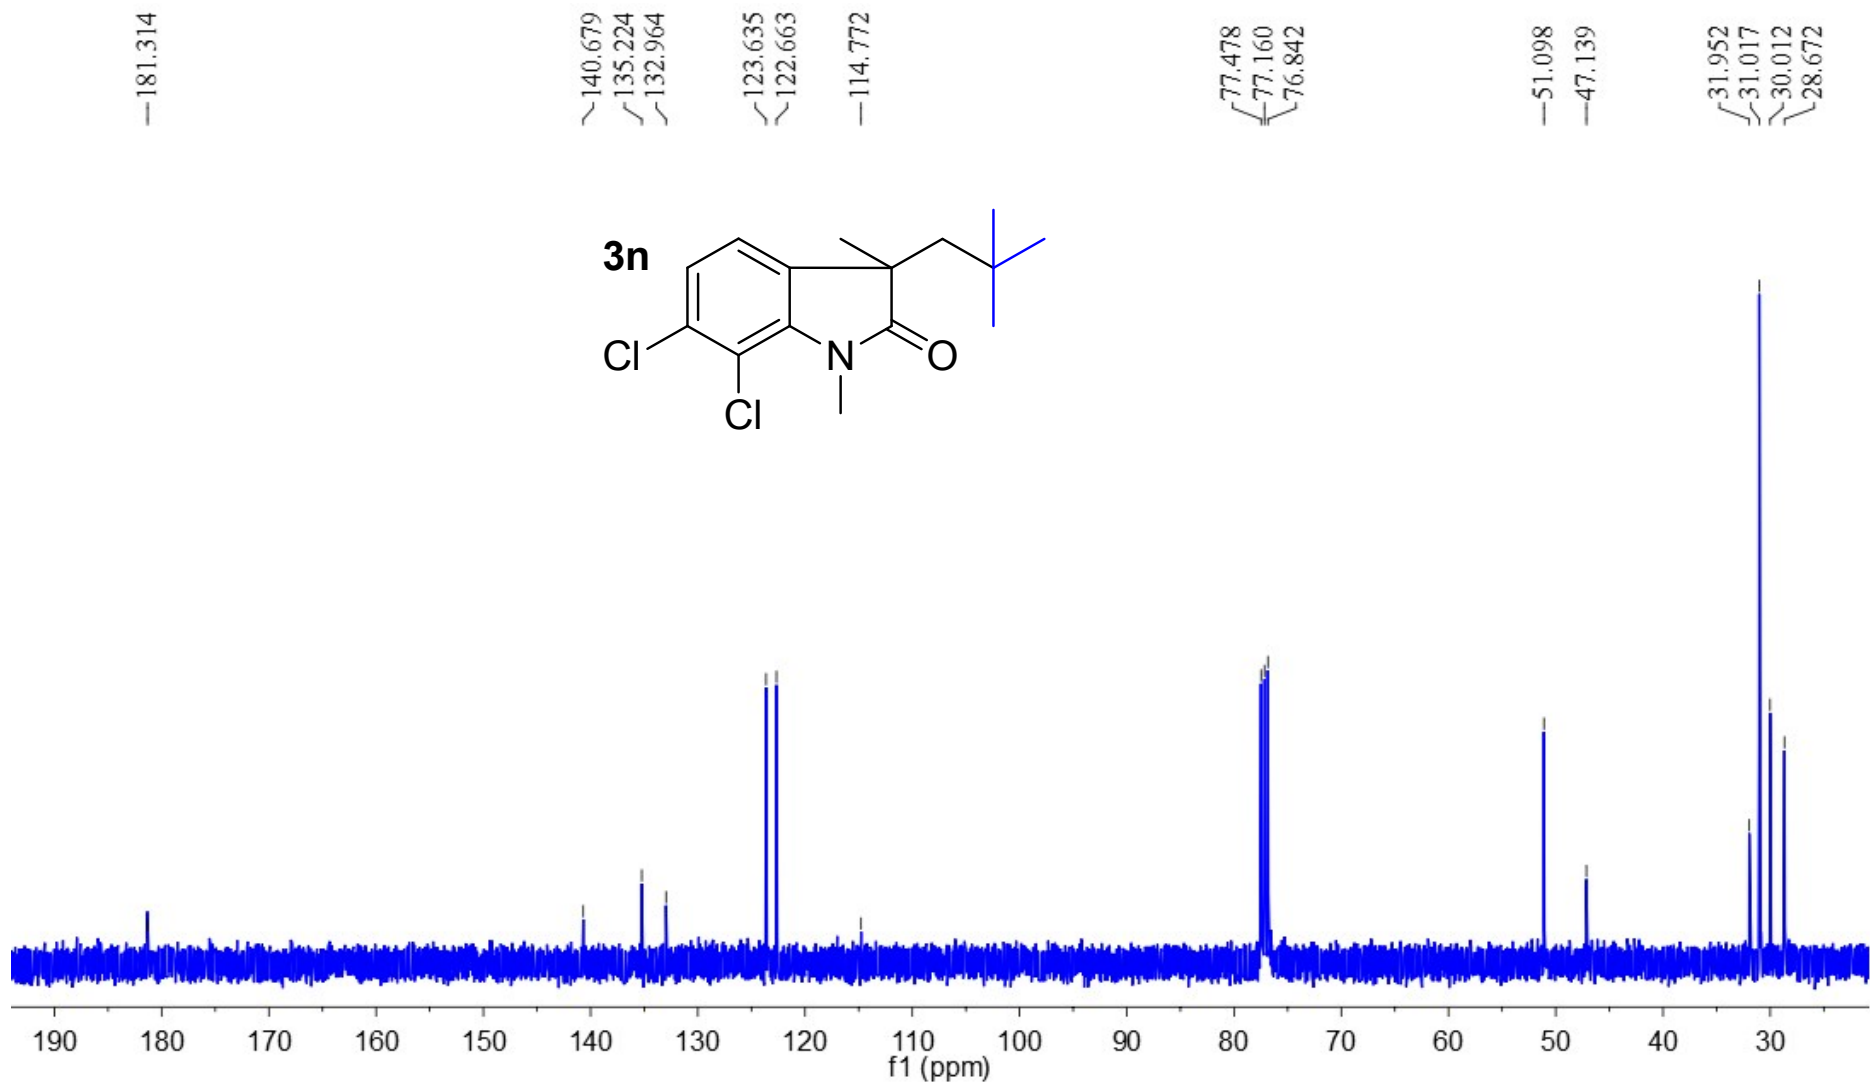

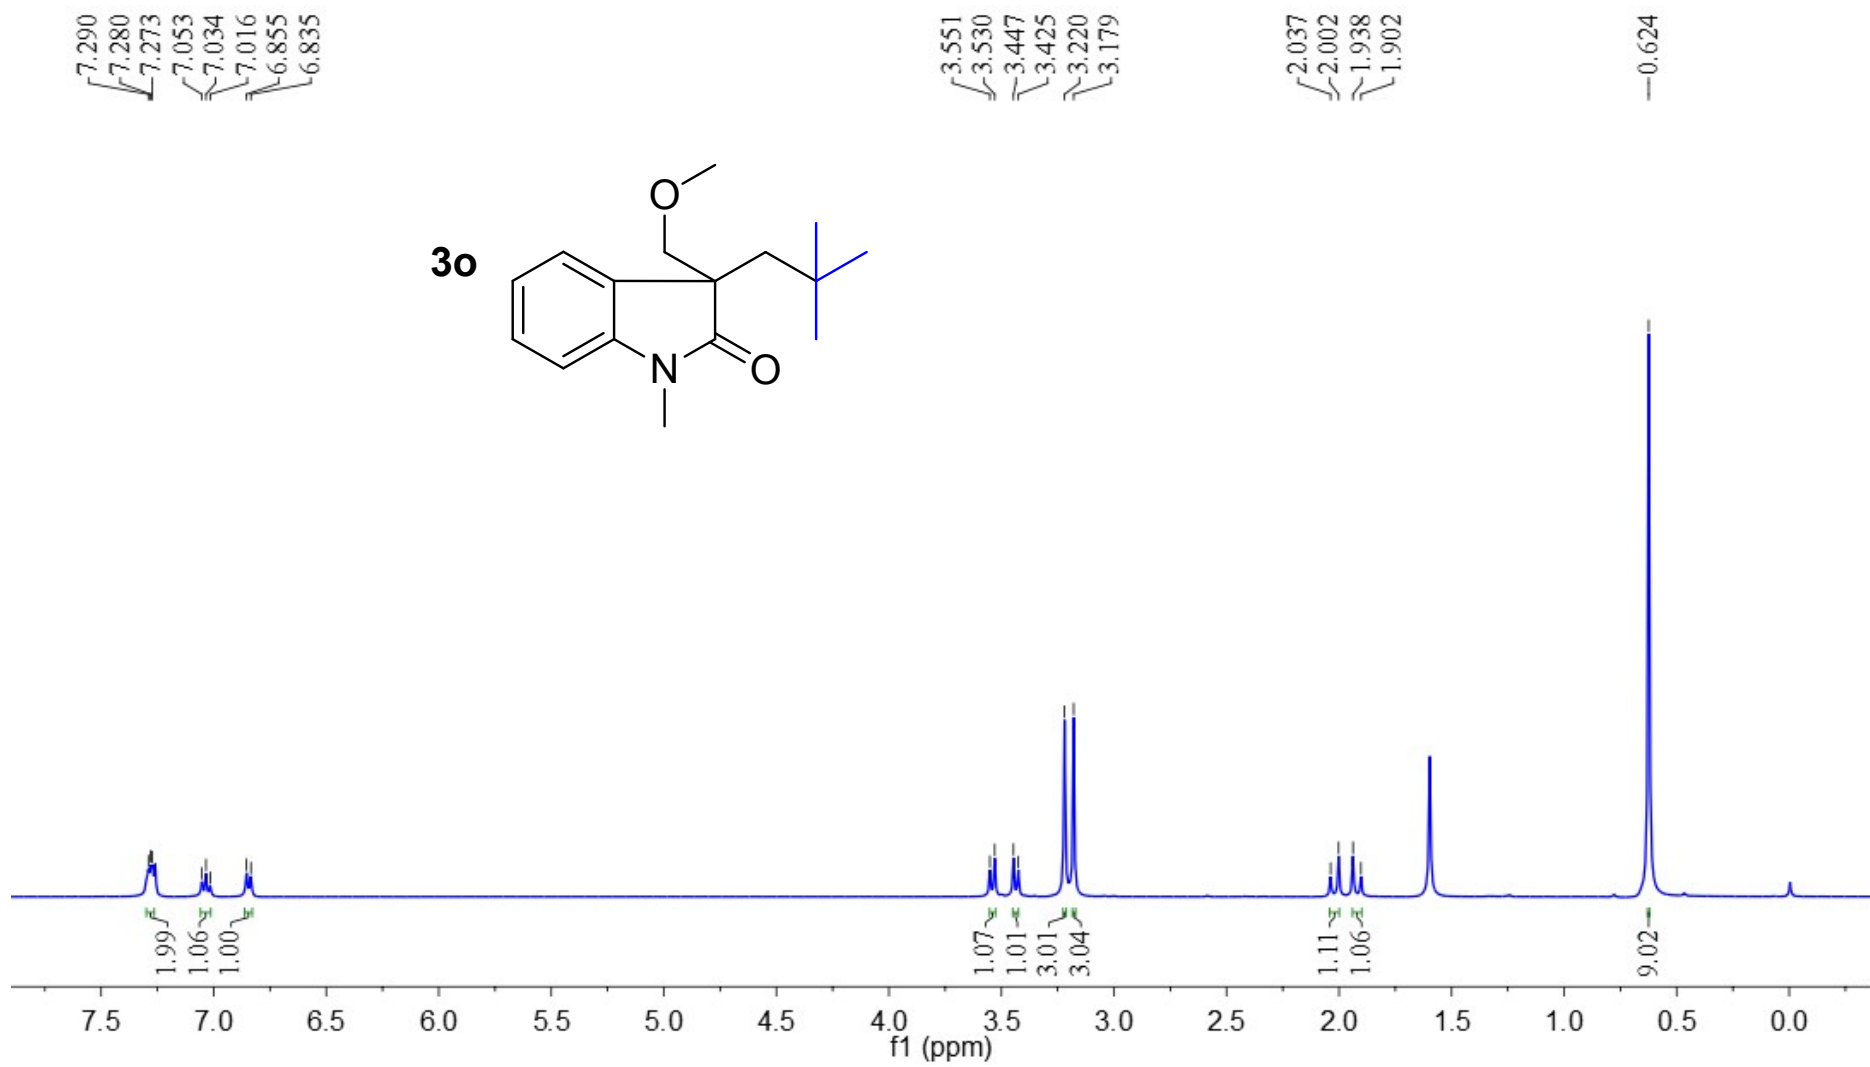

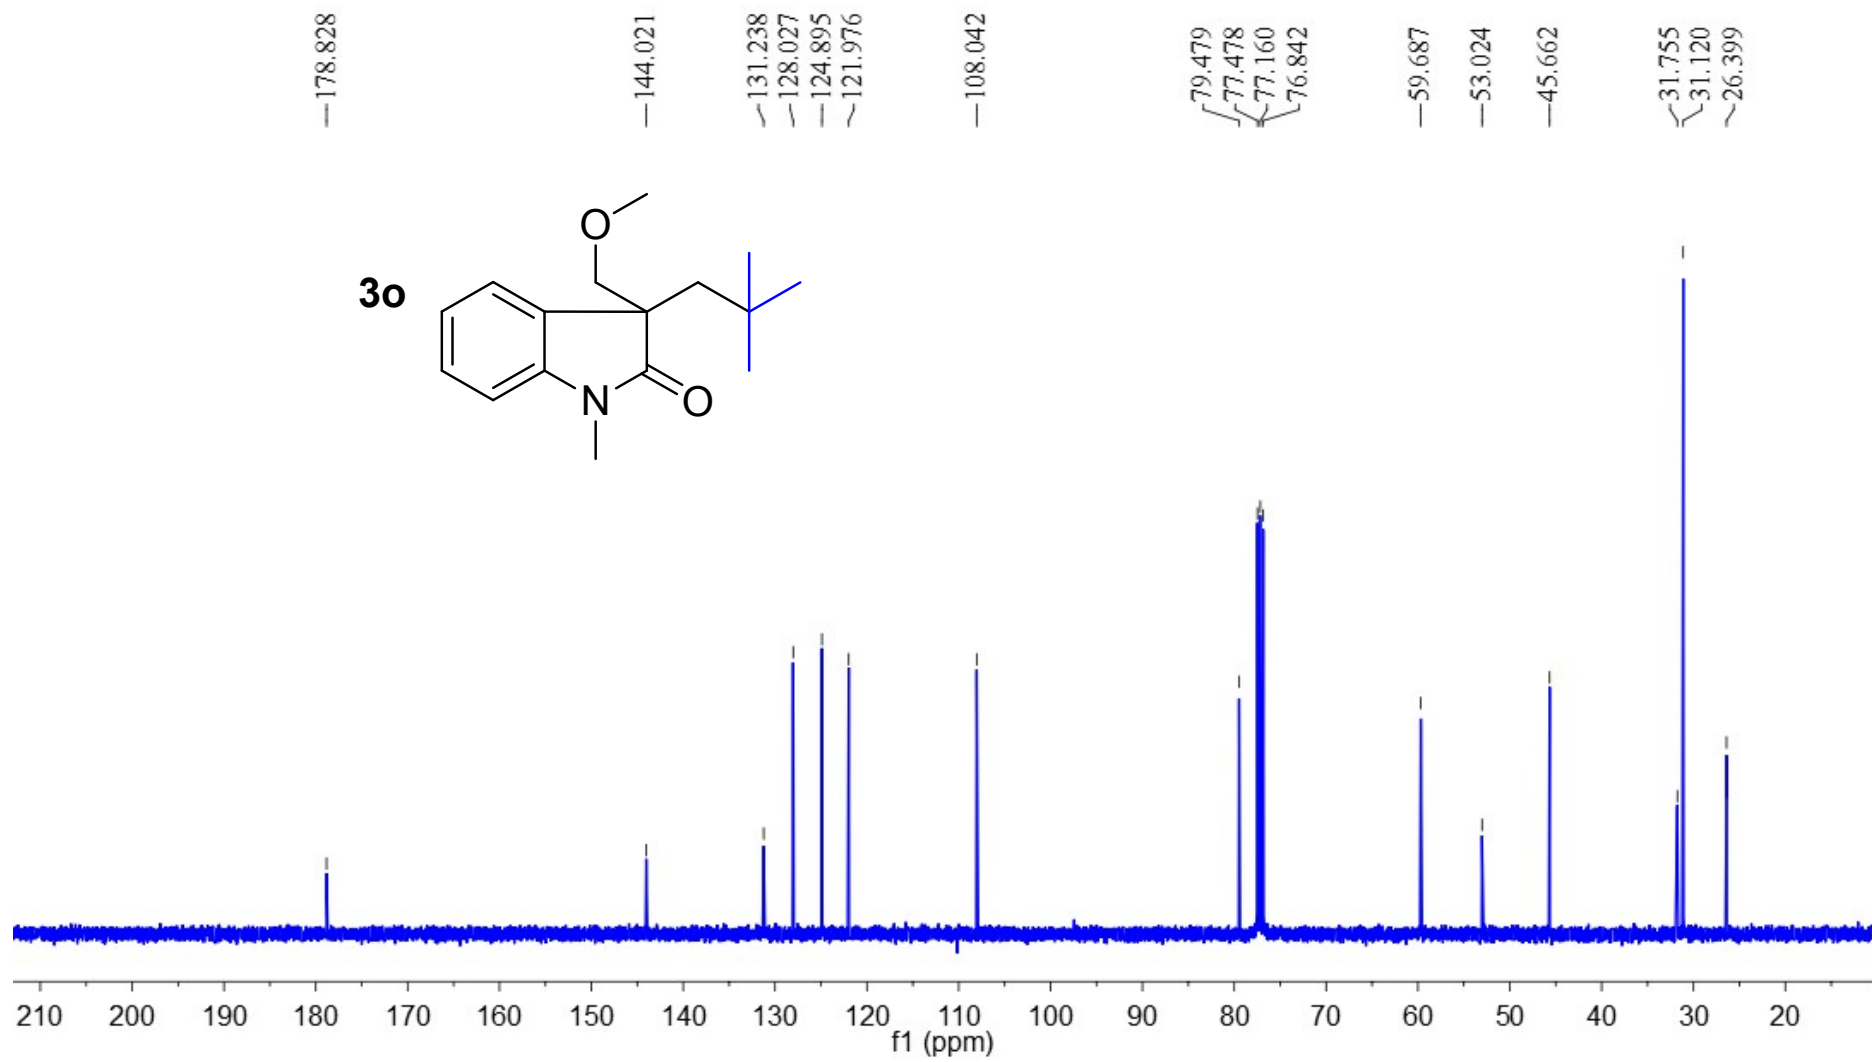

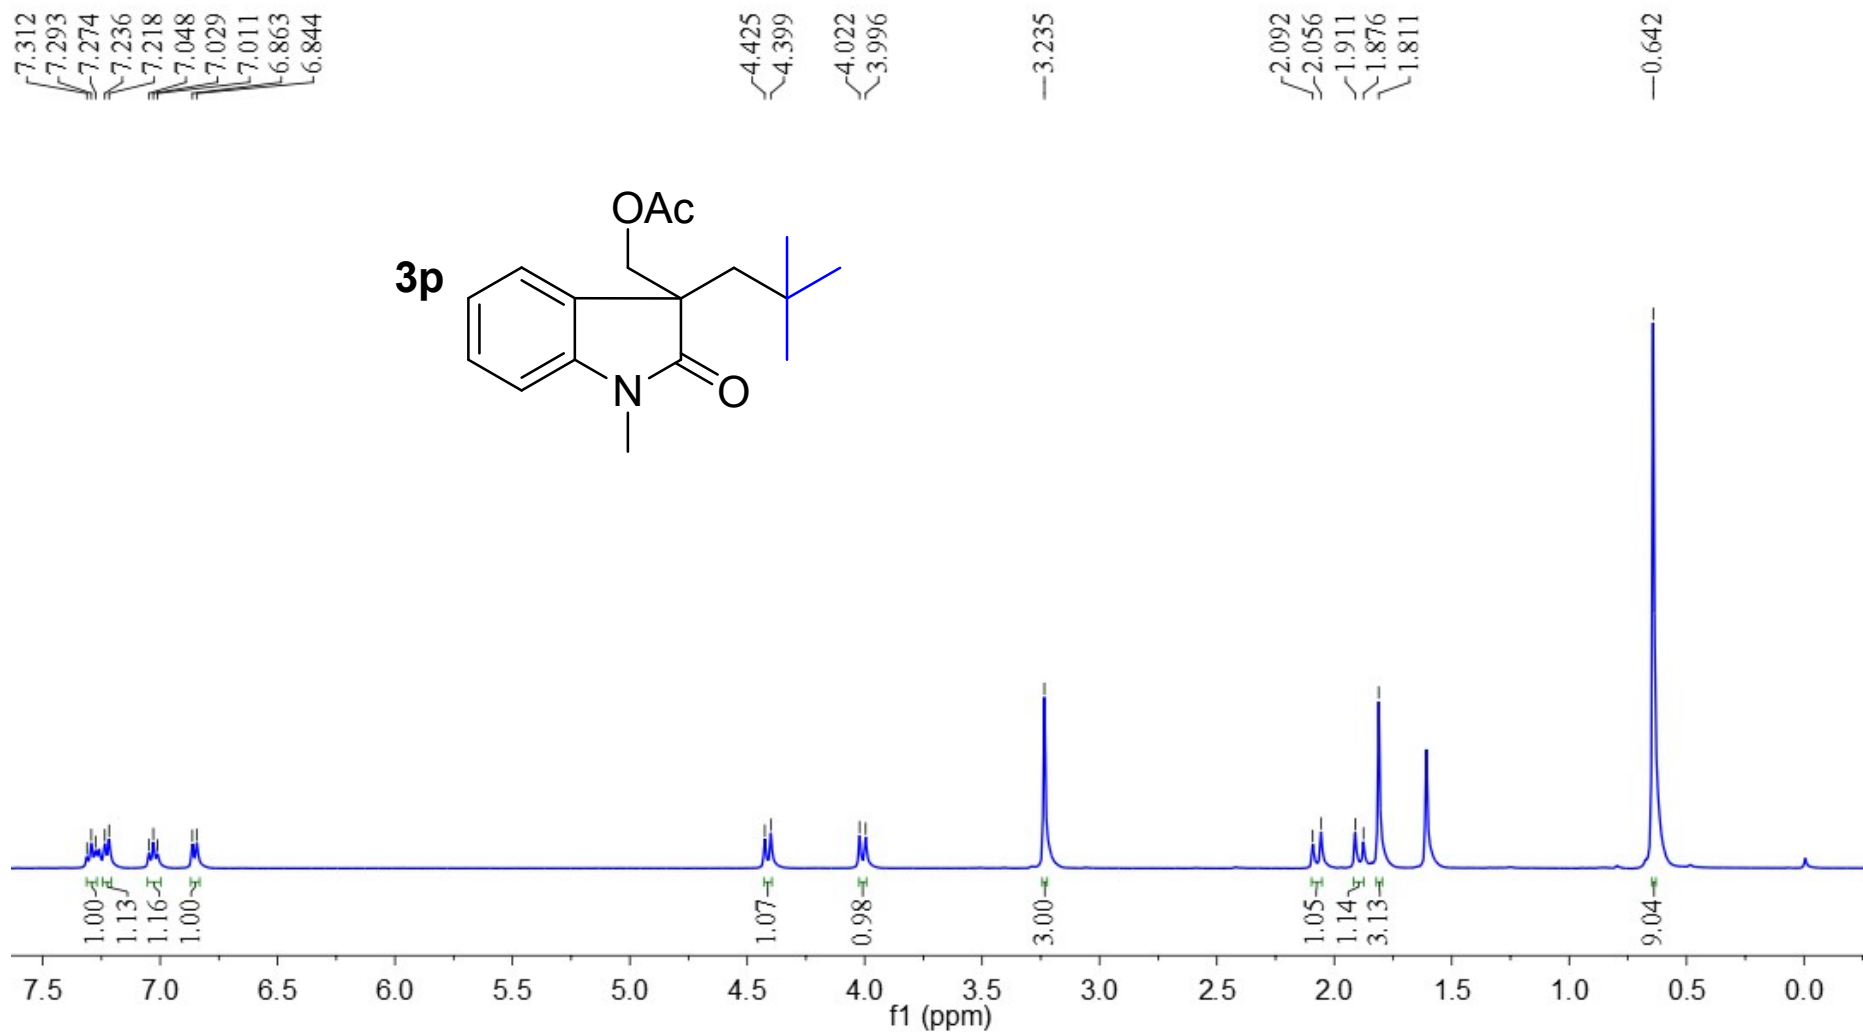

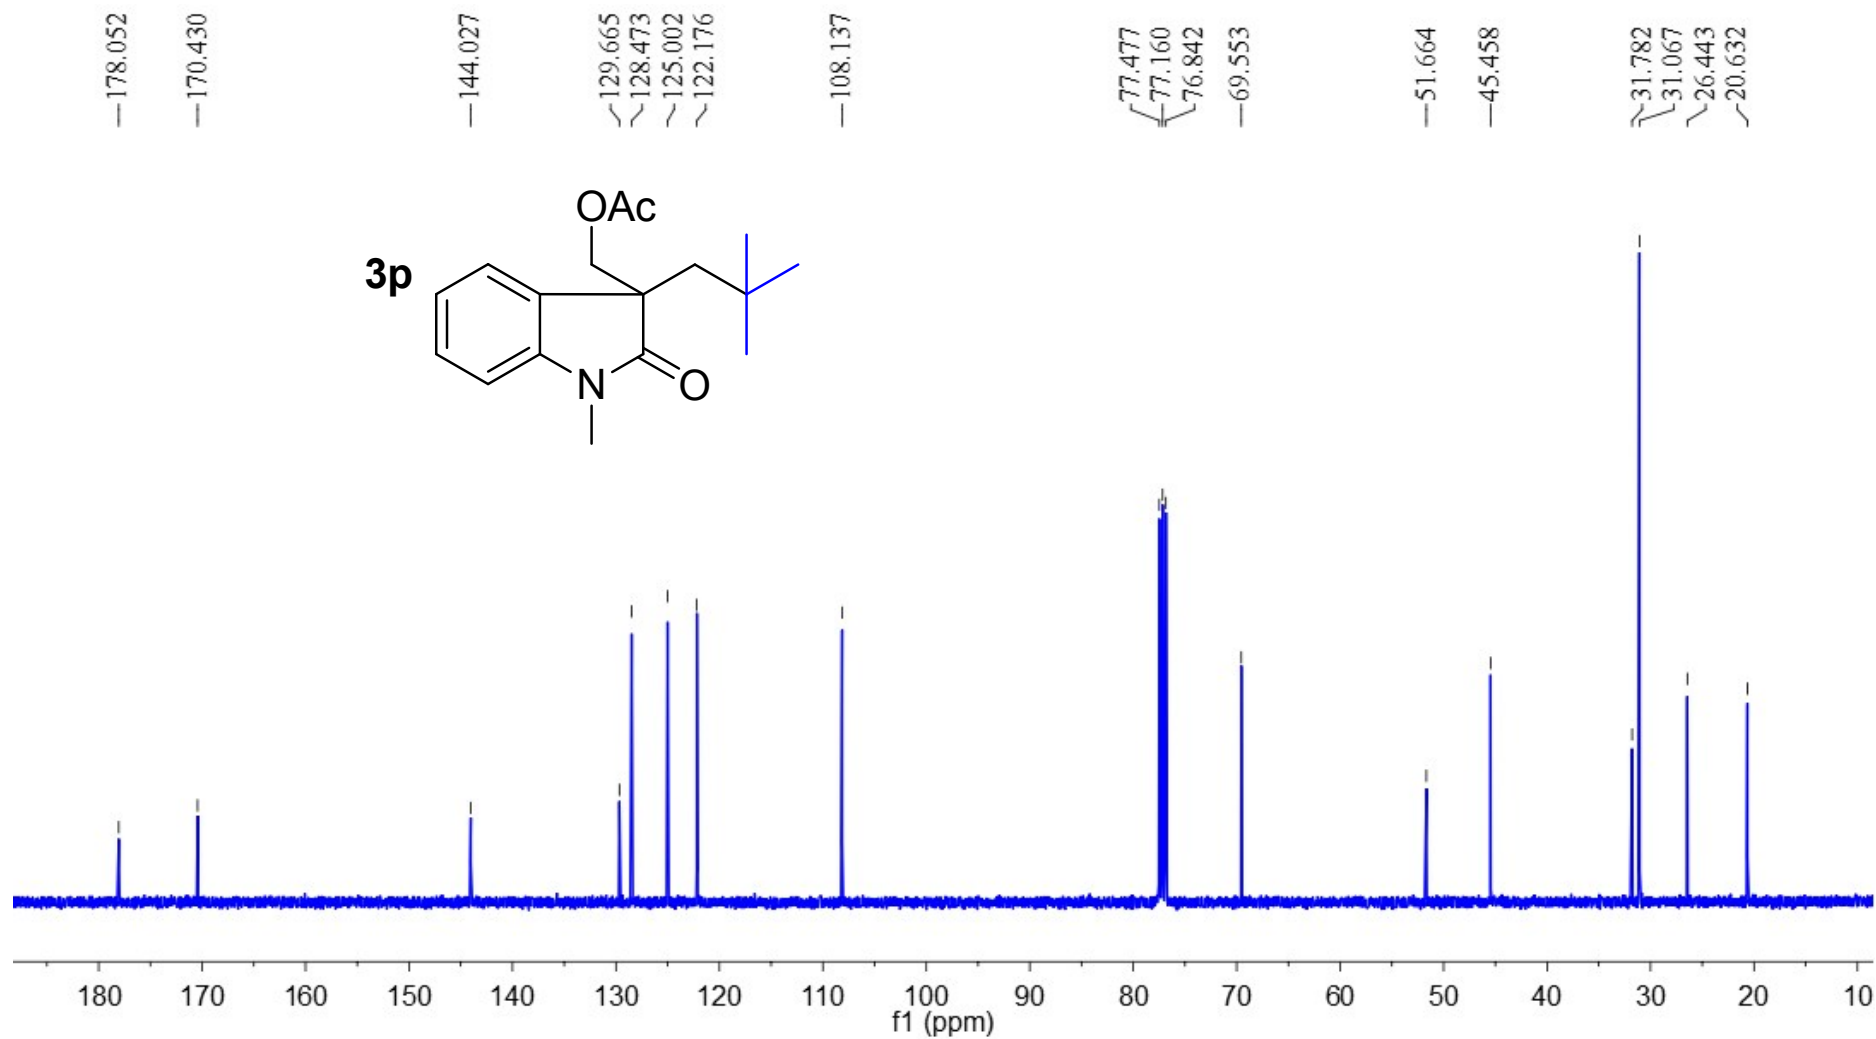

7.245  
7.225  
7.211  
7.193  
7.035  
7.016  
6.997  
6.876  
6.857

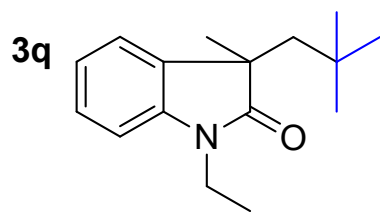

3.915  
3.897  
3.880  
3.862  
3.844  
3.826  
3.730  
3.712  
3.694  
3.676  
3.659  
3.641

2.178  
2.142  
1.873  
1.837

1.276  
1.262  
1.244

-0.631

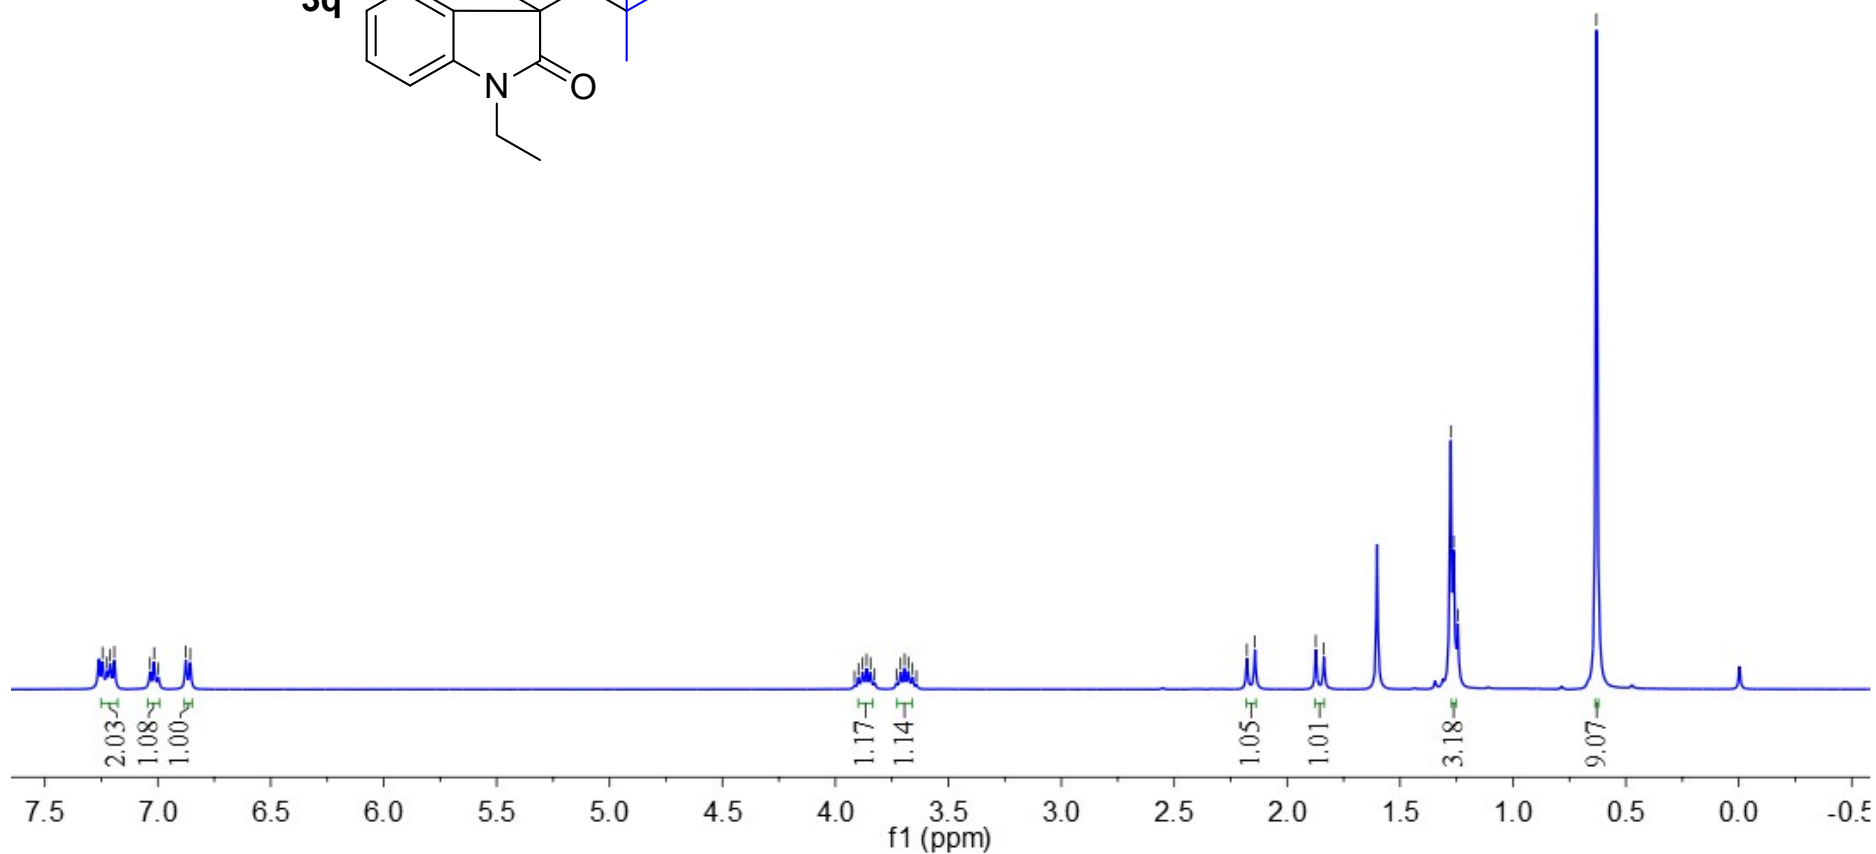

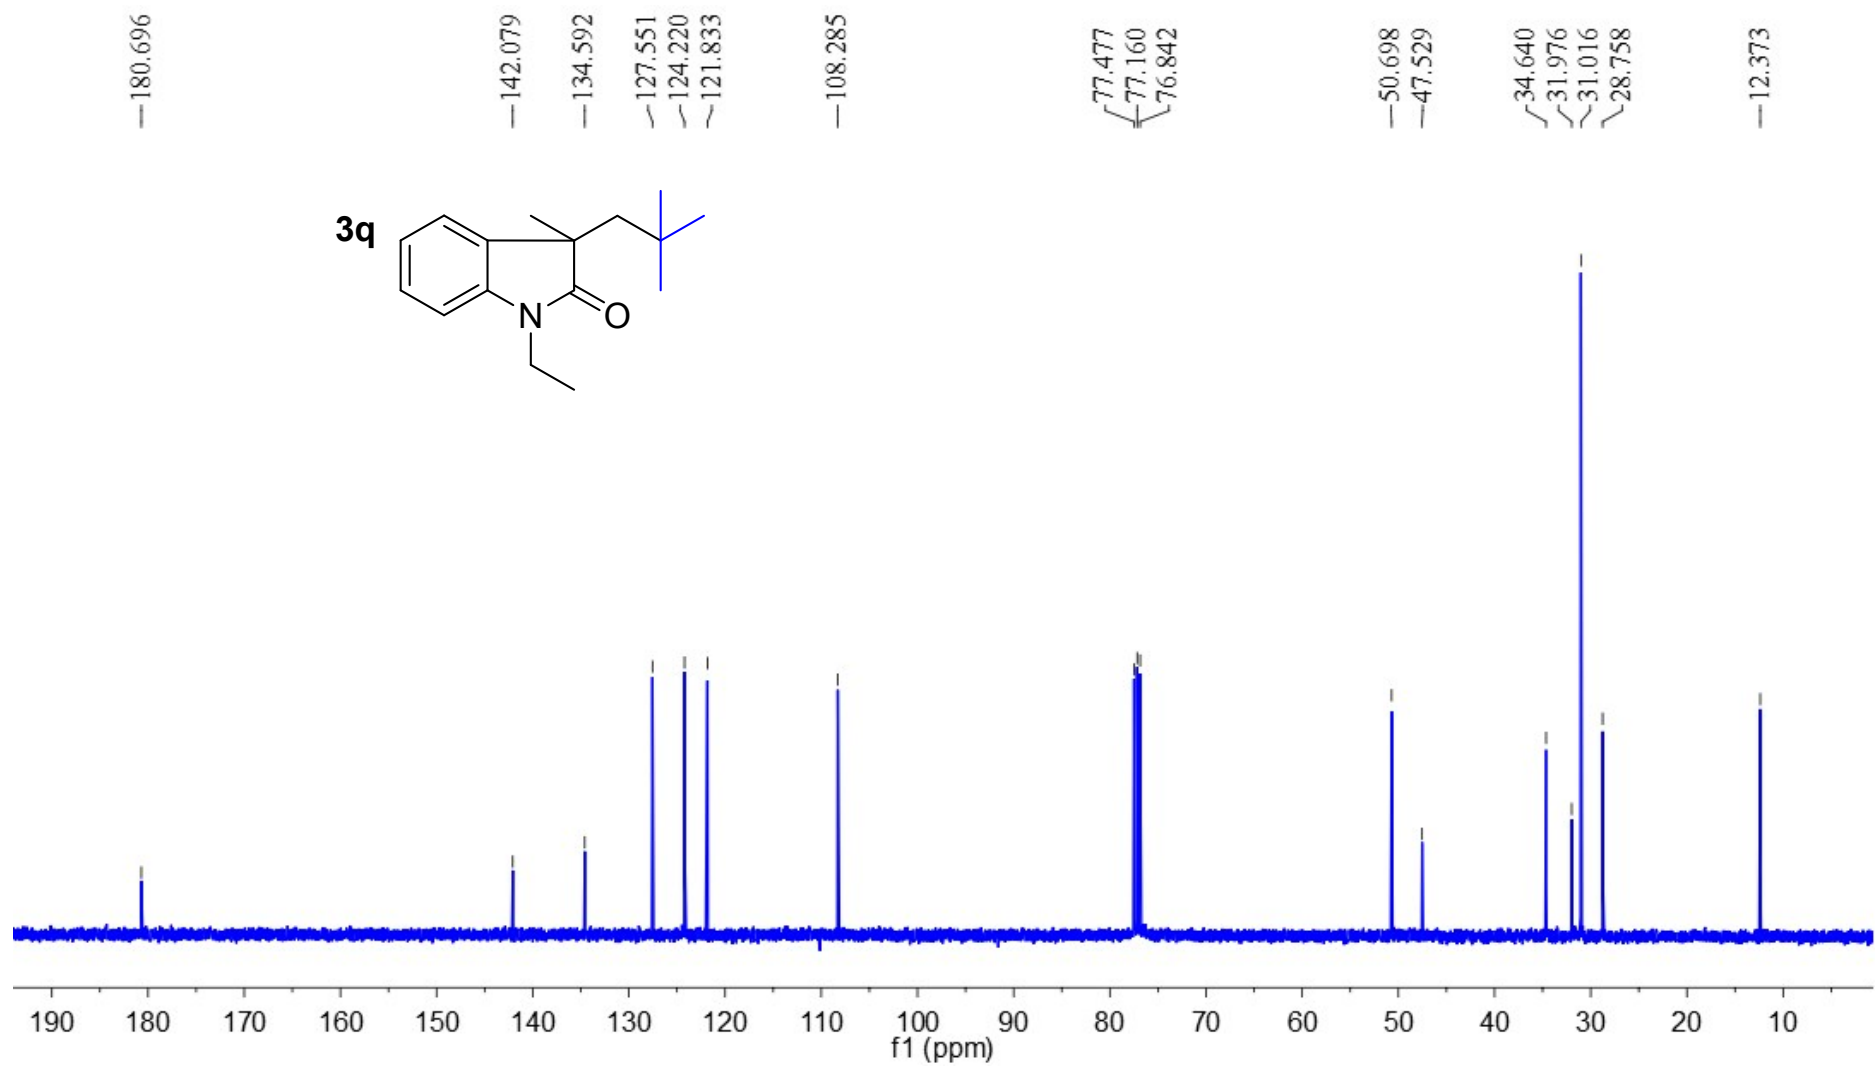



7.538  
7.519  
7.500  
7.425  
7.406  
7.391  
7.372  
7.279  
7.260  
7.203  
7.184  
7.165  
7.084  
7.066  
7.048  
6.867  
6.847

3r

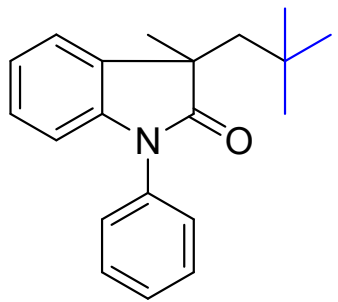

2.273  
2.237  
1.964  
1.928  
-1.422  
-0.728

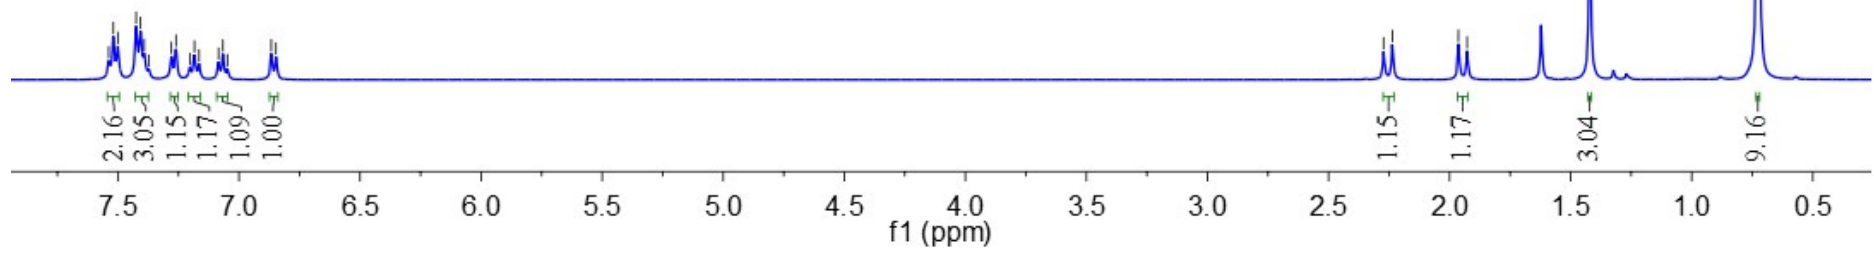

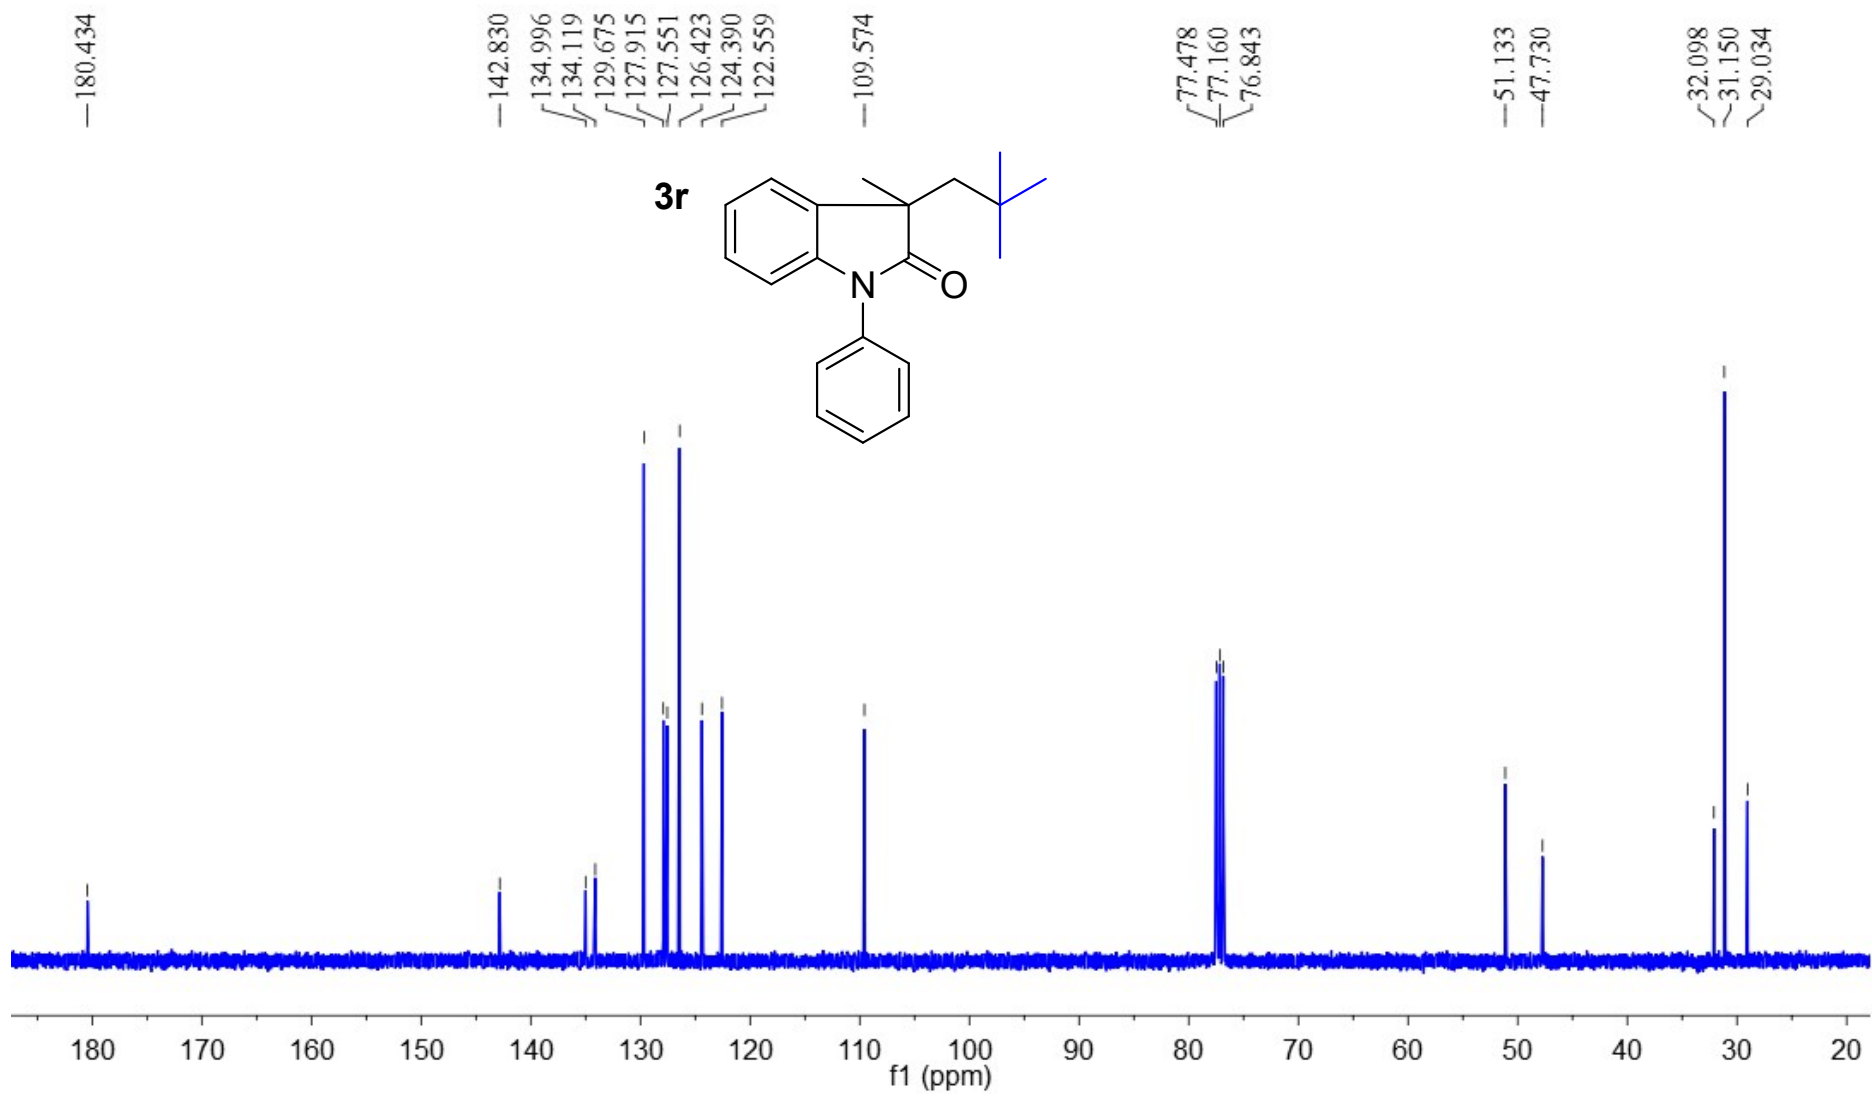

7.316  
7.302  
7.282  
7.213  
7.195  
7.146  
7.127  
7.014  
6.996  
6.783  
6.764

5.077  
5.038  
4.803  
4.764

2.231  
2.195  
1.920  
1.884

1.346

0.637

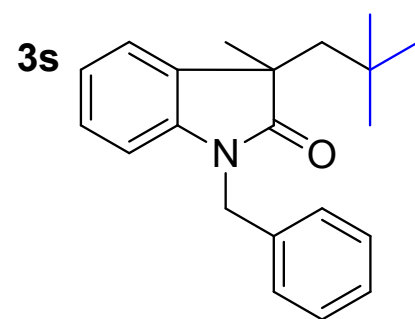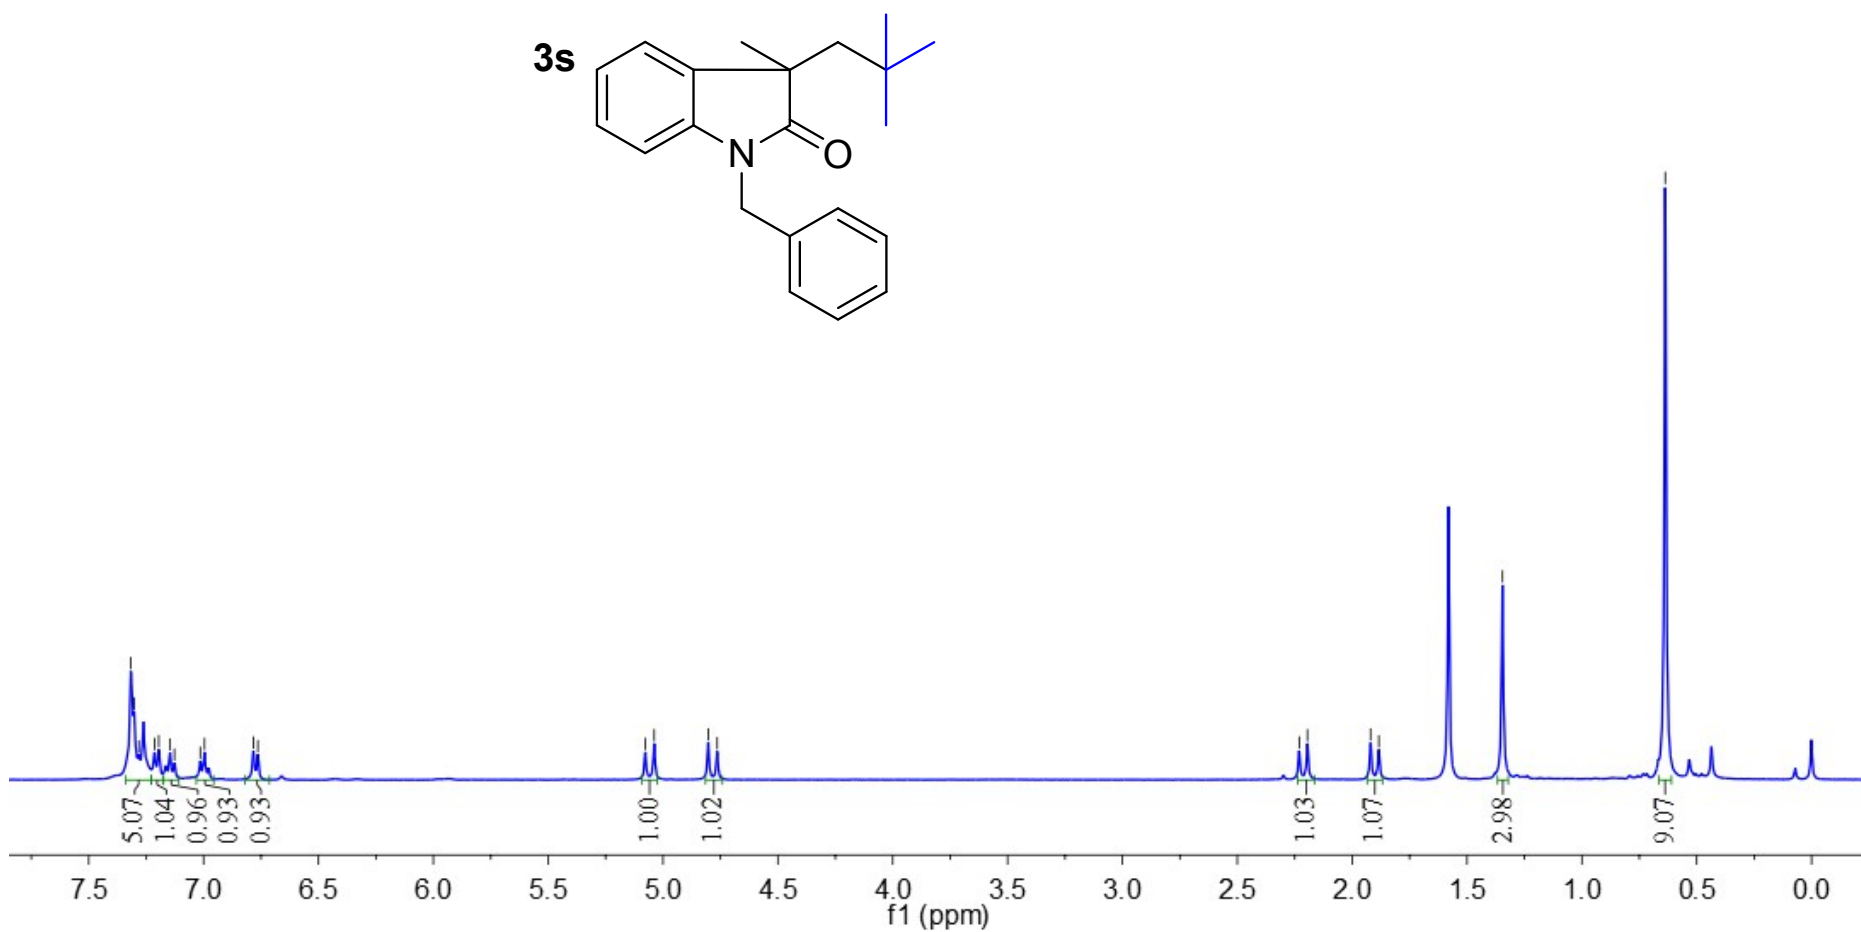

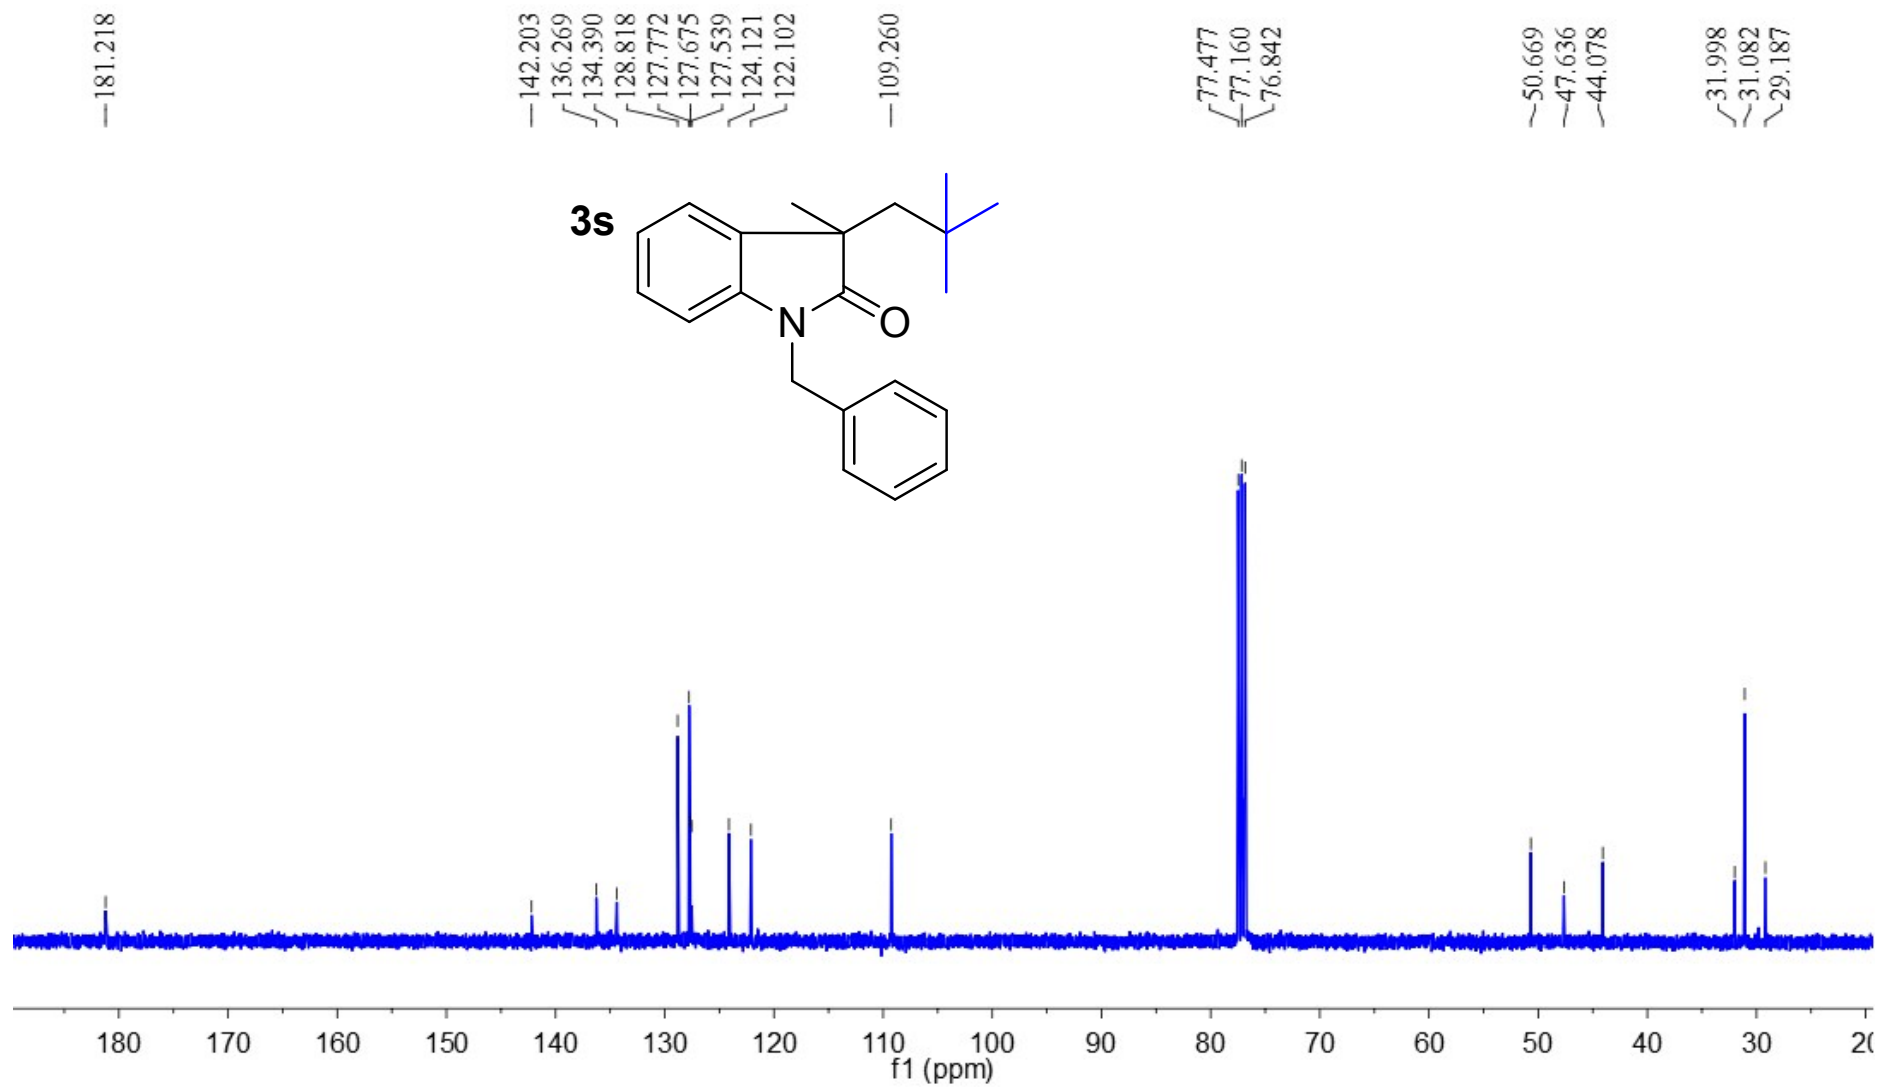

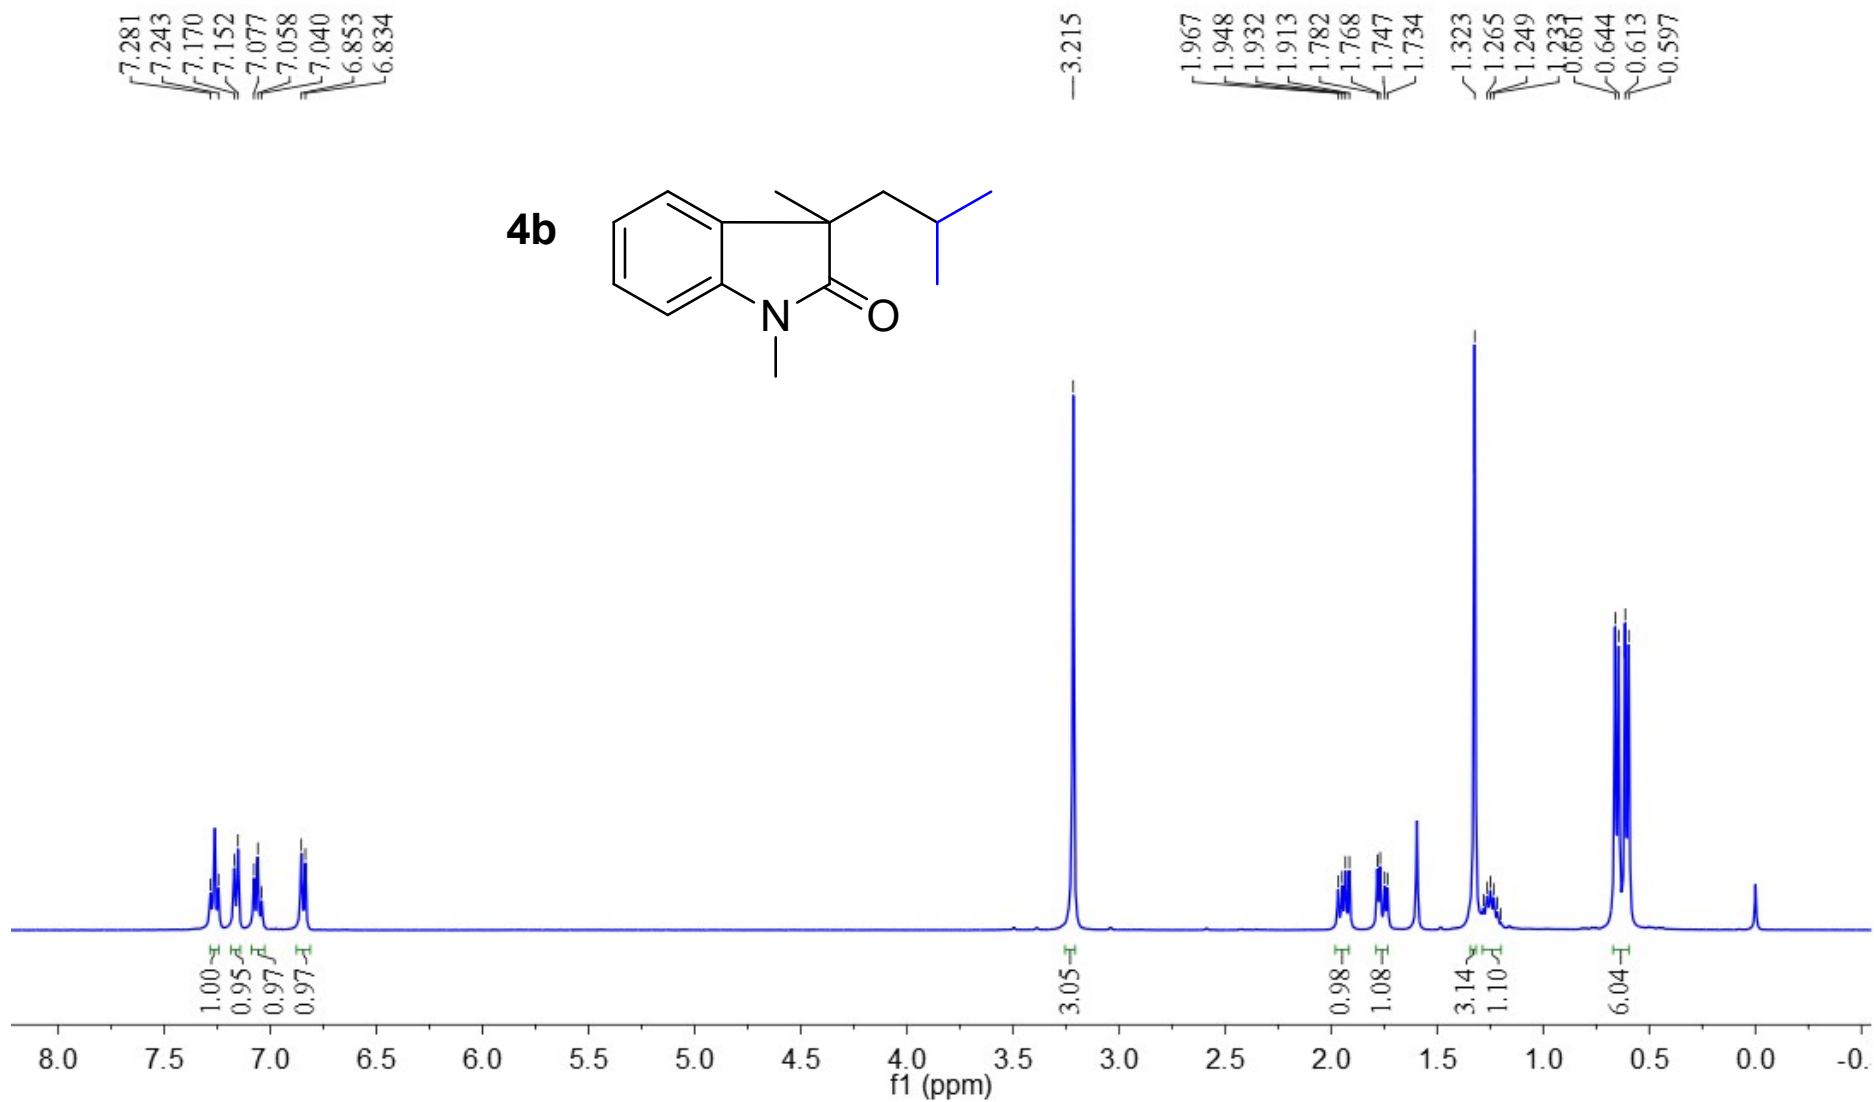

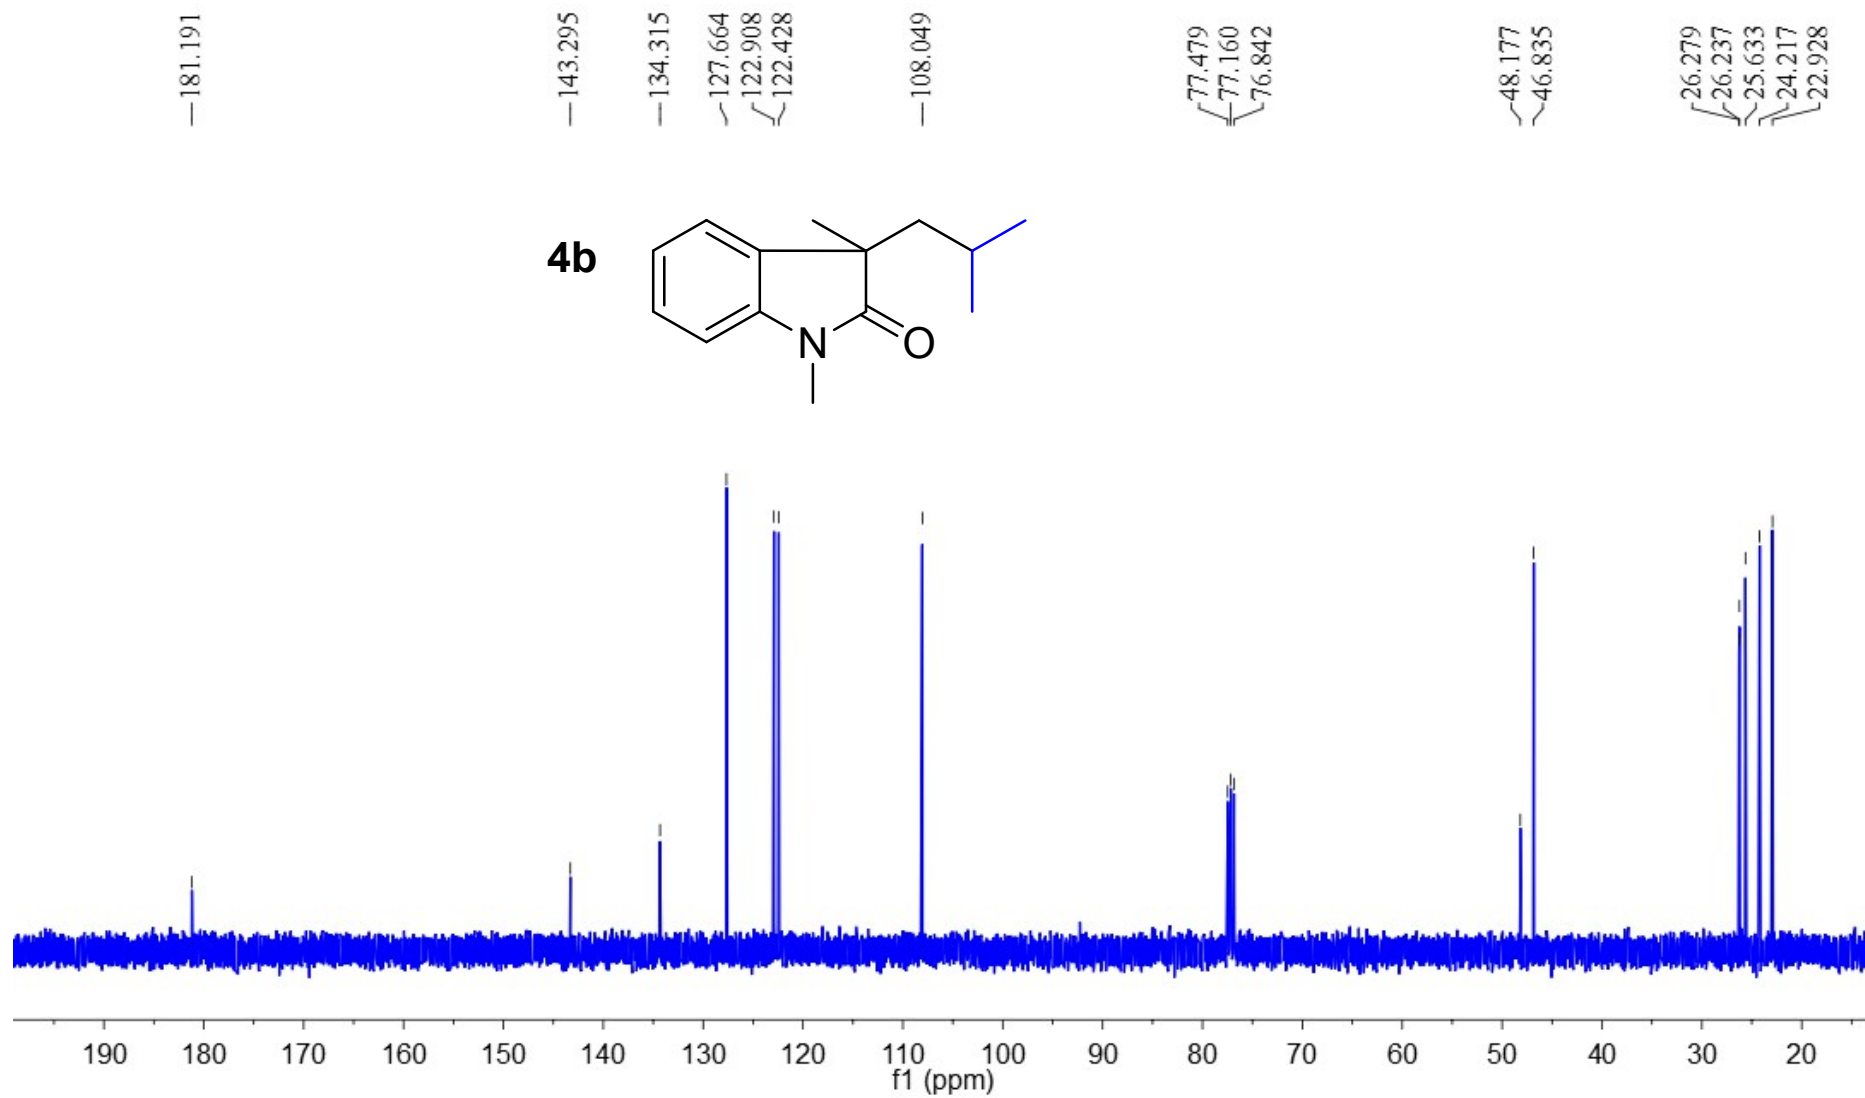

7.279  
7.243  
7.184  
7.165  
7.155  
7.136  
7.078  
7.071  
7.059  
7.053  
7.041  
7.034  
6.855  
6.845  
6.836  
6.827

3.214  
2.011  
1.998  
1.867  
1.853  
1.675  
1.659  
1.624  
1.329  
1.086  
1.067  
1.057  
1.045  
1.009  
0.991  
0.974  
0.957  
0.938  
0.737  
0.719  
0.704  
0.686  
0.608  
0.592  
0.497  
0.481

4c

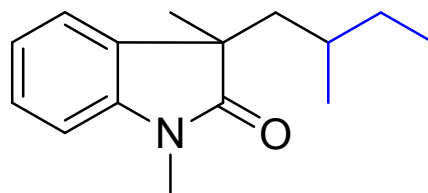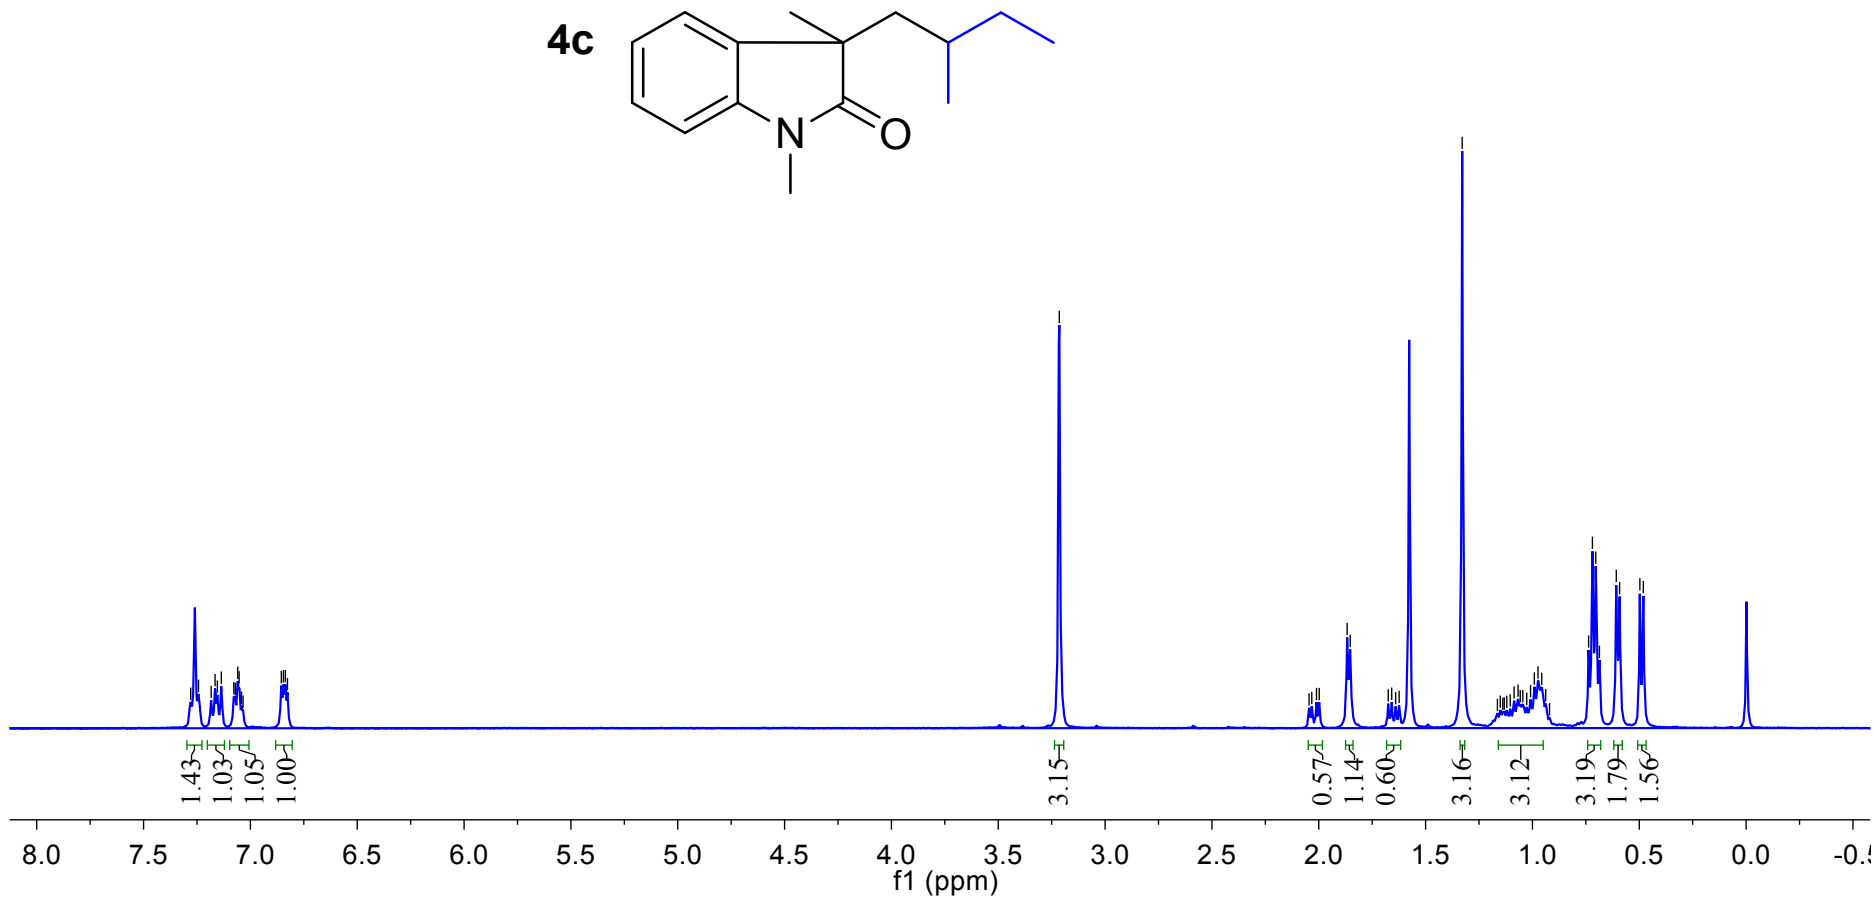

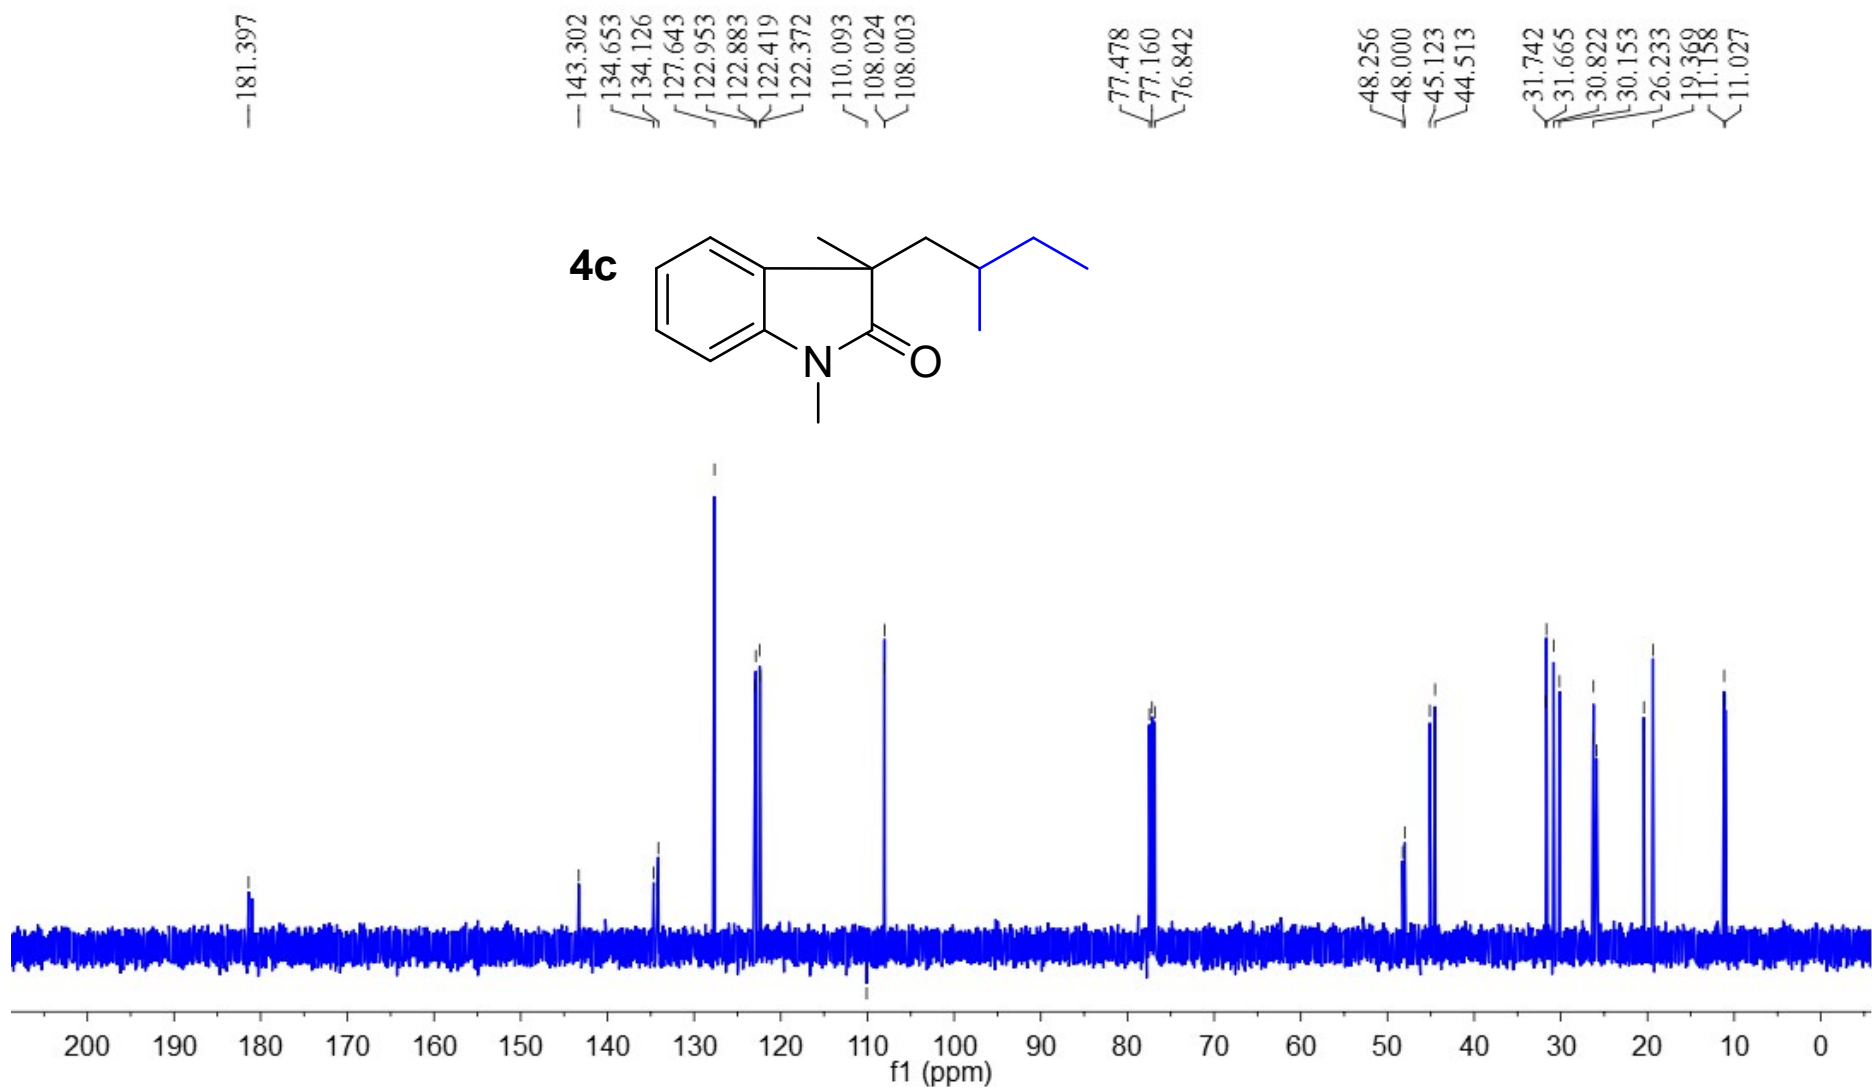



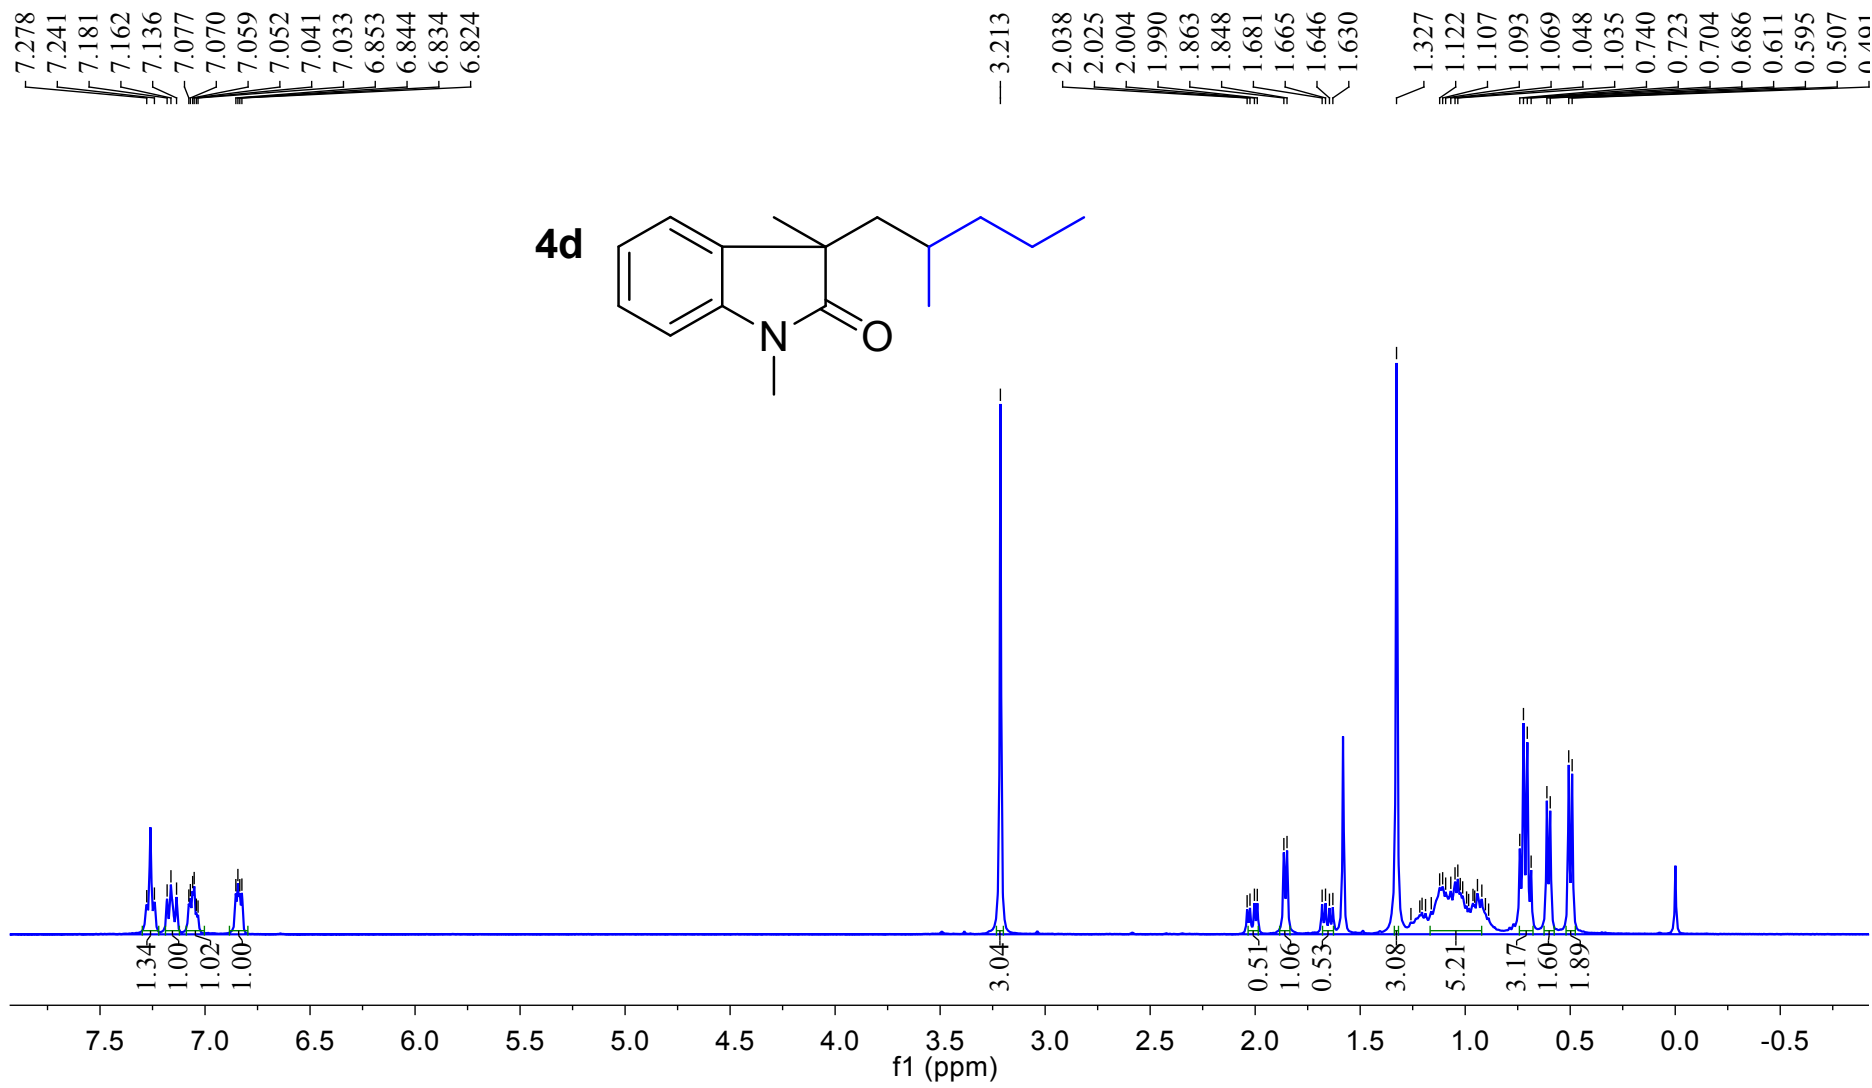

181.323  
180.972

143.263  
143.220  
134.587  
134.087  
127.575  
124.234  
122.916  
122.815  
122.349  
122.287  
107.945  
107.912

77.384  
77.066  
76.750  
71.850

48.169  
47.959  
45.475  
44.831  
40.462  
39.721

29.866  
29.715  
26.158  
26.140  
25.798  
20.910  
19.907  
19.653  
19.613  
14.156  
14.008

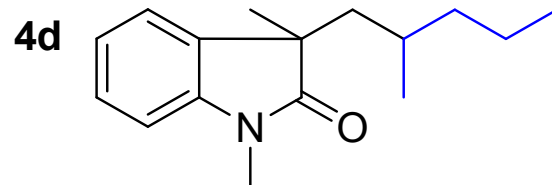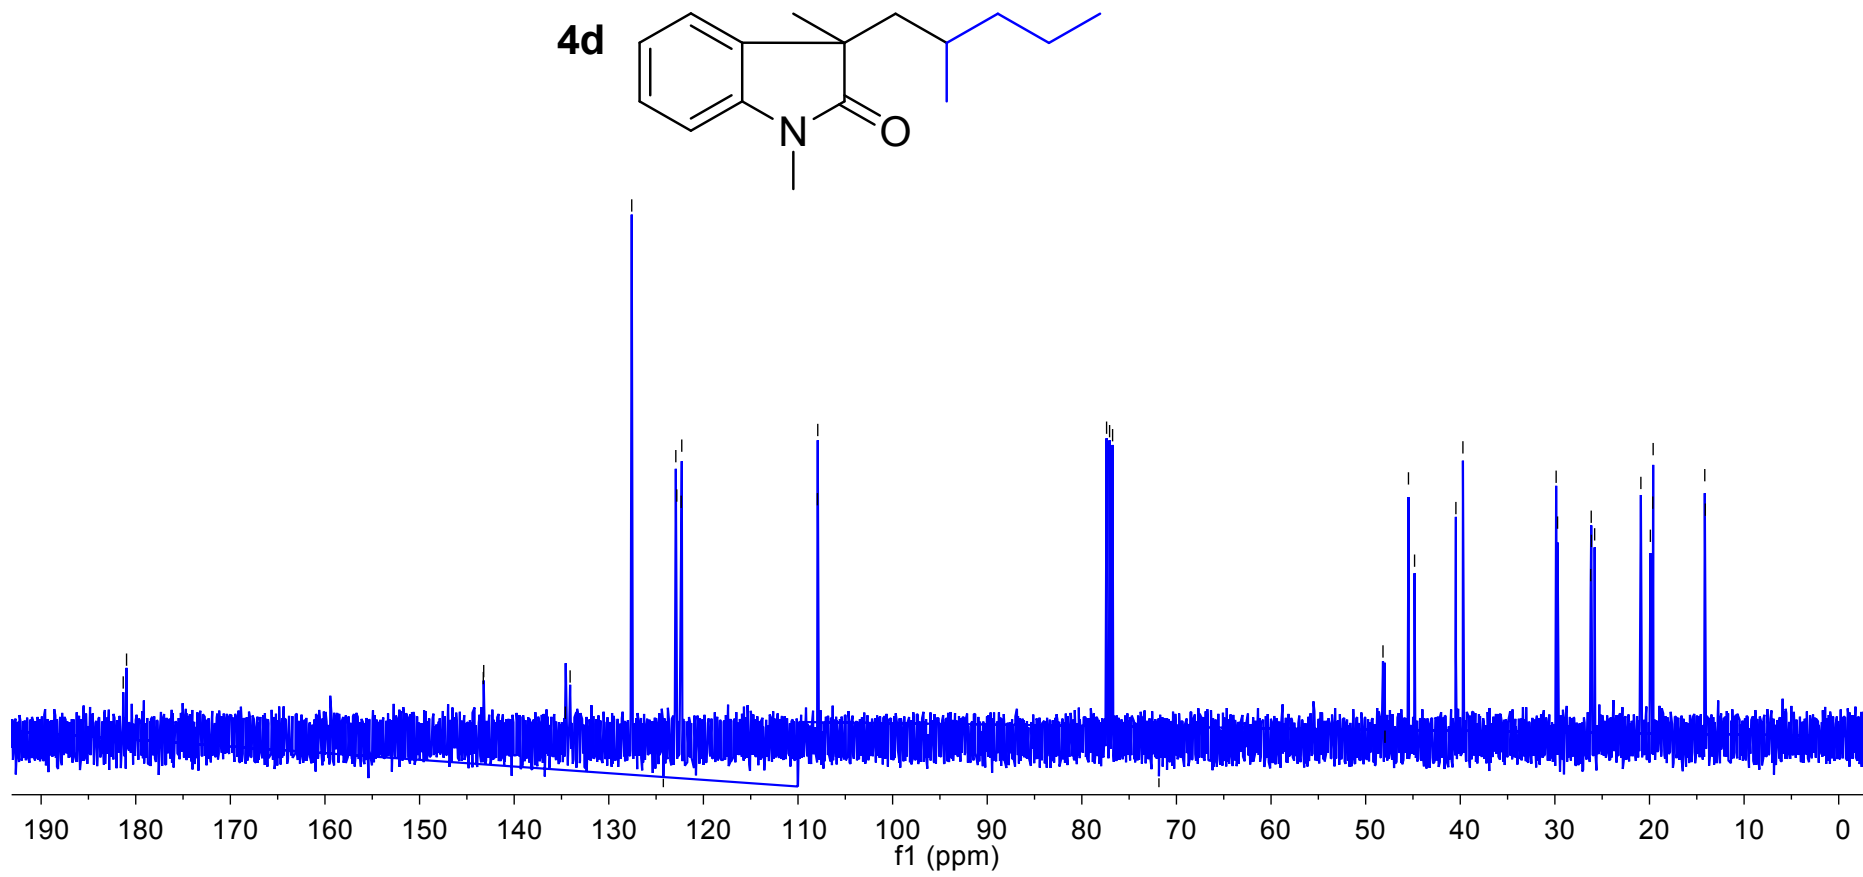

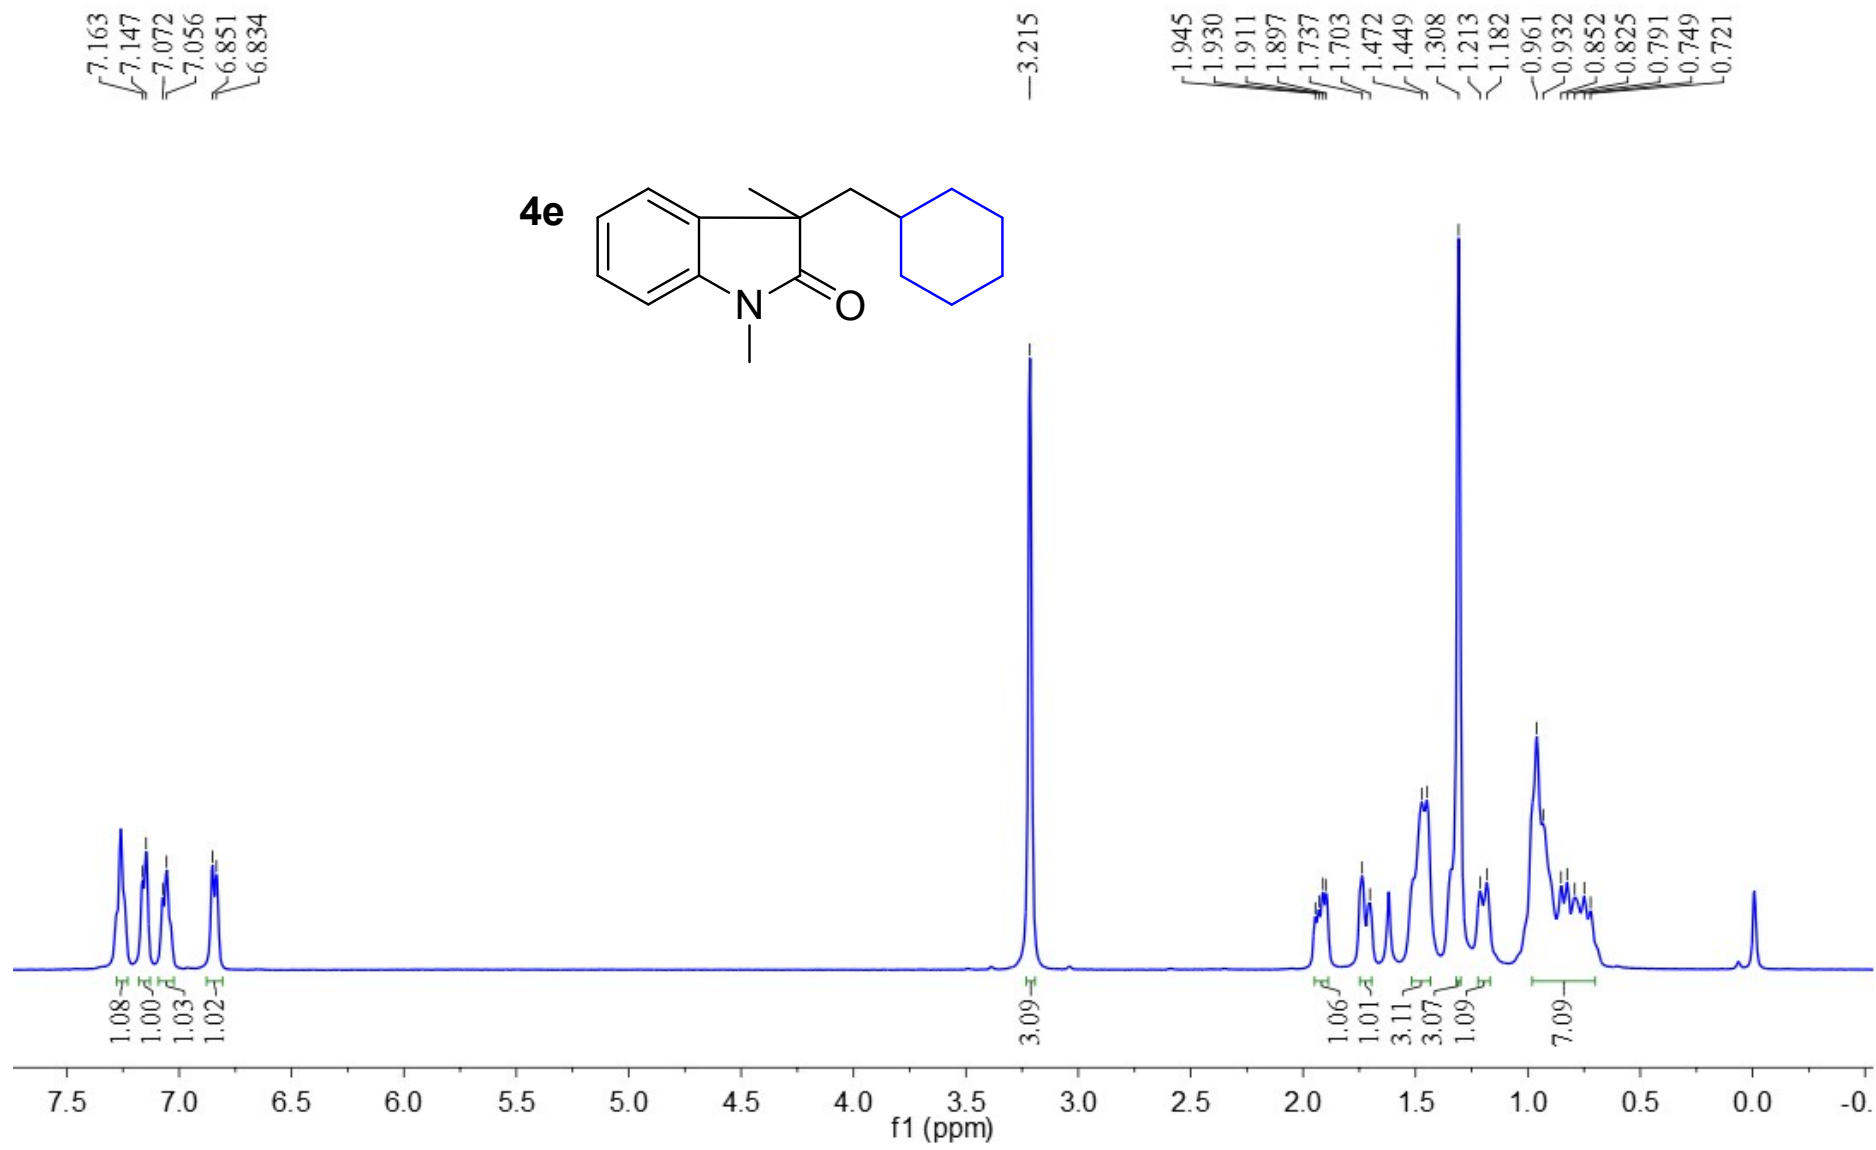

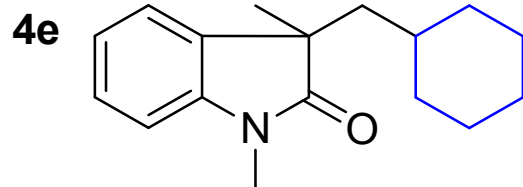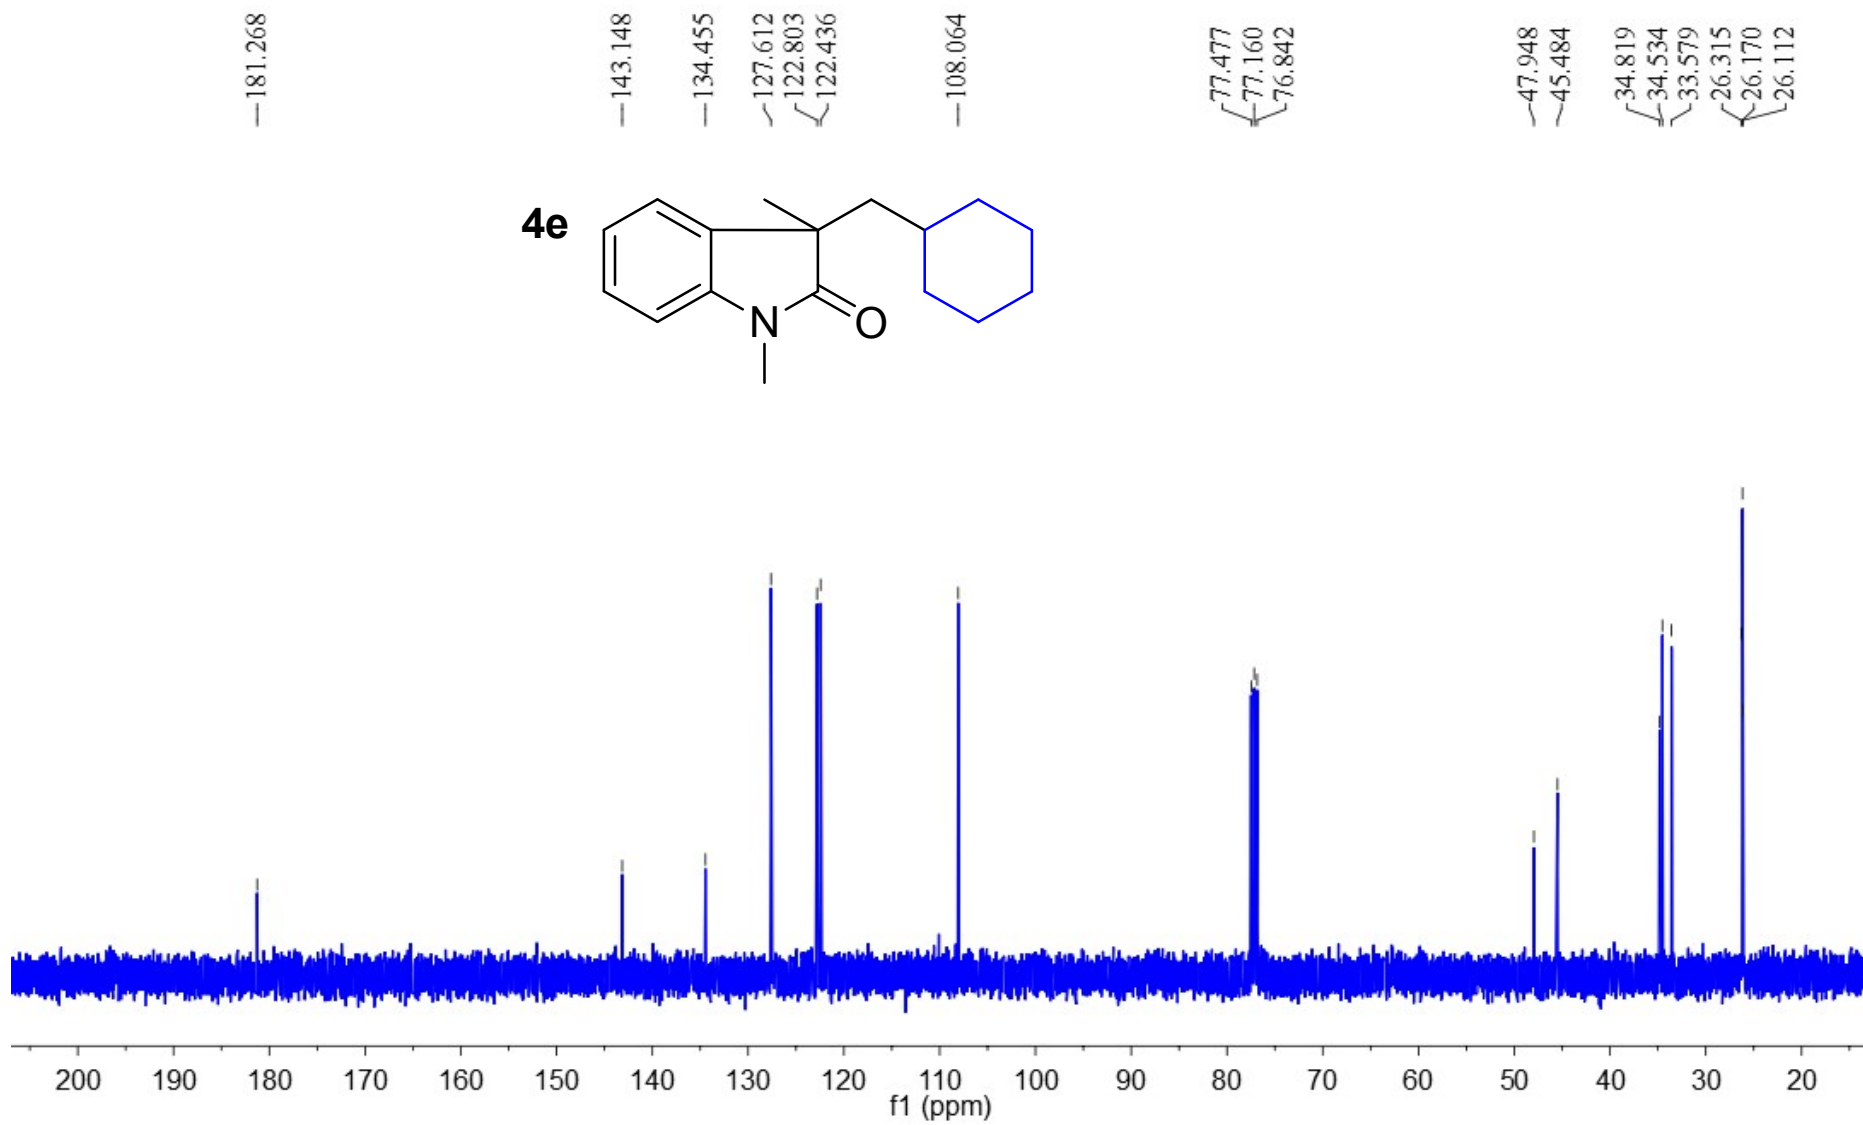

7.280  
7.244  
7.168  
7.150  
7.082  
7.063  
7.045  
6.847  
6.828

3.212  
1.908  
1.887  
1.876  
1.855  
1.844  
1.763  
1.753  
1.731  
1.721  
1.698  
1.346

0.908  
0.889  
0.876  
0.860  
0.844  
0.786  
0.769  
0.753  
0.723  
0.712  
0.691  
0.679  
0.662

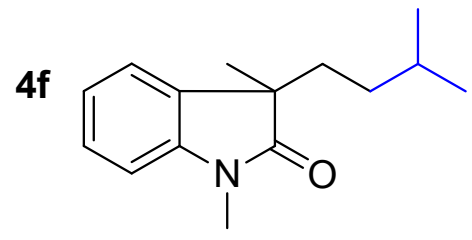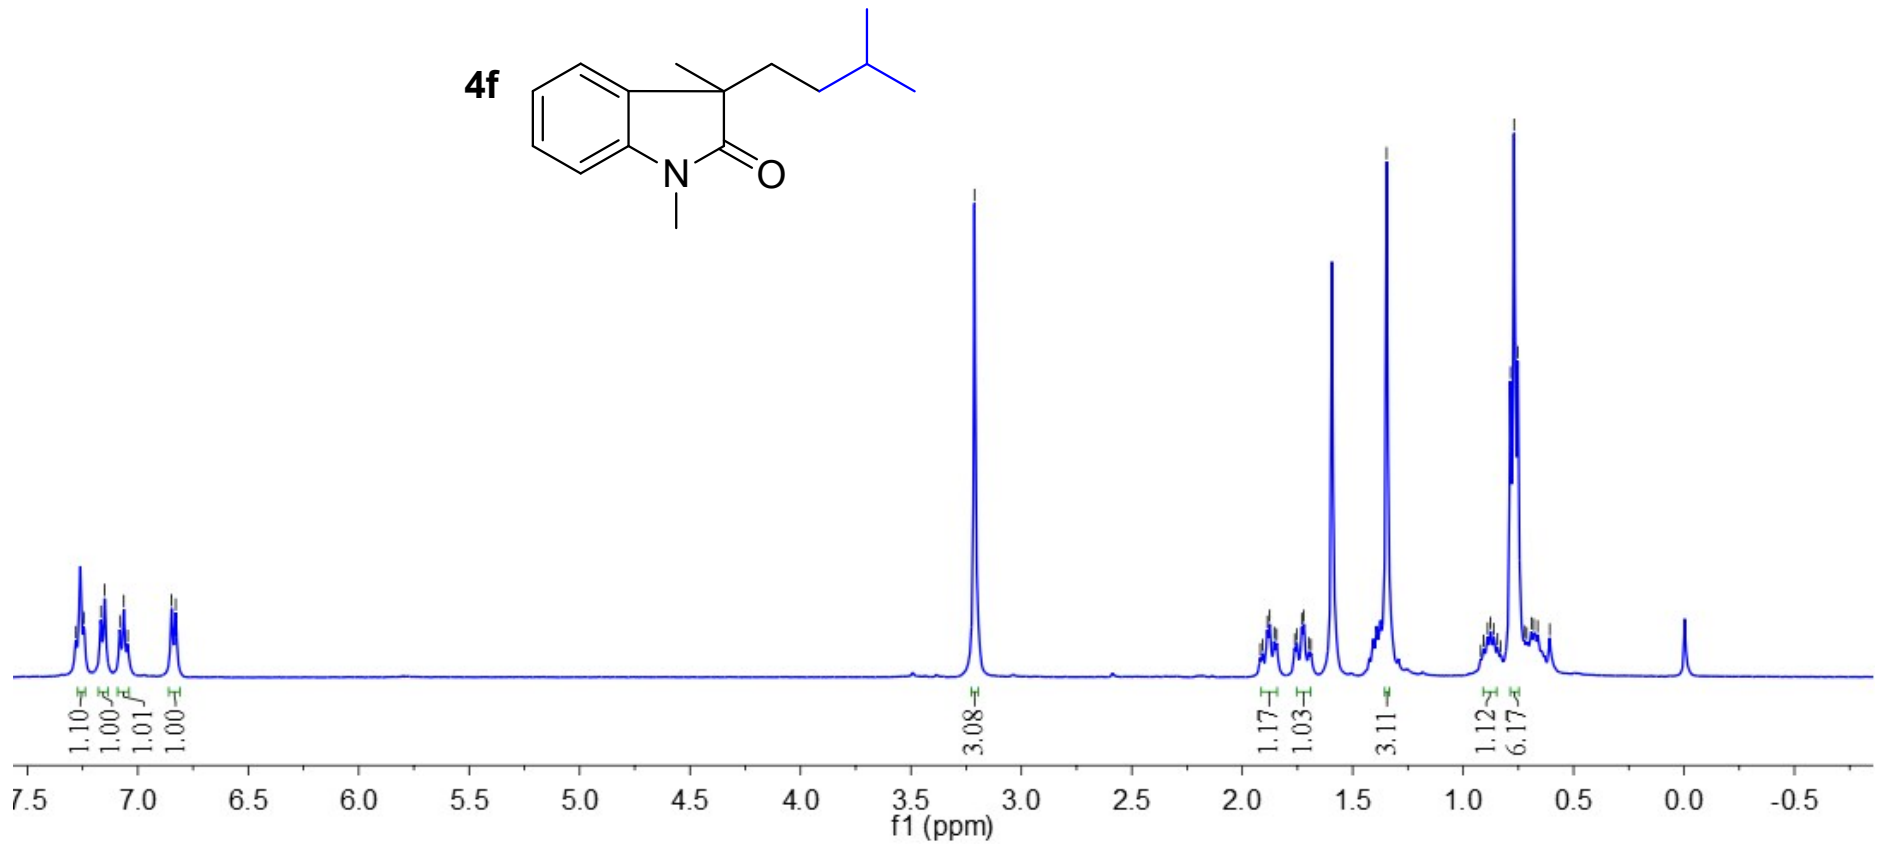

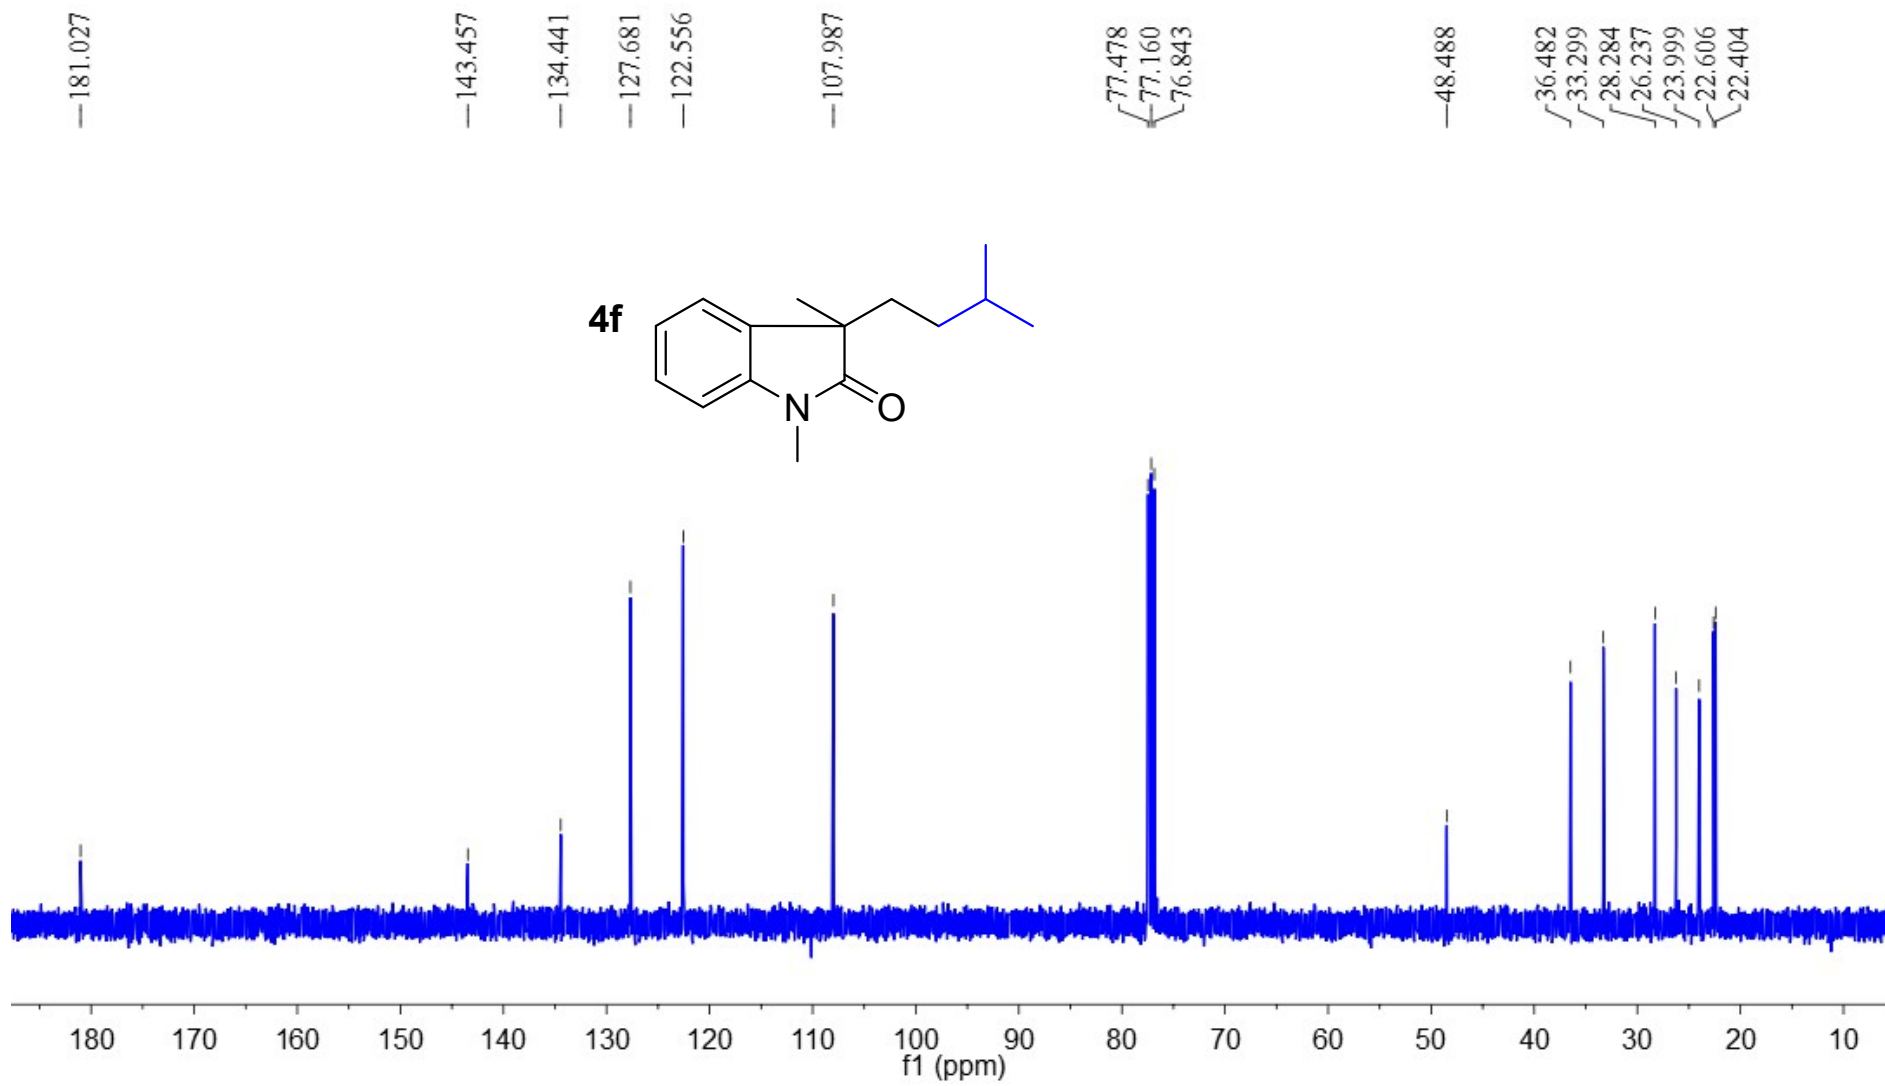

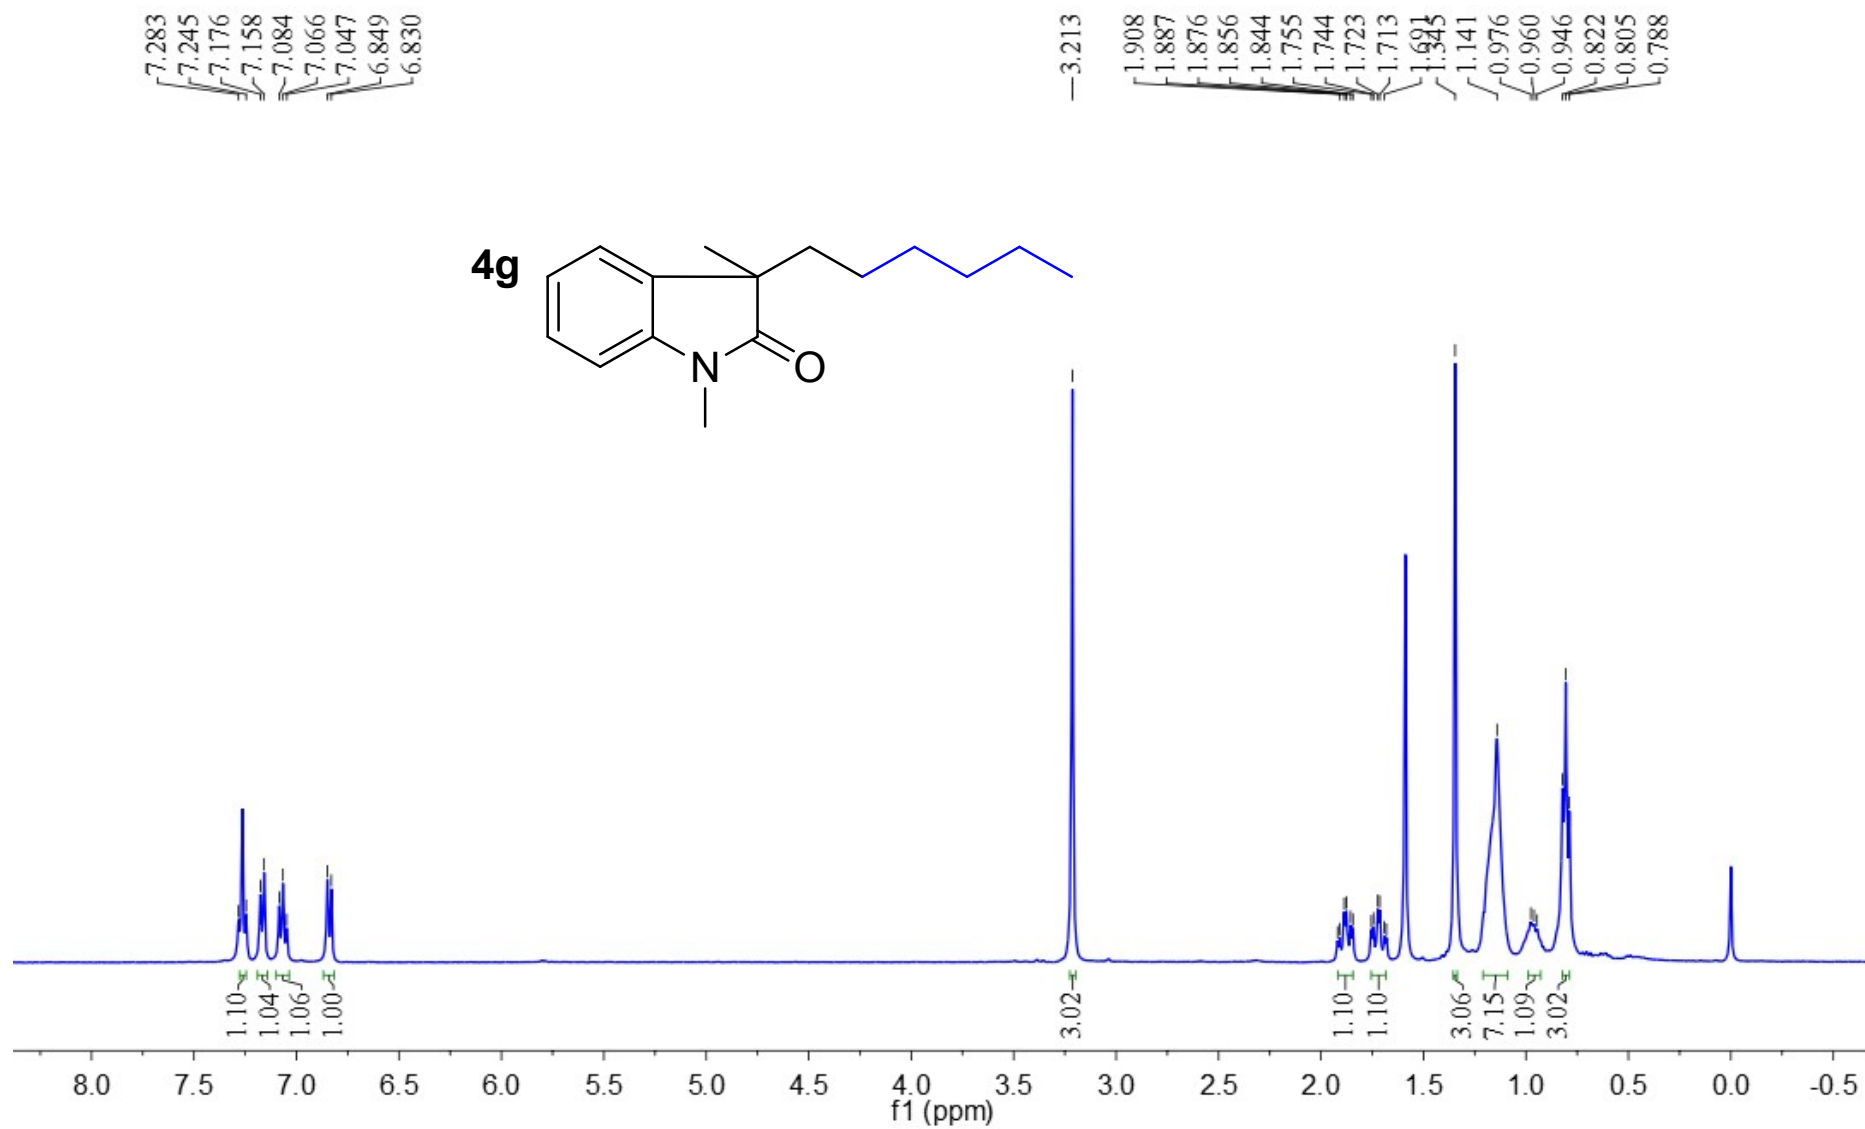

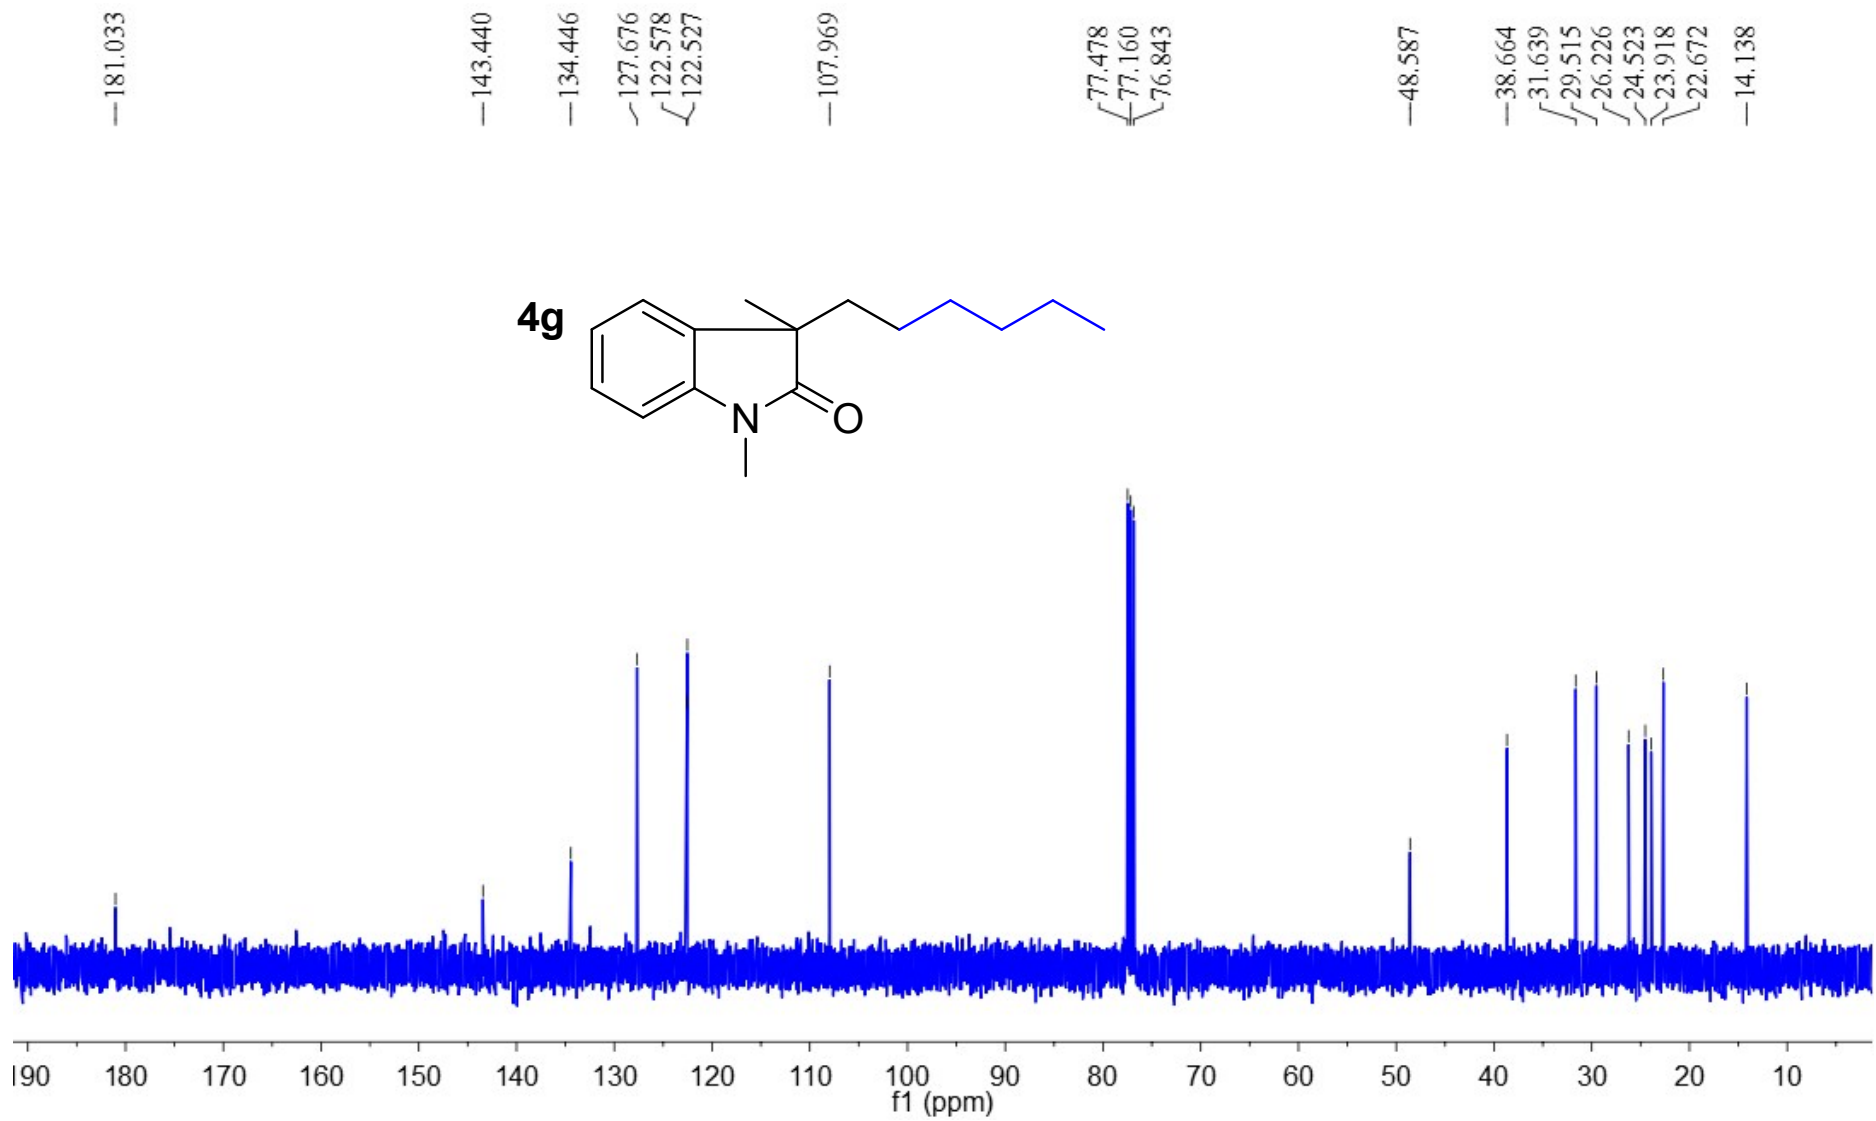



4h

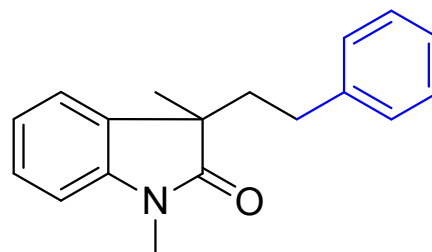

7.320  
7.301  
7.282  
7.238  
7.221  
7.204  
7.186  
7.144  
7.126  
7.107  
7.089  
7.032  
7.014  
6.877  
6.858

3.210  
2.299  
2.276  
2.264  
2.243  
2.231  
2.164  
2.138  
2.129  
2.017  
1.998

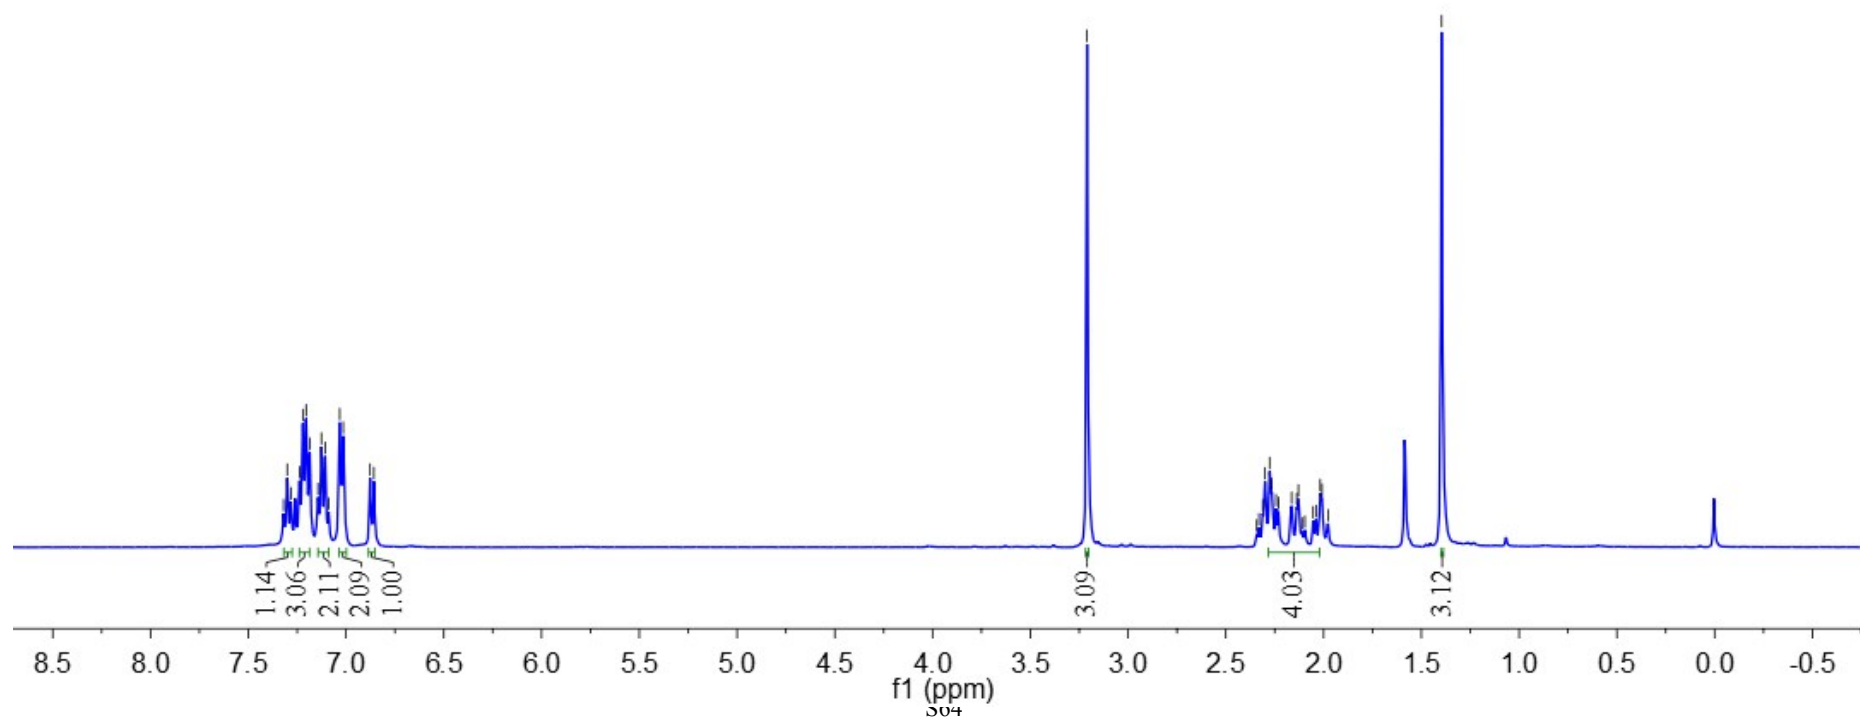

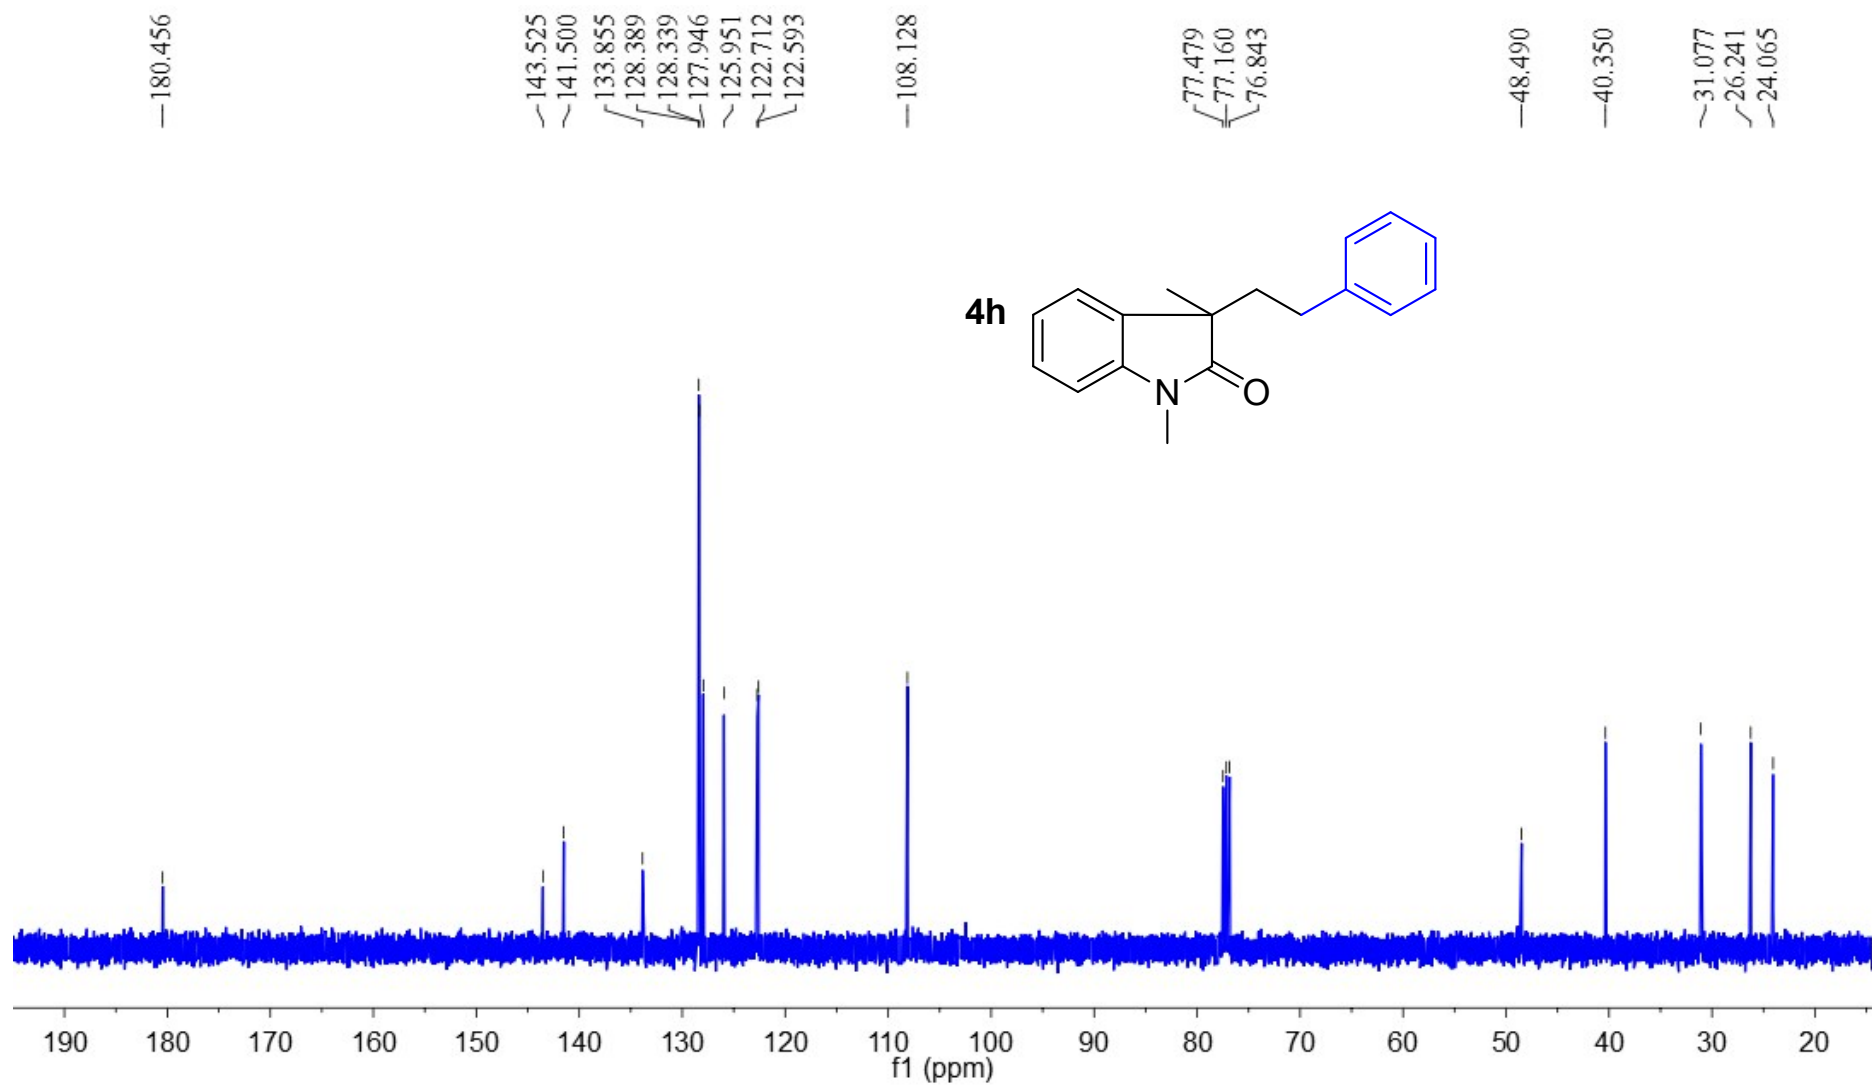

7.249  
7.231  
7.215  
7.197  
7.152  
7.134  
7.117  
7.068  
7.050  
7.031  
6.827  
6.808

3.196  
2.529  
2.515  
2.508  
2.492  
2.454  
2.438  
1.965  
1.955  
1.935  
1.782  
1.740

4i

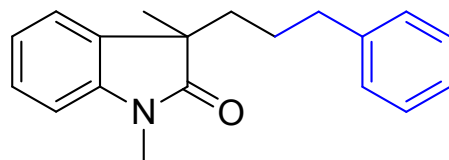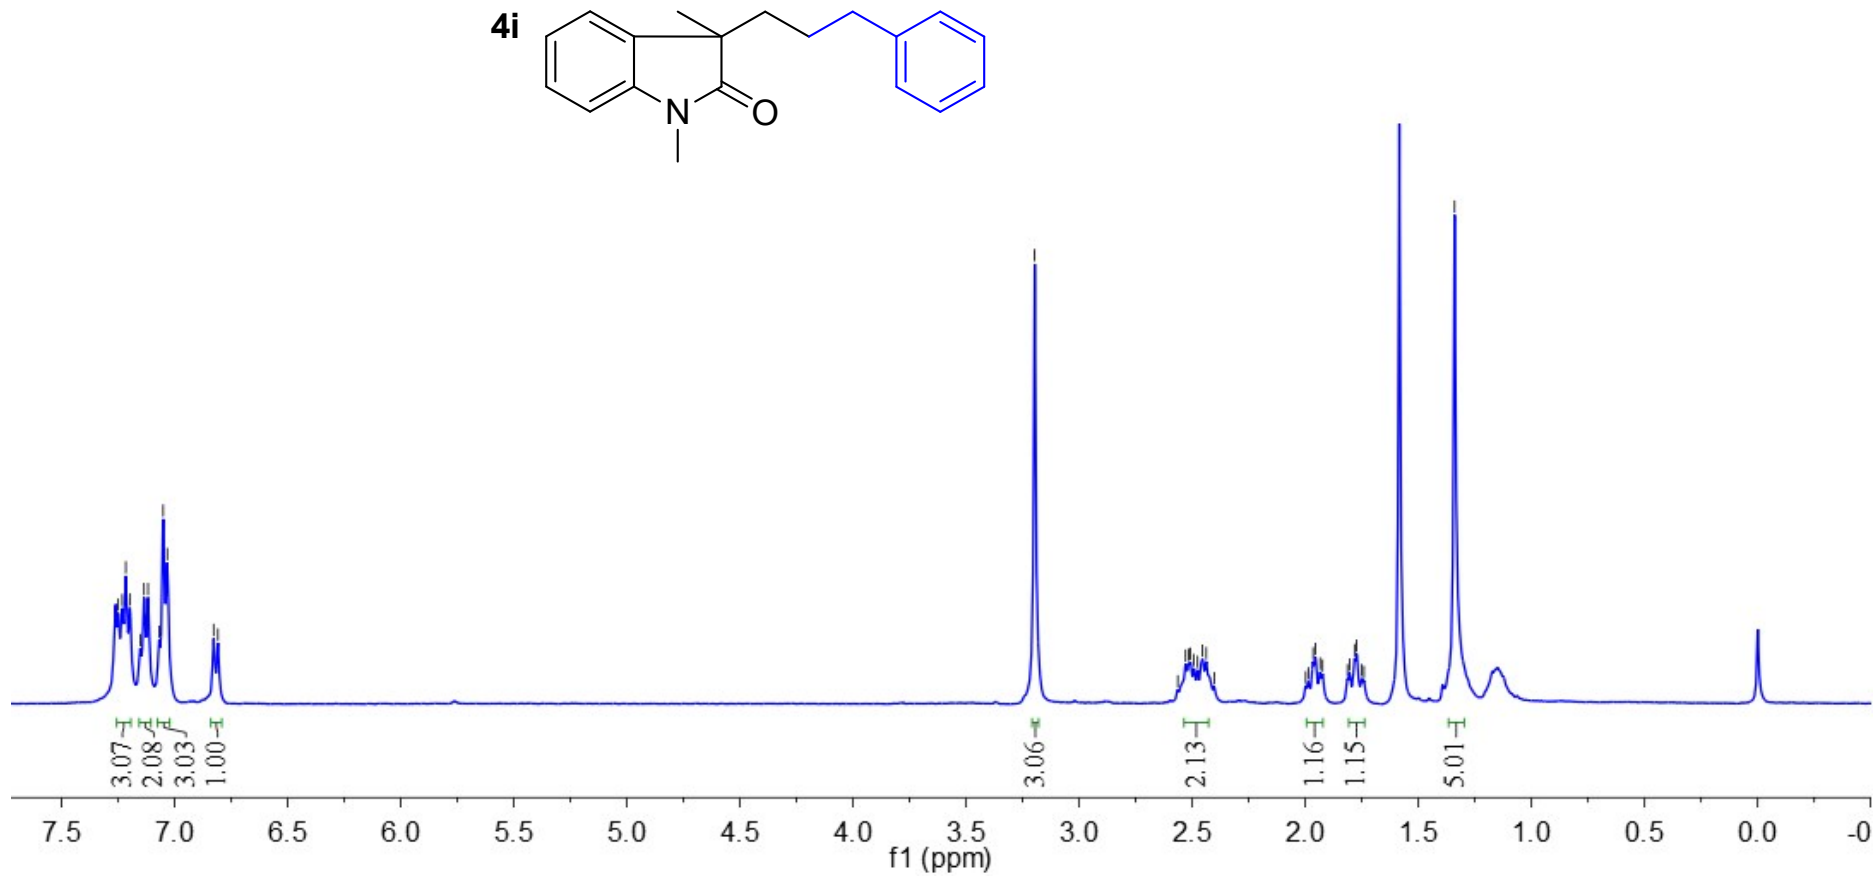

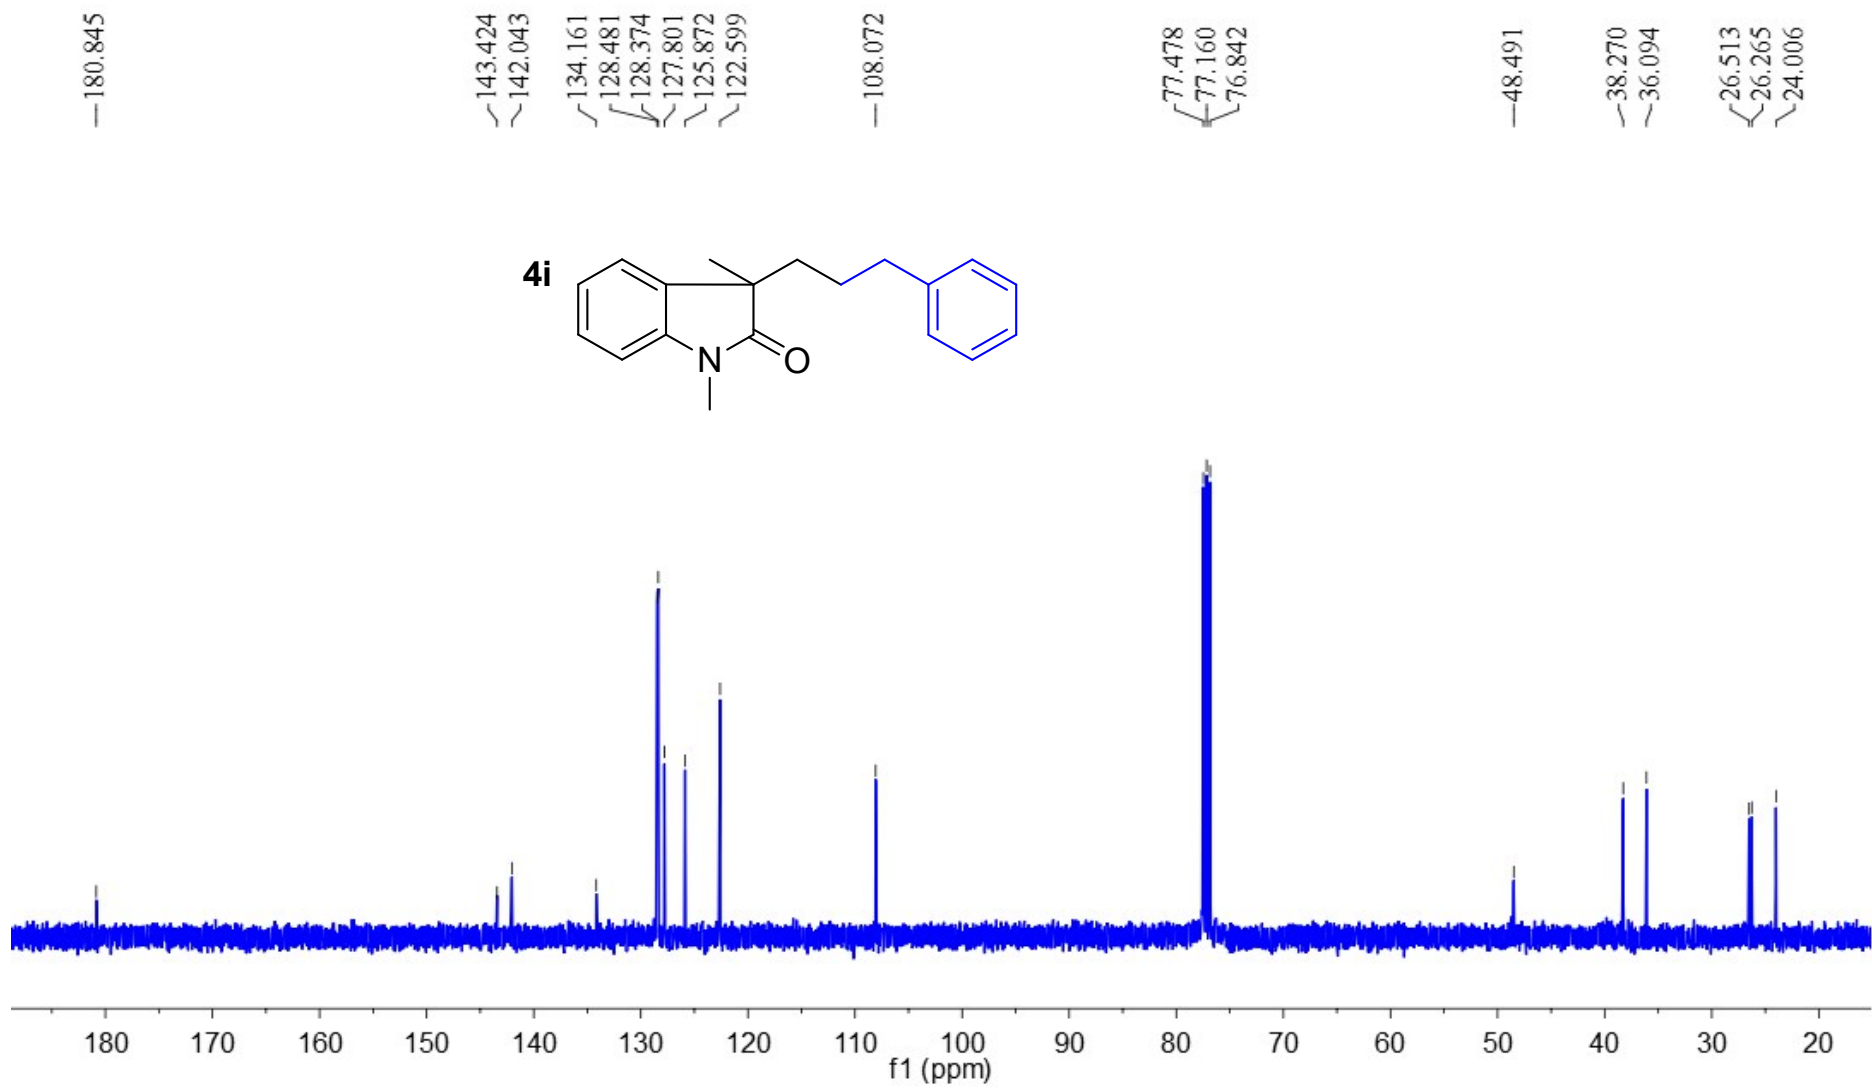

Supplement: c6gc00362a1.pdf [file c6gc00362a1.pdf]
